# Supplementary material for: Stay-at-home and face mask policies intentions inconsistent with incidence and fatality during US COVID-19 pandemic
Source: bioRxiv or medRxiv preprint supplement (doi:10.1101/2020.10.25.20219279), 2020-12-02
Supplement: Supplementary file [file media-1.pdf]

## Supplementary Online Content

Stay-at-home and face mask policies intentions inconsistent with incidence and fatality during  
US COVID-19 pandemic

Samuel Xi Wu and Xin Wu, MD, MS

|                                                                |             |
|----------------------------------------------------------------|-------------|
| eTable 1. Public reports reference other than papers and books | page 2      |
| eTable 2. Date of stay at home and mandatory face mask orders  | Page 3      |
| eTable 3. COVID-19 cases until 2020-08-23                      | pages 4-14  |
| eTable 4. COVID-19 death until 2020-08-23                      | Pages 15-25 |

## **Supplemental 1**

Supplemental eTable 1: Public reports reference other than papers and books

|                                                                                                                                                                                                                                                                                                                                                                                                                                                                                                                                                                                                                                                                                                                                                                                                                                                                                                                                                                                                                                                                                                                                                                                                                                                                                                                                                                                                                                                                                  |
|----------------------------------------------------------------------------------------------------------------------------------------------------------------------------------------------------------------------------------------------------------------------------------------------------------------------------------------------------------------------------------------------------------------------------------------------------------------------------------------------------------------------------------------------------------------------------------------------------------------------------------------------------------------------------------------------------------------------------------------------------------------------------------------------------------------------------------------------------------------------------------------------------------------------------------------------------------------------------------------------------------------------------------------------------------------------------------------------------------------------------------------------------------------------------------------------------------------------------------------------------------------------------------------------------------------------------------------------------------------------------------------------------------------------------------------------------------------------------------|
| <p><b>Case and fatality data:</b><br/>CDC1: Implementation of mitigation strategies for community COVID-19 transmission. Atlanta, GA: US. Department of Health and Human Services, CDC; 2020. <a href="https://www.cdc.gov/coronavirus/2019-ncov/community/community-mitigation.html">https://www.cdc.gov/coronavirus/2019-ncov/community/community-mitigation.html</a><br/>CDC2: <a href="https://data.cdc.gov/Case-Surveillance/United-States-COVID-19-Cases-and-Deaths-by-State-o/9mfq-cb36">https://data.cdc.gov/Case-Surveillance/United-States-COVID-19-Cases-and-Deaths-by-State-o/9mfq-cb36</a><br/>CDC3: Considerations for Wearing Masks Help Slow the Spread of COVID-19 (who should/should not wear a mask) <a href="https://www.cdc.gov/coronavirus/2019-ncov/prevent-getting-sick/cloth-face-cover-guidance.html">https://www.cdc.gov/coronavirus/2019-ncov/prevent-getting-sick/cloth-face-cover-guidance.html</a>.<br/>HealthData.gov-link: <a href="https://healthdata.gov/dataset/covid-19-state-and-county-policy-orders">https://healthdata.gov/dataset/covid-19-state-and-county-policy-orders</a><br/>Johns Hopkins Coronavirus Resource Center: <a href="https://coronavirus.jhu.edu/us-map">https://coronavirus.jhu.edu/us-map</a><br/>The Covid-19 Tracking Project: <a href="https://covidtracking.com/data#TX">https://covidtracking.com/data#TX</a><br/>Our World in Data: <a href="https://ourworldindata.org/">https://ourworldindata.org/</a></p> |
| <p><b>Hospital and health professional data:</b><br/>AHA (hospital data) : <a href="https://www.aha.org/statistics/fast-facts-us-hospitals">https://www.aha.org/statistics/fast-facts-us-hospitals</a><br/>Nurse workforce in the US: <a href="https://www.nursingworld.org/practice-policy/workforce/">https://www.nursingworld.org/practice-policy/workforce/</a><br/>Respiratory Therapists: <a href="https://www.bls.gov/ooh/healthcare/respiratory-therapists.htm">https://www.bls.gov/ooh/healthcare/respiratory-therapists.htm</a><br/>AAMC physician data: <a href="https://www.aamc.org/data-reports/workforce/interactive-data/active-physicians-us-doctor-medicine-us-md-degree-specialty-2015">https://www.aamc.org/data-reports/workforce/interactive-data/active-physicians-us-doctor-medicine-us-md-degree-specialty-2015</a></p>                                                                                                                                                                                                                                                                                                                                                                                                                                                                                                                                                                                                                                 |
| <p><b>Stay at home and face masking order:</b><br/>USA Today: Coronavirus reopening. Map of COVID-19 case trends, reopening status and mobility, 20200829: <a href="https://www.usatoday.com/storytelling/coronavirus-reopening-america-map/">https://www.usatoday.com/storytelling/coronavirus-reopening-america-map/</a><br/>See Which States and Cities Have Told Residents to Stay at Home - The New York Times: <a href="https://www.nytimes.com/interactive/2020/us/coronavirus-stay-at-home-order.html">https://www.nytimes.com/interactive/2020/us/coronavirus-stay-at-home-order.html</a><br/>Face mask: <a href="https://www.littler.com/publication-press/publication/facing-your-face-mask-duties-list-statewide-orders">https://www.littler.com/publication-press/publication/facing-your-face-mask-duties-list-statewide-orders</a><br/>Face mask: <a href="https://www.aarp.org/health/healthy-living/info-2020/states-mask-mandates-coronavirus.html">https://www.aarp.org/health/healthy-living/info-2020/states-mask-mandates-coronavirus.html</a><br/>Face masks: <a href="https://masks4all.co/what-states-require-masks/">https://masks4all.co/what-states-require-masks/</a></p>                                                                                                                                                                                                                                                                           |
| <p><b>Population density</b> based on data from the 2013 estimate of population by the United States Census Bureau: <a href="https://simple.wikipedia.org/wiki/List_of_U.S._states_by_population_density">https://simple.wikipedia.org/wiki/List_of_U.S._states_by_population_density</a></p>                                                                                                                                                                                                                                                                                                                                                                                                                                                                                                                                                                                                                                                                                                                                                                                                                                                                                                                                                                                                                                                                                                                                                                                    |
| <p><b>Texas reopening:</b> Gov. Greg Abbott loosens coronavirus restrictions for restaurants and other businesses in most regions of Texas: <a href="https://www.texastribune.org/2020/09/17/greg-abbott-texas-coronavirus/">https://www.texastribune.org/2020/09/17/greg-abbott-texas-coronavirus/</a></p>                                                                                                                                                                                                                                                                                                                                                                                                                                                                                                                                                                                                                                                                                                                                                                                                                                                                                                                                                                                                                                                                                                                                                                      |
| <p>Three Metrics To Gauge Our Progress, Coronavirus (COVID-19) Updates. Texas Medical Center (TMC). <a href="https://www.tmc.edu/coronavirus-updates/three-metrics-to-gauge-our-progress-2/">https://www.tmc.edu/coronavirus-updates/three-metrics-to-gauge-our-progress-2/</a></p>                                                                                                                                                                                                                                                                                                                                                                                                                                                                                                                                                                                                                                                                                                                                                                                                                                                                                                                                                                                                                                                                                                                                                                                              |

**eTable 2. Data of date of stay at home and mandatory face mask orders**

| States                          | population<br>in 2019 | population<br>density<br>2013<br>(/mile2) | current date | date of mask<br>order | stay at<br>home  | stay at<br>home | COVID-19 antigen<br>testing number<br>until 8/23/2020 | Date of the first<br>peak of the new<br>daily positive (7<br>day average) | date of most<br>recent peak of<br>the new daily<br>positive (7 day<br>average) |
|---------------------------------|-----------------------|-------------------------------------------|--------------|-----------------------|------------------|-----------------|-------------------------------------------------------|---------------------------------------------------------------------------|--------------------------------------------------------------------------------|
|                                 |                       |                                           |              |                       | starting<br>date | ending date     |                                                       |                                                                           |                                                                                |
| .Alabama                        | 4,903,185             | 95.40                                     | 8/23/2020    | 7/15/2020             | 4/4/2020         | 4/30/2020       | 916,703                                               | 7/24/2020                                                                 | 7/24/2020                                                                      |
| .Alaska                         | 731,545               | 1.30                                      | 8/23/2020    |                       | 3/11/2020        | 4/21/2020       | 327,440                                               | 8/1/2020                                                                  | 8/1/2020                                                                       |
| .Arizona                        | 7,278,717             | 58.30                                     | 8/23/2020    |                       | 3/30/2020        | 5/15/2020       | 1,149,287                                             | 6/1/2020                                                                  | 6/1/2020                                                                       |
| .Arkansas                       | 3,017,804             | 57.00                                     | 8/23/2020    | 7/20/2020             |                  |                 | 670,826                                               | 7/24/2020                                                                 | 7/24/2020                                                                      |
| .California                     | 39,512,223            | 246.10                                    | 8/23/2020    | 6/18/2020             | 3/19/2020        | 5/4/2020        | 10,541,031                                            | 7/29/2020                                                                 | 7/29/2020                                                                      |
| .Colorado (2 peaks)             | 5,758,736             | 50.80                                     | 8/23/2020    | 7/17/2020             | 3/26/2020        | 5/8/2020        | 930,152                                               | 4/25/2020                                                                 | 7/26/2020                                                                      |
| .Connecticut                    | 3,565,287             | 742.60                                    | 8/23/2020    | 4/20/2020             | 3/23/2020        | 5/20/2020       | 1,020,328                                             | 4/21/2020                                                                 | 4/21/2020                                                                      |
| .Delaware (2 peaks)             | 973,764               | 475.10                                    | 8/23/2020    | 4/28/2020             | 3/24/2020        | 5/15/2020       | 221,845                                               | 4/27/2020                                                                 | 8/14/2020                                                                      |
| .District of Columbia (2 peaks) | 705,749               | 10588.00                                  | 8/23/2020    | 5/16/2020             | 4/1/2020         | 5/29/2020       | 266,046                                               | 5/2/2020                                                                  | 7/22/2020                                                                      |
| .Florida                        | 21,477,737            | 364.60                                    | 8/23/2020    |                       | 3/20/2020        | 4/30/2020       | 6,016,043                                             | 7/12/2020                                                                 | 7/12/2020                                                                      |
| .Georgia                        | 10,617,423            | 173.70                                    | 8/23/2020    |                       | 4/3/2020         | 4/30/2020       | 2,171,884                                             | 7/24/2020                                                                 | 7/24/2020                                                                      |
| .Hawaii                         | 1,415,872             | 218.60                                    | 8/23/2020    | 4/20/2020             | 3/25/2020        | 5/31/2020       | 228,381                                               | 8/14/2020                                                                 | 8/14/2020                                                                      |
| .Idaho                          | 1,787,065             | 19.50                                     | 8/23/2020    |                       | 3/25/2020        | 4/30/2020       | 235,255                                               | 7/16/2020                                                                 | 7/16/2020                                                                      |
| .Illinois (2 peaks)             | 12,671,821            | 232.00                                    | 8/23/2020    | 5/1/2020              | 3/21/2020        | 5/30/2020       | 3,704,036                                             | 5/13/2020                                                                 | 8/21/2020                                                                      |
| .Indiana (2 peaks)              | 6,732,219             | 183.40                                    | 8/23/2020    | 7/27/2020             | 3/25/2020        | 5/1/2020        | 1,273,212                                             | 4/26/2020                                                                 | 8/23/2020                                                                      |
| .Iowa                           | 3,155,070             | 55.30                                     | 8/23/2020    |                       |                  |                 | 595,765                                               | 8/23/2020                                                                 | 8/23/2020                                                                      |
| .Kansas                         | 2,913,314             | 35.40                                     | 8/23/2020    | 7/3/2020              | 3/30/2020        | 5/3/2020        | 366,315                                               | 8/23/2020                                                                 | 8/23/2020                                                                      |
| .Kentucky                       | 4,467,673             | 111.30                                    | 8/23/2020    | 5/11/2020             | 3/26/2020        | 5/11/2020       | 1,763,838                                             | 8/13/2020                                                                 | 8/13/2020                                                                      |
| .Louisiana (2 peaks)            | 4,648,794             | 107.10                                    | 8/23/2020    | 7/13/2020             | 3/23/2020        | 5/14/2020       | 1,763,838                                             | 4/3/2020                                                                  | 8/3/2020                                                                       |
| .Maine                          | 1,344,212             | 43.10                                     | 8/23/2020    | 5/1/2020              | 4/2/2020         | 5/31/2020       | 231,256                                               | 5/21/2020                                                                 | 5/21/2020                                                                      |
| .Maryland (2 peaks)             | 6,045,680             | 610.80                                    | 8/23/2020    | 4/18/2020             | 3/30/2020        | 5/15/2020       | 1,772,656                                             | 5/20/2020                                                                 | 8/1/2020                                                                       |
| .Massachusetts                  | 6,892,503             | 858.00                                    | 8/23/2020    | 5/6/2020              | 4/24/2020        | 5/18/2020       | 2,064,529                                             | 4/24/2020                                                                 | 4/24/2020                                                                      |
| .Michigan (2 peaks)             | 9,986,857             | 175.00                                    | 8/23/2020    | 7/10/2020             | 3/24/2020        | 6/5/2020        | 2,564,334                                             | 4/2/2020                                                                  | 8/1/2020                                                                       |
| .Minnesota (2 peaks)            | 5,639,632             | 68.10                                     | 8/23/2020    | 7/25/2020             | 3/27/2020        | 5/4/2020        | 1,374,536                                             | 5/23/2020                                                                 | 7/26/2020                                                                      |
| .Mississippi                    | 2,976,149             | 63.70                                     | 8/23/2020    | 8/4/2020              | 4/3/2020         | 5/11/2020       | 530,974                                               | 7/29/2020                                                                 | 7/29/2020                                                                      |
| .Missouri                       | 6,137,428             | 87.90                                     | 8/23/2020    |                       | 4/6/2020         | 5/3/2020        | 1,218,097                                             | 7/29/2020                                                                 | 7/29/2020                                                                      |
| .Montana                        | 1,068,778             | 7.00                                      | 8/23/2020    | 7/16/2020             | 3/26/2020        | 4/24/2020       | 210,749                                               | 7/30/2020                                                                 | 7/30/2020                                                                      |
| .Nebraska (2 peaks)             | 1,934,408             | 24.30                                     | 8/23/2020    |                       |                  |                 | 338,836                                               | 4/30/2020                                                                 | 7/31/2020                                                                      |
| .Nevada                         | 3,080,156             | 25.40                                     | 8/23/2020    | 6/24/2020             | 3/31/2020        | 5/15/2020       | 809,683                                               | 7/17/2020                                                                 | 7/17/2020                                                                      |
| .New Hampshire                  | 1,359,711             | 147.80                                    | 8/23/2020    |                       | 3/27/2020        | 6/15/2020       | 301,316                                               | 5/2/2020                                                                  | 5/2/2020                                                                       |
| .New Jersey                     | 8,882,190             | 1210.10                                   | 8/23/2020    | 4/8/2020              | 3/21/2020        | 6/15/2020       | 2,648,740                                             | 4/4/2020                                                                  | 4/4/2020                                                                       |
| .New Mexico                     | 2,096,829             | 17.20                                     | 8/23/2020    | 5/16/2020             | 3/24/2020        | 5/15/2020       | 704,955                                               | 7/28/2020                                                                 | 7/28/2020                                                                      |
| .New York                       | 19,453,561            | 417.00                                    | 8/23/2020    | 4/17/2020             | 3/22/2020        | 5/15/2020       | 7,621,159                                             | 4/9/2020                                                                  | 4/9/2020                                                                       |
| .North Carolina (2 peaks)       | 10,488,084            | 202.60                                    | 8/23/2020    | 6/26/2020             | 3/30/2020        | 5/8/2020        | 2,078,472                                             | 7/23/2020                                                                 | 8/21/2020                                                                      |
| .North Dakota                   | 762,062               | 10.50                                     | 8/23/2020    |                       |                  |                 | 432,725                                               | 8/23/2020                                                                 | 8/23/2020                                                                      |
| .Ohio                           | 11,689,100            | 283.20                                    | 8/23/2020    | 7/23/2020             | 3/23/2020        | 5/30/2020       | 1,977,822                                             | 7/30/2020                                                                 | 7/30/2020                                                                      |
| .Oklahoma                       | 3,956,971             | 56.10                                     | 8/23/2020    |                       |                  |                 | 821,289                                               | 7/27/2020                                                                 | 7/27/2020                                                                      |
| .Oregon                         | 4,217,737             | 40.90                                     | 8/23/2020    | 7/1/2020              | 3/23/2020        | 5/15/2020       | 510,056                                               | 7/24/2020                                                                 | 7/24/2020                                                                      |
| .Pennsylvania (2 peaks)         | 12,801,989            | 285.50                                    | 8/23/2020    | 4/19/2020             | 3/30/2020        | 5/15/2020       | 1,549,379                                             | 4/9/2020                                                                  | 7/28/2020                                                                      |
| .Rhode Island (2 peaks)         | 1,059,361             | 1017.10                                   | 8/23/2020    | 5/8/2020              | 3/28/2020        | 5/8/2020        | 470,162                                               | 4/24/2020                                                                 | 8/6/2020                                                                       |
| .South Carolina                 | 5,148,714             | 158.80                                    | 8/23/2020    |                       | 4/7/2020         | 5/12/2020       | 891,006                                               | 7/11/2020                                                                 | 7/11/2020                                                                      |
| .South Dakota (2 peaks)         | 884,659               | 11.50                                     | 8/23/2020    |                       |                  |                 | 176,843                                               | 5/9/2020                                                                  | 8/23/2020                                                                      |
| .Tennessee                      | 6,829,174             | 157.50                                    | 8/23/2020    |                       | 4/2/2020         | 4/30/2020       | 2,042,256                                             | 7/27/2020                                                                 | 7/27/2020                                                                      |
| .Texas                          | 28,995,881            | 101.20                                    | 8/23/2020    | 7/3/2020              | 4/2/2020         | 4/30/2020       | 4,668,028                                             | 7/16/2020                                                                 | 7/16/2020                                                                      |
| .Utah                           | 3,205,958             | 35.30                                     | 8/23/2020    |                       |                  |                 | 766,985                                               | 7/17/2020                                                                 | 7/17/2020                                                                      |
| .Vermont                        | 623,989               | 68.00                                     | 8/23/2020    | 8/1/2020              | 3/24/2020        | 5/15/2020       | 120,043                                               | 4/4/2020                                                                  | 4/4/2020                                                                       |
| .Virginia (2 peaks)             | 8,535,519             | 209.20                                    | 8/23/2020    | 5/29/2020             | 3/30/2020        | 6/10/2020       | 1,466,033                                             | 5/26/2020                                                                 | 8/8/2020                                                                       |
| .Washington                     | 7,614,893             | 104.90                                    | 8/23/2020    | 6/26/2020             | 3/23/2020        | 5/4/2020        | 1,379,036                                             | 7/13/2020                                                                 | 7/13/2020                                                                      |
| .West Virginia                  | 1,792,147             | 77.10                                     | 8/23/2020    | 6/6/2020              | 3/24/2020        | 5/4/2020        | 396,018                                               | 7/24/2020                                                                 | 7/24/2020                                                                      |
| .Wisconsin                      | 5,822,434             | 106.00                                    | 8/23/2020    | 8/1/2020              | 3/25/2020        | 5/26/2020       | 1,185,611                                             | 7/24/2020                                                                 | 7/24/2020                                                                      |
| .Wyoming                        | 578,759               | 6.00                                      | 8/23/2020    |                       |                  |                 | 93,231                                                | 7/23/2020                                                                 | 7/23/2020                                                                      |





| 2/28/2020 | 2/29/2020 | 3/1/2020 | 3/2/2020 | 3/3/2020 | 3/4/2020 | 3/5/2020 | 3/6/2020 | 3/7/2020 | 3/8/2020 | 3/9/2020 | 3/10/2020 | 3/11/2020 | 3/12/2020 | 3/13/2020 | 3/14/2020 | 3/15/2020 | 3/16/2020 | 3/17/2020 | 3/18/2020 | 3/19/2020 |
|-----------|-----------|----------|----------|----------|----------|----------|----------|----------|----------|----------|-----------|-----------|-----------|-----------|-----------|-----------|-----------|-----------|-----------|-----------|
| 0         | 0         | 0        | 0        | 0        | 0        | 0        | 0        | 0        | 0        | 0        | 0         | 0         | 0         | 1         | 1         | 1         | 1         | 3         | 6         | 9         |
| 0         | 0         | 0        | 0        | 0        | 0        | 0        | 0        | 0        | 0        | 0        | 0         | 0         | 0         | 1         | 1         | 22        | 29        | 39        | 51        | 78        |
| 0         | 0         | 0        | 0        | 0        | 0        | 0        | 0        | 0        | 0        | 0        | 0         | 1         | 6         | 9         | 12        | 16        | 17        | 24        | 37        | 64        |
| 1         | 1         | 1        | 1        | 2        | 2        | 3        | 3        | 5        | 5        | 6        | 8         | 9         | 9         | 10        | 12        | 13        | 18        | 18        | 27        | 44        |
| 11        | 12        | 12       | 21       | 29       | 36       | 45       | 56       | 56       | 110      | 135      | 152       | 175       | 224       | 264       | 311       | 369       | 447       | 596       | 652       | 982       |
| 0         | 0         | 0        | 0        | 0        | 0        | 1        | 2        | 8        | 8        | 12       | 17        | 34        | 49        | 49        | 49        | 144       | 160       | 183       | 216       | 277       |
| 0         | 0         | 0        | 0        | 0        | 0        | 0        | 0        | 0        | 1        | 1        | 2         | 3         | 7         | 7         | 7         | 26        | 41        | 68        | 96        | 159       |
| 0         | 0         | 0        | 0        | 0        | 0        | 0        | 0        | 1        | 1        | 2        | 2         | 2         | 2         | 3         | 3         | 17        | 22        | 31        | 39        | 71        |
| 0         | 0         | 0        | 0        | 0        | 0        | 0        | 0        | 0        | 0        | 0        | 0         | 1         | 4         | 5         | 8         | 8         | 8         | 16        | 26        | 30        |
| 0         | 0         | 0        | 1        | 2        | 2        | 3        | 3        | 6        | 6        | 19       | 19        | 26        | 31        | 31        | 55        | 136       | 142       | 195       | 299       | 393       |
| 0         | 0         | 0        | 0        | 2        | 2        | 2        | 3        | 6        | 7        | 18       | 23        | 31        | 45        | 45        | 45        | 119       | 143       | 178       | 262       | 397       |
| 0         | 0         | 0        | 0        | 0        | 0        | 0        | 0        | 1        | 1        | 1        | 1         | 1         | 1         | 2         | 2         | 7         | 10        | 10        | 10        | 20        |
| 0         | 0         | 0        | 0        | 0        | 0        | 0        | 0        | 0        | 3        | 8        | 13        | 14        | 16        | 16        | 16        | 22        | 23        | 29        | 38        | 44        |
| 0         | 0         | 0        | 0        | 0        | 0        | 0        | 0        | 0        | 0        | 0        | 0         | 0         | 0         | 0         | 1         | 5         | 5         | 5         | 10        | 23        |
| 2         | 2         | 3        | 4        | 4        | 4        | 5        | 6        | 6        | 7        | 11       | 19        | 27        | 32        | 32        | 32        | 93        | 105       | 160       | 288       | 422       |
| 0         | 0         | 0        | 0        | 0        | 0        | 0        | 1        | 1        | 2        | 3        | 5         | 9         | 12        | 12        | 12        | 19        | 24        | 30        | 39        | 56        |
| 0         | 0         | 0        | 0        | 0        | 0        | 0        | 0        | 0        | 1        | 1        | 1         | 1         | 4         | 6         | 7         | 8         | 11        | 16        | 21        | 35        |
| 0         | 0         | 0        | 0        | 0        | 0        | 0        | 0        | 1        | 1        | 1        | 4         | 4         | 11        | 11        | 15        | 20        | 22        | 26        | 35        | 43        |
| 0         | 0         | 0        | 0        | 0        | 0        | 0        | 0        | 0        | 0        | 1        | 1         | 8         | 14        | 33        | 33        | 101       | 137       | 190       | 261       | 392       |
| 1         | 1         | 1        | 1        | 2        | 2        | 2        | 7        | 9        | 28       | 28       | 91        | 95        | 108       | 109       | 109       | 164       | 197       | 218       | 256       | 328       |
| 0         | 0         | 0        | 0        | 0        | 0        | 3        | 3        | 3        | 3        | 9        | 9         | 12        | 12        | 12        | 12        | 37        | 57        | 85        | 107       | 149       |
| 0         | 0         | 0        | 0        | 0        | 0        | 0        | 0        | 0        | 0        | 0        | 0         | 0         | 1         | 1         | 5         | 14        | 19        | 32        | 44        | 52        |
| 0         | 0         | 0        | 0        | 0        | 0        | 0        | 0        | 0        | 0        | 0        | 2         | 2         | 3         | 13        | 25        | 53        | 54        | 65        | 80        | 334       |
| 0         | 0         | 0        | 0        | 0        | 0        | 0        | 1        | 1        | 2        | 2        | 4         | 5         | 10        | 14        | 14        | 54        | 60        | 77        | 89        | 115       |
| 0         | 0         | 0        | 0        | 0        | 0        | 0        | 0        | 1        | 1        | 1        | 1         | 1         | 1         | 2         | 2         | 5         | 8         | 13        | 24        | 28        |
| 0         | 0         | 0        | 0        | 0        | 0        | 0        | 0        | 0        | 0        | 0        | 0         | 0         | 1         | 1         | 6         | 10        | 12        | 34        | 50        | 80        |
| 0         | 0         | 0        | 0        | 0        | 0        | 0        | 0        | 0        | 0        | 0        | 0         | 1         | 1         | 1         | 1         | 7         | 7         | 11        | 12        | 15        |
| 0         | 0         | 0        | 0        | 1        | 1        | 1        | 2        | 2        | 2        | 7        | 7         | 8         | 15        | 15        | 17        | 33        | 40        | 62        | 97        | 137       |
| 0         | 0         | 0        | 0        | 0        | 0        | 0        | 0        | 0        | 0        | 0        | 0         | 0         | 1         | 1         | 1         | 1         | 1         | 5         | 7         | 19        |
| 0         | 0         | 0        | 0        | 0        | 0        | 0        | 1        | 2        | 2        | 4        | 4         | 5         | 10        | 10        | 10        | 18        | 18        | 21        | 27        | 27        |
| 0         | 0         | 0        | 1        | 2        | 2        | 2        | 4        | 6        | 4        | 4        | 5         | 5         | 6         | 6         | 6         | 13        | 17        | 26        | 39        | 44        |
| 0         | 0         | 0        | 0        | 0        | 0        | 2        | 4        | 6        | 6        | 8        | 15        | 23        | 29        | 30        | 44        | 98        | 178       | 267       | 427       | 742       |
| 0         | 0         | 0        | 0        | 0        | 0        | 0        | 0        | 0        | 0        | 0        | 0         | 3         | 5         | 5         | 7         | 17        | 21        | 23        | 28        | 35        |
| 0         | 0         | 0        | 0        | 0        | 0        | 1        | 1        | 2        | 3        | 4        | 5         | 7         | 11        | 11        | 11        | 16        | 45        | 55        | 63        | 95        |
| 0         | 0         | 0        | 1        | 1        | 2        | 14       | 23       | 30       | 40       | 142      | 173       | 217       | 325       | 362       | 461       | 669       | 831       | 2601      | 4597      | 6834      |
| 0         | 0         | 0        | 0        | 0        | 0        | 0        | 0        | 0        | 0        | 0        | 3         | 3         | 5         | 5         | 5         | 37        | 50        | 67        | 88        | 119       |
| 0         | 0         | 0        | 0        | 0        | 0        | 0        | 0        | 1        | 1        | 1        | 2         | 2         | 3         | 5         | 5         | 9         | 10        | 19        | 31        | 49        |
| 0         | 1         | 1        | 3        | 3        | 3        | 3        | 3        | 7        | 14       | 14       | 15        | 19        | 24        | 24        | 24        | 39        | 47        | 65        | 75        | 88        |
| 0         | 0         | 0        | 0        | 0        | 0        | 0        | 2        | 4        | 6        | 10       | 12        | 16        | 23        | 29        | 47        | 63        | 76        | 96        | 133       | 185       |
| 0         | 0         | 1        | 2        | 2        | 2        | 2        | 3        | 3        | 3        | 3        | 5         | 5         | 5         | 5         | 9         | 21        | 23        | 23        | 33        | 44        |
| 0         | 0         | 0        | 0        | 0        | 0        | 0        | 0        | 2        | 6        | 7        | 9         | 10        | 12        | 12        | 12        | 28        | 33        | 47        | 60        | 81        |
| 0         | 0         | 0        | 0        | 0        | 0        | 0        | 0        | 0        | 0        | 0        | 5         | 8         | 8         | 9         | 9         | 9         | 10        | 11        | 11        | 14        |
| 0         | 0         | 0        | 0        | 0        | 0        | 1        | 1        | 1        | 1        | 1        | 7         | 9         | 18        | 26        | 26        | 39        | 52        | 73        | 98        | 154       |
| 0         | 0         | 0        | 0        | 0        | 0        | 3        | 5        | 5        | 6        | 13       | 15        | 23        | 24        | 36        | 43        | 51        | 57        | 64        | 83        | 143       |
| 0         | 0         | 0        | 0        | 0        | 0        | 0        | 0        | 0        | 1        | 1        | 2         | 3         | 4         | 6         | 6         | 21        | 29        | 29        | 40        | 68        |
| 0         | 0         | 0        | 0        | 0        | 0        | 0        | 0        | 0        | 2        | 5        | 8         | 15        | 29        | 29        | 29        | 51        | 67        | 68        | 94        | 114       |
| 0         | 0         | 0        | 0        | 0        | 0        | 0        | 0        | 0        | 1        | 1        | 1         | 1         | 2         | 2         | 3         | 4         | 8         | 10        | 12        | 16        |
| 1         | 7         | 11       | 18       | 27       | 39       | 70       | 79       | 102      | 136      | 162      | 267       | 366       | 457       | 568       | 642       | 708       | 769       | 930       | 1,187     | 1,376     |
| 0         | 0         | 0        | 0        | 1        | 1        | 1        | 1        | 1        | 1        | 1        | 3         | 5         | 8         | 9         | 19        | 27        | 53        | 88        | 106       | 155       |
| 0         | 0         | 0        | 0        | 0        | 0        | 0        | 0        | 0        | 0        | 0        | 0         | 0         | 0         | 0         | 0         | 0         | 0         | 1         | 2         | 5         |
| 0         | 0         | 0        | 0        | 0        | 0        | 0        | 0        | 0        | 0        | 0        | 0         | 0         | 1         | 1         | 2         | 3         | 3         | 11        | 16        | 18        |

| 3/20/2020 | 3/21/2020 | 3/22/2020 | 3/23/2020 | 3/24/2020 | 3/25/2020 | 3/26/2020 | 3/27/2020 | 3/28/2020 | 3/29/2020 | 3/30/2020 | 3/31/2020 | 4/1/2020 | 4/2/2020 | 4/3/2020 | 4/4/2020 | 4/5/2020 | 4/6/2020 | 4/7/2020 | 4/8/2020 | 4/9/2020 |
|-----------|-----------|-----------|-----------|-----------|-----------|-----------|-----------|-----------|-----------|-----------|-----------|----------|----------|----------|----------|----------|----------|----------|----------|----------|
| 12        | 14        | 22        | 36        | 42        | 59        | 69        | 85        | 102       | 114       | 119       | 133       | 143      | 147      | 157      | 171      | 185      | 191      | 213      | 226      | 235      |
| 106       | 131       | 157       | 196       | 242       | 386       | 531       | 639       | 720       | 830       | 947       | 999       | 1,106    | 1,270    | 1,535    | 1,633    | 1,841    | 2,006    | 2,197    | 2,499    | 2,838    |
| 100       | 118       | 164       | 197       | 230       | 306       | 349       | 386       | 409       | 443       | 504       | 560       | 614      | 679      | 738      | 743      | 853      | 915      | 993      | 1,071    | 1,127    |
| 63        | 104       | 152       | 253       | 326       | 401       | 508       | 665       | 773       | 919       | 1,157     | 1,289     | 1,413    | 1,598    | 1,769    | 2,019    | 2,269    | 2,456    | 2,575    | 2,726    | 3,018    |
| 1,304     | 1,534     | 1,709     | 1,931     | 2,511     | 2,982     | 3,777     | 4,730     | 5,259     | 5,739     | 6,909     | 8,131     | 8,155    | 9,191    | 12,024   | 12,026   | 13,438   | 14,336   | 15,865   | 16,957   | 18,309   |
| 363       | 475       | 591       | 720       | 921       | 1,086     | 1,430     | 1,734     | 2,061     | 2,307     | 2,627     | 2,966     | 3,342    | 3,728    | 4,173    | 4,565    | 4,950    | 5,172    | 5,429    | 5,655    | 6,202    |
| 194       | 223       | 327       | 415       | 618       | 875       | 1,012     | 1,291     | 1,524     | 1,993     | 2,571     | 3,128     | 3,557    | 3,824    | 4,915    | 5,276    | 5,675    | 6,906    | 7,781    | 8,781    | 9,784    |
| 77        | 98        | 116       | 137       | 183       | 231       | 267       | 304       | 342       | 401       | 495       | 495       | 586      | 653      | 757      | 902      | 998      | 1,097    | 1,211    | 1,440    | 1,523    |
| 39        | 45        | 56        | 87        | 104       | 119       | 143       | 165       | 214       | 232       | 264       | 319       | 368      | 393      | 450      | 593      | 673      | 783      | 928      | 1,116    | 1,209    |
| 510       | 706       | 937       | 1,141     | 1,373     | 1,861     | 2,352     | 3,054     | 3,877     | 4,768     | 5,489     | 6,490     | 7,495    | 8,694    | 9,925    | 11,173   | 11,961   | 13,214   | 14,302   | 15,234   | 16,323   |
| 485       | 555       | 757       | 1,015     | 1,119     | 1,441     | 1,714     | 2,198     | 2,446     | 2,703     | 3,612     | 4,585     | 4,748    | 5,486    | 5,967    | 6,383    | 6,752    | 8,634    | 9,713    | 10,446   | 11,318   |
| 37        | 48        | 48        | 66        | 70        | 76        | 86        | 98        | 126       | 141       | 163       | 185       | 205      | 225      | 270      | 310      | 324      | 332      | 362      | 377      | 386      |
| 45        | 68        | 90        | 105       | 124       | 145       | 179       | 235       | 298       | 336       | 424       | 497       | 549      | 614      | 699      | 786      | 868      | 946      | 1,048    | 1,145    | 1,270    |
| 31        | 42        | 47        | 51        | 71        | 123       | 189       | 230       | 261       | 310       | 415       | 525       | 669      | 891      | 1,013    | 1,077    | 1,101    | 1,170    | 1,210    | 1,232    | 1,353    |
| 585       | 753       | 1,049     | 1,285     | 1,535     | 1,865     | 2,538     | 3,026     | 3,491     | 4,596     | 5,057     | 5,994     | 6,980    | 7,695    | 8,904    | 10,357   | 11,256   | 12,262   | 13,549   | 15,078   | 16,422   |
| 79        | 126       | 201       | 259       | 365       | 477       | 645       | 981       | 1,232     | 1,514     | 1,786     | 2,159     | 2,565    | 3,039    | 3,457    | 3,953    | 4,411    | 4,944    | 5,507    | 5,943    | 6,351    |
| 44        | 55        | 64        | 82        | 98        | 98        | 168       | 202       | 261       | 319       | 368       | 428       | 482      | 552      | 620      | 698      | 813      | 845      | 900      | 1,076    | 1,106    |
| 48        | 87        | 103       | 124       | 163       | 198       | 248       | 302       | 394       | 439       | 480       | 591       | 680      | 770      | 831      | 917      | 955      | 1,008    | 1,149    | 1,346    | 1,452    |
| 537       | 763       | 1,035     | 1,172     | 1,388     | 1,946     | 2,305     | 2,746     | 3,315     | 3,540     | 4,025     | 5,237     | 6,424    | 9,150    | 10,297   | 12,496   | 13,010   | 14,867   | 16,284   | 17,030   | 18,283   |
| 413       | 525       | 646       | 777       | 1,159     | 1,838     | 2,417     | 3,240     | 4,257     | 4,955     | 5,752     | 6,620     | 7,738    | 8,966    | 10,402   | 11,736   | 12,500   | 13,837   | 15,202   | 16,567   | 18,941   |
| 149       | 190       | 288       | 288       | 349       | 580       | 774       | 774       | 992       | 1,239     | 1,660     | 1,660     | 1,985    | 2,331    | 2,758    | 3,125    | 4,045    | 4,371    | 5,529    | 6,185    | 6,968    |
| 56        | 70        | 93        | 109       | 118       | 147       | 155       | 168       | 211       | 253       | 303       | 303       | 344      | 376      | 432      | 456      | 470      | 499      | 519      | 537      | 560      |
| 549       | 787       | 1,035     | 1,328     | 1,791     | 2,294     | 2,856     | 3,657     | 4,650     | 5,486     | 6,498     | 7,615     | 9,334    | 10,791   | 12,670   | 14,225   | 15,718   | 17,221   | 18,970   | 20,346   | 21,504   |
| 115       | 137       | 236       | 262       | 287       | 346       | 399       | 399       | 441       | 576       | 576       | 689       | 742      | 789      | 789      | 865      | 986      | 1,069    | 1,154    | 1,242    | 1,336    |
| 73        | 90        | 106       | 183       | 255       | 356       | 502       | 670       | 838       | 903       | 1,031     | 1,327     | 1,581    | 1,834    | 2,113    | 2,291    | 2,367    | 2,722    | 3,037    | 3,327    | 3,539    |
| 80        | 140       | 249       | 320       | 377       | 485       | 579       | 579       | 663       | 847       | 937       | 1,073     | 1,177    | 1,358    | 1,358    | 1,455    | 1,738    | 1,915    | 2,003    | 2,260    | 2,469    |
| 21        | 27        | 34        | 37        | 48        | 65        | 90        | 121       | 147       | 173       | 184       | 203       | 228      | 244      | 262      | 281      | 300      | 320      | 332      | 352      | 365      |
| 164       | 227       | 255       | 398       | 504       | 636       | 764       | 764       | 935       | 1,307     | 1,498     | 1,584     | 1,857    | 2,093    | 2,093    | 2,402    | 2,870    | 2,870    | 3,221    | 3,651    | 3,651    |
| 26        | 28        | 30        | 32        | 37        | 45        | 58        | 68        | 94        | 98        | 109       | 126       | 147      | 159      | 173      | 186      | 207      | 225      | 237      | 251      | 269      |
| 38        | 42        | 50        | 52        | 53        | 64        | 73        | 89        | 108       | 120       | 145       | 177       | 214      | 255      | 285      | 323      | 367      | 412      | 478      | 523      | 577      |
| 55        | 65        | 78        | 101       | 108       | 137       | 158       | 187       | 214       | 258       | 314       | 367       | 415      | 479      | 540      | 621      | 669      | 715      | 747      | 788      | 819      |
| 890       | 1,327     | 1,914     | 2,844     | 3,675     | 4,402     | 6,876     | 8,825     | 11,124    | 13,386    | 16,636    | 18,696    | 22,255   | 25,590   | 29,895   | 34,124   | 37,505   | 41,090   | 44,416   | 47,437   | 51,027   |
| 43        | 57        | 65        | 83        | 100       | 112       | 136       | 191       | 208       | 237       | 281       | 315       | 363      | 403      | 495      | 543      | 624      | 686      | 794      | 865      | 989      |
| 109       | 154       | 190       | 245       | 278       | 321       | 535       | 621       | 738       | 920       | 1,044     | 1,113     | 1,279    | 1,458    | 1,514    | 1,742    | 1,836    | 1,953    | 2,087    | 2,318    | 2,456    |
| 7845      | 10356     | 15168     | 21689     | 26358     | 32966     | 38977     | 45934     | 53308     | 59219     | 67131     | 74427     | 84735    | 90279    | 101993   | 111248   | 119435   | 141100   | 138773   | 149316   | 157073   |
| 169       | 247       | 351       | 442       | 564       | 704       | 867       | 1,137     | 1,406     | 1,653     | 1,933     | 2,199     | 2,547    | 2,902    | 3,312    | 3,739    | 4,043    | 4,450    | 4,782    | 5,148    | 5,512    |
| 49        | 53        | 67        | 81        | 106       | 223       | 248       | 322       | 377       | 481       | 481       | 565       | 719      | 879      | 988      | 1,159    | 1,250    | 1,327    | 1,472    | 1,524    | 1,684    |
| 114       | 137       | 161       | 191       | 209       | 266       | 316       | 414       | 479       | 548       | 606       | 690       | 736      | 826      | 899      | 999      | 1,068    | 1,132    | 1,181    | 1,239    | 1,321    |
| 269       | 371       | 479       | 644       | 851       | 1,128     | 1,688     | 2,219     | 2,752     | 3,394     | 4,087     | 4,843     | 5,805    | 7,016    | 8,421    | 10,017   | 11,510   | 12,980   | 14,559   | 16,239   | 18,228   |
| 54        | 66        | 97        | 106       | 124       | 132       | 188       | 203       | 239       | 294       | 479       | 520       | 566      | 681      | 711      | 806      | 922      | 1,170    | 1,414    | 1,450    | 1,939    |
| 125       | 173       | 195       | 298       | 342       | 424       | 456       | 539       | 660       | 774       | 925       | 1,083     | 1,293    | 1,554    | 1,700    | 1,917    | 2,049    | 2,232    | 2,417    | 2,552    | 2,792    |
| 14        | 14        | 21        | 28        | 30        | 41        | 46        | 58        | 68        | 90        | 101       | 108       | 129      | 165      | 187      | 212      | 240      | 288      | 320      | 393      | 447      |
| 228       | 371       | 505       | 615       | 667       | 784       | 957       | 1,203     | 1,373     | 1,537     | 1,834     | 2,239     | 2,240    | 2,845    | 2,880    | 3,103    | 3,633    | 3,803    | 4,139    | 4,362    | 4,635    |
| 401       | 507       | 507       | 507       | 715       | 974       | 1,396     | 1,731     | 2,052     | 2,552     | 2,877     | 3,266     | 3,997    | 4,669    | 5,330    | 6,110    | 6,812    | 7,276    | 8,262    | 9,353    | 10,230   |
| 102       | 125       | 169       | 280       | 298       | 346       | 402       | 466       | 588       | 789       | 806       | 934       | 1,012    | 1,165    | 1,246    | 1,428    | 1,605    | 1,716    | 1,804    | 1,916    | 2,061    |
| 114       | 152       | 254       | 290       | 391       | 460       | 604       | 604       | 739       | 1,020     | 1,020     | 1,484     | 1,706    | 2,012    | 2,012    | 2,407    | 2,878    | 3,333    | 3,645    | 4,042    | 4,509    |
| 29        | 49        | 52        | 75        | 95        | 123       | 156       | 184       | 211       | 235       | 256       | 293       | 321      | 338      | 389      | 461      | 512      | 543      | 575      | 605      | 628      |
| 1,524     | 1,793     | 1,996     | 2,221     | 2,469     | 2,580     | 3,207     | 3,723     | 4,310     | 4,506     | 4,896     | 4,896     | 5,319    | 5,683    | 6,966    | 7,591    | 6,973    | 7,318    | 8,682    | 9,097    | 9,608    |
| 206       | 281       | 381       | 416       | 457       | 585       | 707       | 842       | 989       | 989       | 1,221     | 1,351     | 1,550    | 1,730    | 1,916    | 2,112    | 2,267    | 2,440    | 2,578    | 2,756    | 2,885    |
| 8         | 12        | 16        | 20        | 39        | 51        | 76        | 96        | 113       | 124       | 145       | 162       | 191      | 217      | 237      | 282      | 324      | 345      | 412      | 412      | 523      |
| 22        | 24        | 24        | 26        | 30        | 44        | 55        | 73        | 84        | 87        | 95        | 120       | 137      | 150      | 166      | 187      | 200      | 212      | 221      | 230      | 239      |

| 4/10/2020 | 4/11/2020 | 4/12/2020 | 4/13/2020 | 4/14/2020 | 4/15/2020 | 4/16/2020 | 4/17/2020 | 4/18/2020 | 4/19/2020 | 4/20/2020 | 4/21/2020 | 4/22/2020 | 4/23/2020 | 4/24/2020 | 4/25/2020 | 4/26/2020 | 4/27/2020 | 4/28/2020 | 4/29/2020 |
|-----------|-----------|-----------|-----------|-----------|-----------|-----------|-----------|-----------|-----------|-----------|-----------|-----------|-----------|-----------|-----------|-----------|-----------|-----------|-----------|
| 246       | 257       | 272       | 277       | 285       | 293       | 300       | 309       | 314       | 319       | 321       | 329       | 335       | 337       | 339       | 339       | 341       | 345       | 351       | 355       |
| 3,008     | 3,262     | 3,583     | 3,803     | 3,953     | 4,241     | 4,404     | 4,572     | 4,723     | 4,946     | 5,424     | 5,668     | 5,831     | 6,071     | 6,026     | 6,213     | 6,627     | 6,539     | 6,947     | 7,105     |
| 1,202     | 1,234     | 1,307     | 1,410     | 1,498     | 1,583     | 1,635     | 1,702     | 1,777     | 1,781     | 1,964     | 2,262     | 2,281     | 2,465     | 2,810     | 2,909     | 2,941     | 3,055     | 3,121     | 3,192     |
| 3,112     | 3,393     | 3,539     | 3,702     | 3,806     | 3,962     | 4,234     | 4,507     | 4,719     | 4,929     | 5,064     | 5,251     | 5,459     | 5,769     | 6,045     | 6,280     | 6,526     | 6,716     | 6,948     | 7,202     |
| 19,472    | 20,615    | 21,794    | 22,348    | 23,338    | 24,424    | 26,182    | 27,528    | 28,963    | 28,963    | 30,978    | 33,261    | 35,396    | 37,369    | 39,254    | 41,137    | 42,164    | 43,464    | 45,031    | 46,500    |
| 6,365     | 6,893     | 7,303     | 7,691     | 7,941     | 8,280     | 8,582     | 9,047     | 9,433     | 9,634     | 10,019    | 10,368    | 10,825    | 11,182    | 12,184    | 12,868    | 13,350    | 13,798    | 14,238    | 14,675    |
| 10,131    | 11,510    | 12,035    | 13,381    | 13,989    | 14,755    | 15,884    | 16,809    | 17,550    | 17,962    | 19,815    | 20,360    | 22,469    | 23,100    | 23,921    | 24,582    | 25,269    | 25,997    | 26,312    | 26,767    |
| 1,660     | 1,778     | 1,875     | 1,955     | 2,058     | 2,197     | 2,350     | 2,476     | 2,666     | 2,793     | 2,927     | 3,098     | 3,206     | 3,361     | 3,528     | 3,699     | 3,841     | 3,892     | 3,994     | 4,106     |
| 1,326     | 1,479     | 1,625     | 1,761     | 1,926     | 2,014     | 2,075     | 2,323     | 2,538     | 2,745     | 2,745     | 3,200     | 3,308     | 3,442     | 3,442     | 3,576     | 4,162     | 4,575     | 4,655     | 4,734     |
| 17,448    | 18,445    | 19,337    | 20,394    | 20,984    | 21,865    | 22,674    | 24,066    | 24,797    | 25,598    | 26,329    | 27,127    | 27,791    | 28,843    | 29,707    | 29,996    | 30,680    | 31,290    | 31,986    | 32,318    |
| 11,318    | 12,261    | 13,012    | 13,621    | 14,766    | 15,409    | 16,451    | 16,658    | 17,014    | 18,781    | 19,630    | 20,607    | 20,769    | 21,681    | 22,183    | 22,225    | 23,410    | 23,801    | 24,609    | 25,324    |
| 409       | 452       | 465       | 504       | 517       | 517       | 541       | 553       | 574       | 580       | 584       | 547       | 537       | 540       | 601       | 604       | 550       | 607       | 553       | 557       |
| 1,388     | 1,510     | 1,587     | 1,710     | 1,899     | 1,995     | 2,141     | 2,332     | 2,513     | 2,902     | 3,159     | 3,641     | 3,748     | 3,924     | 4,445     | 5,092     | 5,475     | 5,868     | 6,376     | 6,843     |
| 1,396     | 1,407     | 1,458     | 1,486     | 1,486     | 1,587     | 1,609     | 1,655     | 1,668     | 1,672     | 1,736     | 1,766     | 1,802     | 1,836     | 1,870     | 1,887     | 1,897     | 1,917     | 1,952     | 1,984     |
| 17,887    | 19,180    | 20,852    | 22,025    | 23,247    | 24,593    | 25,733    | 27,575    | 29,160    | 30,557    | 31,508    | 33,059    | 35,108    | 36,934    | 39,658    | 41,777    | 43,903    | 45,883    | 48,102    | 50,355    |
| 6,907     | 7,435     | 7,928     | 8,236     | 8,527     | 8,955     | 9,542     | 10,154    | 10,641    | 11,210    | 11,686    | 12,097    | 12,438    | 13,039    | 13,680    | 14,395    | 15,012    | 15,961    | 16,588    | 17,182    |
| 1,241     | 1,279     | 1,377     | 1,376     | 1,477     | 1,494     | 1,588     | 1,760     | 1,811     | 1,849     | 1,986     | 2,025     | 2,211     | 2,482     | 2,777     | 3,056     | 3,174     | 3,328     | 3,491     | 3,738     |
| 1,693     | 1,840     | 1,963     | 2,048     | 2,210     | 2,291     | 2,429     | 2,522     | 2,707     | 2,960     | 3,050     | 3,192     | 3,373     | 3,481     | 3,779     | 3,905     | 4,074     | 4,146     | 4,375     | 4,539     |
| 19,253    | 20,014    | 20,595    | 21,016    | 21,518    | 21,951    | 22,532    | 23,118    | 23,580    | 23,928    | 24,523    | 24,854    | 25,317    | 25,798    | 26,140    | 26,512    | 26,832    | 27,111    | 27,329    | 27,703    |
| 20,845    | 23,918    | 25,475    | 26,867    | 28,163    | 29,918    | 32,181    | 34,402    | 36,372    | 38,077    | 39,643    | 41,199    | 42,944    | 46,023    | 50,969    | 53,348    | 54,938    | 56,462    | 58,302    | 60,265    |
| 6,968     | 7,694     | 8,936     | 9,472     | 10,032    | 10,784    | 11,572    | 11,572    | 12,308    | 13,684    | 14,193    | 14,775    | 15,737    | 16,616    | 16,616    | 17,766    | 19,487    | 20,113    | 20,849    | 21,742    |
| 583       | 616       | 633       | 698       | 734       | 770       | 796       | 827       | 847       | 867       | 875       | 888       | 907       | 937       | 965       | 990       | 1,023     | 1,040     | 1,056     | 1,095     |
| 22,562    | 23,853    | 24,638    | 25,635    | 27,001    | 28,059    | 29,263    | 29,952    | 30,717    | 31,424    | 32,000    | 32,967    | 33,966    | 35,291    | 36,627    | 37,184    | 37,778    | 38,210    | 39,262    | 40,399    |
| 1,336     | 1,514     | 1,621     | 1,695     | 1,809     | 1,862     | 2,013     | 2,174     | 2,213     | 2,470     | 2,567     | 2,721     | 2,721     | 3,185     | 3,185     | 3,446     | 3,602     | 4,181     | 4,645     | 5,136     |
| 3,799     | 4,024     | 4,160     | 4,388     | 4,686     | 4,895     | 5,111     | 5,283     | 5,517     | 5,667     | 5,807     | 5,941     | 6,137     | 6,321     | 6,625     | 6,826     | 6,997     | 7,171     | 7,303     | 7,425     |
| 2,469     | 2,642     | 2,942     | 3,087     | 3,360     | 3,624     | 3,793     | 3,793     | 3,974     | 4,512     | 4,716     | 4,716     | 5,153     | 5,434     | 5,434     | 5,718     | 6,094     | 6,342     | 6,569     | 6,569     |
| 365       | 377       | 394       | 398       | 404       | 415       | 422       | 422       | 426       | 433       | 437       | 439       | 442       | 444       | 444       | 445       | 449       | 451       | 451       | 451       |
| 3,908     | 4,312     | 4,520     | 4,816     | 5,024     | 5,123     | 5,465     | 5,859     | 6,140     | 6,493     | 6,764     | 6,951     | 7,220     | 7,608     | 8,052     | 8,623     | 8,830     | 9,142     | 9,568     | 9,948     |
| 278       | 293       | 308       | 331       | 341       | 365       | 393       | 439       | 528       | 585       | 627       | 644       | 679       | 709       | 748       | 803       | 867       | 942       | 991       | 1,033     |
| 648       | 704       | 814       | 871       | 901       | 952       | 1,066     | 1,138     | 1,287     | 1,474     | 1,648     | 1,722     | 1,813     | 2,124     | 2,421     | 2,732     | 3,028     | 3,358     | 3,374     | 3,784     |
| 885       | 929       | 985       | 1,020     | 1,091     | 1,139     | 1,211     | 1,287     | 1,342     | 1,392     | 1,447     | 1,491     | 1,588     | 1,670     | 1,720     | 1,787     | 1,864     | 1,938     | 2,010     | 2,054     |
| 54,588    | 58,151    | 61,850    | 64,584    | 68,824    | 71,030    | 75,317    | 78,467    | 81,436    | 85,301    | 88,806    | 92,387    | 95,865    | 99,989    | 102,196   | 105,523   | 109,038   | 111,188   | 113,856   | 116,264   |
| 1,091     | 1,174     | 1,245     | 1,345     | 1,407     | 1,484     | 1,597     | 1,711     | 1,798     | 1,845     | 1,971     | 2,072     | 2,210     | 2,379     | 2,521     | 2,660     | 2,726     | 2,823     | 2,974     | 3,213     |
| 2,584     | 2,700     | 2,836     | 2,971     | 3,088     | 3,211     | 3,321     | 3,524     | 3,626     | 3,728     | 3,830     | 3,937     | 4,081     | 4,208     | 4,398     | 4,539     | 4,602     | 4,690     | 4,812     | 4,898     |
| 170884    | 180458    | 188694    | 195081    | 201834    | 211550    | 216703    | 224438    | 233570    | 238138    | 245580    | 250800    | 253219    | 263744    | 267256    | 277606    | 282991    | 287607    | 290481    | 294715    |
| 5,878     | 6,250     | 6,518     | 6,975     | 7,280     | 7,791     | 8,414     | 9,107     | 10,222    | 11,602    | 12,919    | 13,725    | 14,117    | 14,694    | 15,169    | 15,587    | 15,963    | 16,325    | 16,769    | 17,303    |
| 1,794     | 1,868     | 1,970     | 2,069     | 2,209     | 2,263     | 2,359     | 2,465     | 2,570     | 2,599     | 2,680     | 2,807     | 2,894     | 3,017     | 3,121     | 3,193     | 3,253     | 3,280     | 3,410     | 3,473     |
| 1,371     | 1,447     | 1,527     | 1,584     | 1,633     | 1,663     | 1,736     | 1,785     | 1,844     | 1,910     | 1,956     | 2,002     | 2,059     | 2,127     | 2,177     | 2,253     | 2,311     | 2,354     | 2,385     | 2,446     |
| 19,980    | 21,656    | 22,833    | 24,199    | 25,345    | 26,490    | 27,735    | 29,442    | 31,070    | 32,284    | 33,323    | 34,528    | 35,684    | 37,053    | 38,652    | 40,049    | 41,165    | 42,050    | 43,264    | 44,366    |
| 2,015     | 2,349     | 2,665     | 2,976     | 3,369     | 3,529     | 3,969     | 4,177     | 4,491     | 4,706     | 5,090     | 5,716     | 6,012     | 6,256     | 6,699     | 7,129     | 7,439     | 7,708     | 7,926     | 8,247     |
| 3,065     | 3,207     | 3,319     | 3,439     | 3,553     | 3,656     | 3,931     | 4,086     | 4,246     | 4,377     | 4,439     | 4,608     | 4,761     | 4,917     | 5,070     | 5,253     | 5,490     | 5,613     | 5,735     | 5,881     |
| 536       | 626       | 730       | 868       | 1,168     | 1,168     | 1,311     | 1,411     | 1,542     | 1,635     | 1,685     | 1,754     | 1,858     | 1,956     | 2,040     | 2,147     | 2,212     | 2,245     | 2,313     | 2,373     |
| 4,863     | 4,863     | 5,308     | 5,610     | 5,823     | 5,836     | 6,262     | 6,330     | 6,763     | 6,796     | 7,239     | 7,394     | 7,572     | 8,281     | 8,742     | 8,882     | 9,698     | 9,952     | 10,087    | 10,132    |
| 11,671    | 12,561    | 13,484    | 13,906    | 14,624    | 15,492    | 16,455    | 17,371    | 18,260    | 18,923    | 19,458    | 20,196    | 21,069    | 21,944    | 22,806    | 23,773    | 24,631    | 25,297    | 26,171    | 27,054    |
| 2,102     | 2,206     | 2,338     | 2,392     | 2,453     | 2,637     | 2,760     | 2,805     | 2,946     | 3,151     | 3,259     | 3,369     | 3,540     | 3,722     | 3,782     | 3,948     | 4,214     | 4,307     | 4,423     | 4,605     |
| 4,509     | 5,077     | 5,747     | 6,171     | 6,500     | 6,889     | 7,491     | 8,053     | 8,053     | 8,990     | 9,630     | 9,630     | 10,998    | 11,594    | 12,366    | 12,366    | 13,535    | 14,339    | 14,961    | 15,846    |
| 679       | 711       | 727       | 748       | 750       | 759       | 768       | 779       | 803       | 812       | 816       | 818       | 823       | 825       | 827       | 843       | 851       | 855       | 862       | 862       |
| 9,887     | 10,224    | 10,411    | 10,538    | 10,694    | 10,783    | 11,152    | 11,445    | 11,802    | 11,790    | 12,085    | 12,282    | 12,494    | 12,753    | 12,977    | 13,319    | 13,521    | 13,686    | 13,842    | 14,070    |
| 3,068     | 3,221     | 3,341     | 3,428     | 3,555     | 3,721     | 3,875     | 4,045     | 4,199     | 4,346     | 4,499     | 4,620     | 4,845     | 5,052     | 5,356     | 5,687     | 5,911     | 6,081     | 6,289     | 6,520     |
| 574       | 591       | 611       | 626       | 694       | 718       | 739       | 775       | 825       | 863       | 902       | 914       | 963       | 981       | 1,010     | 1,025     | 1,053     | 1,077     | 1,095     | 1,109     |
| 253       | 261       | 270       | 373       | 494       | 393       | 401       | 412       | 423       | 426       | 428       | 441       | 447       | 453       | 473       | 491       | 502       | 520       | 536       | 544       |



| 4/30/2020 | 5/1/2020 | 5/2/2020 | 5/3/2020 | 5/4/2020 | 5/5/2020 | 5/6/2020 | 5/7/2020 | 5/8/2020 | 5/9/2020 | 5/10/2020 | 5/11/2020 | 5/12/2020 | 5/13/2020 | 5/14/2020 | 5/15/2020 | 5/16/2020 | 5/17/2020 | 5/18/2020 | 5/19/2020 | 5/20/2020 |
|-----------|----------|----------|----------|----------|----------|----------|----------|----------|----------|-----------|-----------|-----------|-----------|-----------|-----------|-----------|-----------|-----------|-----------|-----------|
| 355       | 364      | 365      | 368      | 370      | 371      | 372      | 374      | 377      | 378      | 379       | 381       | 383       | 383       | 387       | 388       | 392       | 396       | 399       | 399       | 402       |
| 7,306     | 7,294    | 7,611    | 7,888    | 8,312    | 8,679    | 8,691    | 9,243    | 9,639    | 9,923    | 10,145    | 10,413    | 10,665    | 10,936    | 11,338    | 11,642    | 11,981    | 11,771    | 12,587    | 12,376    | 13,300    |
| 3,255     | 3,310    | 3,372    | 3,431    | 3,469    | 3,496    | 3,611    | 3,665    | 3,747    | 3,984    | 3,984     | 4,043     | 4,164     | 4,236     | 4,348     | 4,463     | 4,578     | 4,759     | 4,813     | 4,923     | 5,003     |
| 7,648     | 7,962    | 8,364    | 8,640    | 8,919    | 9,305    | 9,707    | 9,945    | 10,526   | 10,960   | 11,119    | 11,380    | 11,736    | 12,176    | 12,674    | 13,169    | 13,631    | 13,937    | 14,170    | 14,566    | 14,897    |
| 48,917    | 50,442   | 52,197   | 53,616   | 54,937   | 56,212   | 58,815   | 60,614   | 62,512   | 64,561   | 66,680    | 67,939    | 69,382    | 71,141    | 73,164    | 74,936    | 76,793    | 78,839    | 80,430    | 81,795    | 84,057    |
| 15,182    | 15,668   | 16,120   | 16,534   | 16,878   | 17,317   | 17,738   | 18,318   | 18,793   | 19,316   | 19,632    | 19,735    | 20,091    | 20,401    | 20,762    | 21,131    | 21,511    | 21,797    | 22,095    | 22,399    | 22,752    |
| 27,700    | 28,764   | 29,287   | 29,312   | 29,973   | 30,621   | 30,995   | 31,784   | 32,411   | 32,984   | 33,554    | 33,765    | 34,333    | 34,855    | 35,464    | 36,085    | 36,703    | 37,419    | 38,116    | 38,430    | 39,017    |
| 4,323     | 4,658    | 4,797    | 5,016    | 5,170    | 5,322    | 5,461    | 5,654    | 5,899    | 6,102    | 6,272     | 6,389     | 6,485     | 6,584     | 6,736     | 6,871     | 7,042     | 7,123     | 7,270     | 7,434     | 7,551     |
| 4,734     | 4,918    | 5,038    | 5,208    | 5,288    | 5,371    | 5,778    | 6,111    | 6,111    | 6,447    | 6,565     | 6,741     | 6,952     | 7,223     | 7,373     | 7,373     | 7,547     | 7,869     | 8,037     | 8,194     | 8,386     |
| 33,690    | 34,728   | 35,463   | 35,969   | 36,897   | 37,439   | 38,002   | 38,828   | 39,199   | 40,001   | 39,888    | 40,982    | 41,923    | 42,402    | 43,210    | 42,940    | 44,811    | 45,588    | 46,442    | 46,944    | 47,471    |
| 26,095    | 27,733   | 28,338   | 28,621   | 29,196   | 29,602   | 30,750   | 31,383   | 32,609   | 32,590   | 32,980    | 33,995    | 34,731    | 35,335    | 35,858    | 36,680    | 37,147    | 37,642    | 38,081    | 38,753    | 39,702    |
| 562       | 619      | 620      | 557      | 558      | 570      | 626      | 576      | 576      | 579      | 580       | 582       | 583       | 587       | 586       | 587       | 588       | 589       | 589       | 591       | 593       |
| 7,145     | 7,884    | 8,641    | 9,169    | 9,703    | 10,111   | 10,404   | 11,059   | 11,457   | 11,671   | 11,959    | 12,373    | 12,912    | 13,289    | 13,675    | 14,049    | 14,328    | 14,651    | 15,082    | 15,349    | 15,595    |
| 2,015     | 2,035    | 2,061    | 2,061    | 2,106    | 2,127    | 2,158    | 2,178    | 2,205    | 2,230    | 2,230     | 2,260     | 2,293     | 2,324     | 2,351     | 2,389     | 2,419     | 2,419     | 2,455     | 2,476     | 2,506     |
| 52,918    | 56,055   | 58,505   | 61,449   | 63,840   | 65,962   | 68,232   | 70,873   | 73,706   | 76,085   | 77,741    | 79,007    | 83,021    | 84,698    | 87,937    | 90,369    | 92,457    | 94,191    | 96,485    | 98,030    | 100,418   |
| 17,835    | 18,630   | 19,295   | 19,933   | 20,507   | 21,033   | 21,870   | 22,503   | 23,146   | 23,732   | 24,126    | 24,627    | 25,127    | 25,473    | 26,053    | 26,655    | 27,280    | 27,778    | 28,255    | 28,705    | 29,274    |
| 4,238     | 4,449    | 4,746    | 5,030    | 5,245    | 5,458    | 5,734    | 6,144    | 6,501    | 6,751    | 6,984     | 7,116     | 7,116     | 7,468     | 7,468     | 7,886     | 7,886     | 7,886     | 8,340     | 8,340     | 8,539     |
| 4,708     | 4,879    | 4,879    | 5,130    | 5,245    | 5,822    | 5,934    | 6,129    | 6,288    | 6,440    | 6,440     | 6,677     | 6,853     | 7,080     | 7,225     | 7,444     | 7,688     | 7,688     | 7,935     | 8,069     | 8,167     |
| 28,044    | 28,711   | 29,140   | 29,383   | 29,746   | 30,069   | 30,399   | 30,725   | 30,928   | 31,490   | 31,673    | 31,881    | 32,116    | 32,728    | 33,555    | 33,903    | 34,183    | 34,498    | 34,832    | 35,161    | 35,439    |
| 62,205    | 64,311   | 66,263   | 68,087   | 69,087   | 70,271   | 72,025   | 73,721   | 75,333   | 76,743   | 77,793    | 78,462    | 79,332    | 80,497    | 82,182    | 83,421    | 84,933    | 86,010    | 87,052    | 87,925    | 88,970    |
| 23,472    | 23,472   | 24,473   | 26,408   | 27,117   | 28,163   | 28,163   | 30,485   | 31,534   | 32,587   | 33,373    | 34,061    | 34,812    | 35,903    | 36,986    | 37,968    | 38,804    | 38,804    | 41,546    | 42,323    | 43,531    |
| 1,123     | 1,123    | 1,152    | 1,205    | 1,226    | 1,254    | 1,254    | 1,374    | 1,374    | 1,434    | 1,457     | 1,462     | 1,515     | 1,515     | 1,603     | 1,648     | 1,687     | 1,713     | 1,741     | 1,819     | 1,877     |
| 41,379    | 42,356   | 43,207   | 43,754   | 43,950   | 44,397   | 45,054   | 45,646   | 46,326   | 46,756   | 47,138    | 47,552    | 48,021    | 48,391    | 49,582    | 50,079    | 50,504    | 51,142    | 51,915    | 52,350    | 53,009    |
| 5,136     | 5,730    | 6,228    | 7,238    | 7,234    | 7,851    | 8,579    | 10,088   | 10,088   | 11,271   | 11,271    | 11,799    | 12,917    | 12,917    | 14,240    | 14,240    | 15,668    | 16,372    | 17,029    | 17,670    | 17,670    |
| 7,562     | 7,835    | 8,154    | 8,386    | 8,754    | 8,916    | 9,102    | 9,341    | 9,489    | 9,666    | 9,844     | 9,918     | 10,006    | 10,142    | 10,316    | 10,456    | 10,675    | 10,789    | 10,945    | 11,080    | 11,232    |
| 7,212     | 7,212    | 7,441    | 7,877    | 8,207    | 8,422    | 8,424    | 9,090    | 9,378    | 9,501    | 9,674     | 9,908     | 10,093    | 10,483    | 10,801    | 11,123    | 11,296    | 11,432    | 11,704    | 11,967    | 12,222    |
| 453       | 453      | 455      | 457      | 457      | 456      | 456      | 459      | 458      | 458      | 458       | 459       | 459       | 462       | 466       | 466       | 468       | 470       | 470       | 478       | 478       |
| 10,509    | 10,923   | 11,509   | 11,664   | 11,848   | 12,256   | 12,758   | 13,397   | 13,868   | 14,360   | 14,764    | 15,045    | 15,346    | 15,816    | 16,507    | 17,129    | 17,982    | 18,512    | 19,023    | 19,700    | 20,122    |
| 1,067     | 1,107    | 1,153    | 1,191    | 1,225    | 1,266    | 1,323    | 1,371    | 1,425    | 1,464    | 1,491     | 1,518     | 1,571     | 1,647     | 1,712     | 1,761     | 1,848     | 1,900     | 1,931     | 1,994     | 2,095     |
| 4,281     | 4,838    | 5,326    | 5,659    | 6,083    | 6,438    | 6,771    | 7,190    | 7,831    | 8,234    | 8,315     | 8,572     | 8,692     | 9,075     | 9,416     | 9,772     | 10,220    | 10,348    | 10,625    | 10,846    | 11,122    |
| 2,146     | 2,310    | 2,429    | 2,518    | 2,588    | 2,636    | 2,740    | 2,843    | 2,947    | 3,011    | 3,071     | 3,160     | 3,239     | 3,299     | 3,382     | 3,464     | 3,556     | 3,596     | 3,652     | 3,721     | 3,868     |
| 118,652   | 121,190  | 123,717  | 126,744  | 128,269  | 130,593  | 131,890  | 133,635  | 135,454  | 137,085  | 138,532   | 139,945   | 140,743   | 141,560   | 142,704   | 143,905   | 145,089   | 146,334   | 148,039   | 149,013   | 150,399   |
| 3,411     | 3,513    | 3,732    | 3,850    | 4,031    | 4,138    | 4,291    | 4,493    | 4,673    | 4,778    | 4,863     | 5,069     | 5,212     | 5,364     | 5,503     | 5,662     | 5,847     | 5,938     | 6,096     | 6,192     | 6,317     |
| 5,007     | 5,227    | 5,311    | 5,426    | 5,500    | 5,603    | 5,663    | 5,766    | 5,884    | 6,028    | 6,109     | 6,163     | 6,322     | 6,405     | 6,499     | 6,629     | 6,662     | 6,872     | 6,921     | 7,046     | 7,182     |
| 299,106   | 303,129  | 307,506  | 312,618  | 313,836  | 316,041  | 318,915  | 321,962  | 324,710  | 328,599  | 334,640   | 336,617   | 336,681   | 338,617   | 340,799   | 343,304   | 351,872   | 347,936   | 349,214   | 356,179   | 357,431   |
| 18,027    | 18,743   | 19,335   | 19,914   | 20,474   | 20,969   | 21,576   | 22,131   | 23,016   | 23,697   | 24,081    | 24,777    | 25,250    | 25,721    | 26,357    | 26,954    | 27,474    | 27,923    | 28,272    | 28,952    | 29,436    |
| 3,618     | 3,748    | 3,851    | 3,972    | 4,044    | 4,054    | 4,201    | 4,210    | 4,210    | 4,335    | 4,589     | 4,439     | 4,439     | 4,741     | 4,861     | 4,971     | 4,861     | 5,310     | 5,247     | 5,407     | 5,407     |
| 2,510     | 2,579    | 2,635    | 2,680    | 2,759    | 2,839    | 2,916    | 2,989    | 3,068    | 3,160    | 3,228     | 3,286     | 3,358     | 3,416     | 3,479     | 3,541     | 3,612     | 3,623     | 3,687     | 3,726     | 3,801     |
| 45,763    | 46,971   | 48,305   | 49,267   | 50,092   | 50,957   | 51,845   | 52,915   | 54,238   | 55,316   | 56,611    | 57,154    | 57,991    | 58,698    | 59,636    | 60,622    | 61,611    | 62,234    | 63,666    | 63,936    | 64,412    |
| 8,621     | 8,962    | 9,289    | 9,477    | 9,652    | 9,933    | 10,205   | 10,530   | 10,779   | 10,989   | 11,274    | 11,450    | 11,614    | 11,835    | 12,016    | 12,219    | 12,434    | 12,674    | 12,795    | 12,951    | 13,356    |
| 6,095     | 6,258    | 6,489    | 6,626    | 6,757    | 6,841    | 6,936    | 7,142    | 7,367    | 7,531    | 7,653     | 7,792     | 7,927     | 8,030     | 8,189     | 8,407     | 8,661     | 8,816     | 8,942     | 9,056     | 9,175     |
| 2,449     | 2,525    | 2,588    | 2,631    | 2,668    | 2,721    | 2,779    | 2,905    | 3,144    | 3,393    | 3,517     | 3,614     | 3,663     | 3,732     | 3,792     | 3,887     | 3,959     | 3,987     | 4,027     | 4,085     | 4,177     |
| 10,735    | 11,891   | 12,661   | 13,243   | 13,571   | 13,690   | 13,938   | 14,166   | 14,512   | 14,843   | 15,060    | 15,622    | 16,190    | 16,451    | 16,784    | 17,052    | 17,374    | 17,495    | 18,121    | 18,491    | 18,646    |
| 28,087    | 29,229   | 30,552   | 31,548   | 32,332   | 33,369   | 34,422   | 35,390   | 36,609   | 37,860   | 38,869    | 39,869    | 41,048    | 42,403    | 43,851    | 45,198    | 46,999    | 47,784    | 48,693    | 49,912    | 51,323    |
| 4,753     | 4,828    | 4,981    | 5,261    | 5,406    | 5,530    | 5,595    | 5,794    | 6,041    | 6,234    | 6,317     | 6,395     | 6,548     | 6,675     | 6,837     | 7,012     | 7,166     | 7,305     | 7,459     | 7,595     | 7,808     |
| 16,901    | 16,901   | 17,731   | 19,492   | 19,492   | 20,256   | 20,256   | 22,342   | 22,342   | 23,196   | 25,070    | 25,800    | 26,746    | 27,813    | 28,672    | 29,683    | 30,388    | 31,140    | 32,145    | 32,908    | 34,137    |
| 866       | 879      | 886      | 897      | 902      | 906      | 908      | 916      | 918      | 921      | 927       | 926       | 927       | 929       | 933       | 933       | 932       | 940       | 940       | 944       | 945       |
| 14,327    | 14,637   | 15,003   | 15,185   | 15,462   | 15,594   | 15,905   | 16,231   | 16,388   | 16,674   | 16,891    | 17,122    | 17,330    | 17,512    | 17,773    | 17,951    | 18,287    | 18,433    | 18,611    | 18,811    | 18,971    |
| 6,854     | 7,314    | 7,660    | 7,964    | 8,236    | 8,566    | 8,901    | 9,215    | 9,590    | 9,939    | 10,219    | 10,418    | 10,611    | 10,902    | 11,275    | 11,685    | 12,187    | 12,543    | 12,687    | 12,885    | 13,431    |
| 1,125     | 1,151    | 1,184    | 1,195    | 1,224    | 1,242    | 1,276    | 1,297    | 1,323    | 1,347    | 1,362     | 1,369     | 1,378     | 1,404     | 1,434     | 1,447     | 1,470     | 1,490     | 1,502     | 1,514     | 1,567     |
| 559       | 566      | 579      | 586      | 596      | 604      | 631      | 635      | 644      | 653      | 662       | 669       | 675       | 688       | 701       | 716       | 741       | 754       | 766       | 776       | 787       |

| 5/21/2020 | 5/22/2020 | 5/23/2020 | 5/24/2020 | 5/25/2020 | 5/26/2020 | 5/27/2020 | 5/28/2020 | 5/29/2020 | 5/30/2020 | 5/31/2020 | 6/1/2020 | 6/2/2020 | 6/3/2020 | 6/4/2020 | 6/5/2020 | 6/6/2020 | 6/7/2020 | 6/8/2020 | 6/9/2020 | 6/10/2020 |
|-----------|-----------|-----------|-----------|-----------|-----------|-----------|-----------|-----------|-----------|-----------|----------|----------|----------|----------|----------|----------|----------|----------|----------|-----------|
| 402       | 404       | 408       | 408       | 409       | 411       | 412       | 425       | 430       | 434       | 460       | 467      | 487      | 505      | 513      | 524      | 536      | 544      | 563      | 573      | 593       |
| 13,647    | 13,941    | 14,388    | 14,741    | 15,257    | 15,805    | 16,262    | 16,729    | 17,322    | 17,649    | 18,245    | 18,438   | 18,771   | 18,851   | 19,082   | 19,396   | 20,054   | 20,500   | 21,430   | 21,422   | 22,000    |
| 5,458     | 5,612     | 5,775     | 5,922     | 6,029     | 6,180     | 6,277     | 6,538     | 6,777     | 7,013     | 7,253     | 7,443    | 7,818    | 8,067    | 8,425    | 8,651    | 9,101    | 9,426    | 9,740    | 10,080   | 10,368    |
| 15,315    | 15,608    | 16,039    | 16,339    | 16,561    | 16,783    | 17,262    | 17,763    | 18,465    | 19,255    | 19,936    | 20,123   | 21,250   | 22,223   | 22,753   | 24,332   | 25,451   | 26,889   | 27,678   | 28,296   | 29,852    |
| 86,197    | 88,444    | 90,631    | 92,710    | 94,558    | 96,733    | 98,980    | 101,697   | 103,886   | 106,878   | 110,583   | 113,006  | 115,310  | 117,687  | 119,807  | 122,901  | 126,016  | 128,812  | 131,319  | 133,489  | 136,191   |
| 23,121    | 23,455    | 23,937    | 24,137    | 24,226    | 24,503    | 24,995    | 25,121    | 25,613    | 26,098    | 26,378    | 26,577   | 26,788   | 27,060   | 27,360   | 27,615   | 27,848   | 28,001   | 28,183   | 28,347   | 28,499    |
| 39,208    | 39,640    | 40,022    | 40,468    | 40,873    | 41,303    | 41,288    | 41,559    | 41,762    | 42,022    | 42,201    | 42,740   | 42,979   | 43,091   | 43,239   | 43,460   | 43,818   | 43,968   | 44,092   | 44,179   | 44,347    |
| 7,788     | 7,893     | 7,966     | 8,110     | 8,225     | 8,334     | 8,406     | 8,492     | 8,538     | 8,717     | 8,801     | 8,857    | 8,886    | 9,016    | 9,120    | 9,199    | 9,269    | 9,332    | 9,389    | 9,474    | 9,537     |
| 8,529     | 8,690     | 8,690     | 8,809     | 9,067     | 9,096     | 9,171     | 9,236     | 9,422     | 9,498     | 9,606     | 9,685    | 9,712    | 9,746    | 9,773    | 9,845    | 9,942    | 9,972    | 10,020   | 10,056   | 10,107    |
| 48,675    | 49,451    | 50,127    | 50,867    | 51,746    | 52,255    | 52,634    | 51,918    | 53,114    | 54,029    | 54,764    | 55,415   | 56,001   | 57,293   | 58,701   | 59,993   | 61,246   | 62,416   | 63,378   | 64,448   | 65,779    |
| 40,460    | 41,482    | 42,145    | 42,846    | 43,369    | 43,794    | 44,447    | 45,226    | 45,711    | 46,301    | 47,009    | 47,656   | 48,207   | 48,894   | 49,847   | 50,621   | 51,309   | 51,898   | 52,497   | 53,249   | 53,980    |
| 596       | 594       | 595       | 595       | 595       | 595       | 596       | 601       | 603       | 606       | 607       | 607      | 610      | 616      | 619      | 625      | 634      | 636      | 637      | 644      | 647       |
| 16,170    | 16,504    | 16,898    | 17,250    | 17,577    | 17,703    | 18,357    | 18,585    | 18,956    | 19,244    | 19,552    | 19,698   | 20,015   | 20,108   | 20,804   | 21,146   | 21,478   | 21,588   | 21,988   | 22,237   | 22,603    |
| 2,534     | 2,595     | 2,626     | 2,626     | 2,684     | 2,699     | 2,731     | 2,769     | 2,803     | 2,839     | 2,839     | 2,906    | 2,933    | 2,990    | 3,054    | 3,111    | 3,139    | 3,139    | 3,189    | 3,220    | 3,260     |
| 102,686   | 105,444   | 107,796   | 110,304   | 112,017   | 113,195   | 114,306   | 115,833   | 117,455   | 118,917   | 120,266   | 121,234  | 122,848  | 123,830  | 124,759  | 125,915  | 126,890  | 127,757  | 129,139  | 129,936  | 130,561   |
| 29,936    | 30,409    | 30,901    | 31,376    | 31,715    | 32,078    | 32,437    | 33,068    | 33,558    | 34,211    | 34,574    | 34,830   | 35,237   | 35,712   | 36,096   | 36,578   | 36,997   | 37,397   | 37,623   | 38,033   | 38,337    |
| 8,539     | 8,958     | 8,958     | 8,958     | 9,218     | 9,218     | 9,337     | 9,337     | 9,719     | 9,719     | 9,719     | 10,011   | 10,011   | 10,170   | 10,170   | 10,393   | 10,393   | 10,393   | 10,650   | 10,650   | 10,812    |
| 8,286     | 8,426     | 8,571     | 8,571     | 8,571     | 8,951     | 9,077     | 9,184     | 9,464     | 9,704     | 9,704     | 10,046   | 10,185   | 10,410   | 10,705   | 10,977   | 11,287   | 11,287   | 11,476   | 11,708   | 11,883    |
| 36,627    | 37,048    | 37,163    | 37,292    | 37,914    | 38,159    | 38,602    | 38,907    | 39,682    | 39,916    | 40,452    | 40,857   | 41,133   | 41,562   | 41,989   | 42,486   | 42,816   | 43,050   | 43,612   | 44,030   |           |
| 90,084    | 90,899    | 91,662    | 92,675    | 93,271    | 93,693    | 94,220    | 94,895    | 95,512    | 96,301    | 96,965    | 100,805  | 101,163  | 101,592  | 102,063  | 102,557  | 103,132  | 103,436  | 103,626  | 103,889  | 104,156   |
| 44,424    | 45,495    | 46,313    | 47,152    | 47,687    | 48,423    | 49,709    | 50,988    | 52,015    | 52,778    | 53,327    | 54,175   | 54,982   | 55,858   | 56,770   | 57,482   | 57,973   | 58,404   | 58,904   | 59,465   | 60,197    |
| 1,948     | 1,948     | 2,013     | 2,074     | 2,109     | 2,109     | 2,189     | 2,226     | 2,282     | 2,325     | 2,349     | 2,377    | 2,418    | 2,418    | 2,446    | 2,482    | 2,570    | 2,570    | 2,588    | 2,606    | 2,667     |
| 53,510    | 53,913    | 54,365    | 54,679    | 54,881    | 55,104    | 55,608    | 56,014    | 56,621    | 56,884    | 57,397    | 57,532   | 57,731   | 58,035   | 58,241   | 63,539   | 63,983   | 64,413   | 64,701   | 64,998   | 65,182    |
| 19,005    | 19,845    | 19,845    | 20,573    | 21,960    | 22,464    | 22,464    | 23,531    | 23,531    | 24,850    | 25,208    | 25,208   | 25,508   | 25,870   | 26,273   | 27,501   | 27,886   | 28,224   | 28,523   | 28,869   | 29,316    |
| 11,340    | 11,558    | 11,752    | 11,988    | 12,167    | 12,291    | 12,492    | 12,673    | 12,795    | 12,962    | 13,147    | 13,327   | 13,575   | 13,767   | 14,057   | 14,253   | 14,442   | 14,553   | 14,734   | 14,913   | 15,187    |
| 12,624    | 13,005    | 13,252    | 13,458    | 13,731    | 14,044    | 14,372    | 14,790    | 15,230    | 15,501    | 15,752    | 16,021   | 16,322   | 16,560   | 16,560   | 16,769   | 17,270   | 17,768   | 17,768   | 18,483   | 18,483    |
| 479       | 479       | 479       | 479       | 479       | 479       | 485       | 493       | 505       | 505       | 515       | 523      | 525      | 539      | 539      | 540      | 540      | 548      | 548      | 554      | 561       |
| 20,860    | 21,618    | 22,725    | 23,222    | 23,964    | 24,140    | 24,628    | 25,412    | 26,488    | 27,673    | 28,589    | 29,263   | 29,889   | 30,777   | 31,966   | 33,255   | 34,625   | 35,555   | 36,484   | 37,160   | 38,171    |
| 2,229     | 2,317     | 2,365     | 2,418     | 2,457     | 2,422     | 2,439     | 2,481     | 2,520     | 2,554     | 2,577     | 2,625    | 2,646    | 2,679    | 2,706    | 2,745    | 2,816    | 2,861    | 2,880    | 2,901    | 2,941     |
| 11,425    | 11,662    | 11,989    | 12,134    | 12,355    | 12,619    | 12,976    | 13,261    | 13,654    | 13,905    | 14,101    | 14,345   | 14,611   | 14,866   | 15,117   | 15,379   | 15,543   | 15,634   | 15,752   | 15,883   | 16,025    |
| 3,935     | 4,014     | 4,089     | 4,149     | 4,197     | 4,231     | 4,286     | 4,386     | 4,492     | 4,545     | 4,651     | 4,685    | 4,749    | 4,795    | 4,876    | 4,953    | 5,019    | 5,043    | 5,079    | 5,132    | 5,178     |
| 151,472   | 152,719   | 153,104   | 154,154   | 155,092   | 155,764   | 156,628   | 157,185   | 158,844   | 159,608   | 160,445   | 160,918  | 161,545  | 162,068  | 162,530  | 163,336  | 163,893  | 164,164  | 164,497  | 164,796  | 165,346   |
| 6,472     | 6,625     | 6,795     | 6,943     | 7,026     | 7,130     | 7,252     | 7,364     | 7,493     | 7,624     | 7,689     | 7,800    | 8,024    | 8,140    | 8,353    | 8,672    | 8,800    | 8,940    | 9,062    | 9,105    | 9,250     |
| 7,271     | 7,401     | 7,696     | 7,786     | 7,888     | 7,998     | 8,113     | 8,225     | 8,350     | 8,495     | 8,610     | 8,688    | 8,830    | 8,951    | 9,090    | 9,285    | 9,460    | 9,649    | 9,805    | 10,030   | 10,164    |
| 353623    | 355621    | 362859    | 358844    | 365405    | 366638    | 367994    | 369460    | 365323    | 366802    | 373022    | 368777   | 375224   | 371019   | 372046   | 373097   | 379322   | 380089   | 380737   | 381505   | 382136    |
| 30,167    | 30,794    | 31,408    | 31,911    | 32,477    | 33,006    | 33,439    | 33,915    | 34,566    | 35,034    | 35,513    | 35,984   | 36,413   | 36,792   | 37,282   | 37,758   | 38,111   | 38,476   | 38,837   | 39,162   | 39,575    |
| 5,503     | 5,503     | 5,543     | 5,691     | 5,860     | 5,974     | 6,051     | 6,104     | 6,238     | 6,280     | 6,280     | 6,347    | 6,427    | 6,582    | 6,707    | 6,820    | 6,921    | 6,921    | 7,072    | 7,163    | 7,218     |
| 3,817     | 3,864     | 3,888     | 3,927     | 3,949     | 3,967     | 4,038     | 4,086     | 4,131     | 4,185     | 4,243     | 4,302    | 4,335    | 4,399    | 4,474    | 4,570    | 4,662    | 4,808    | 4,922    | 4,988    | 5,060     |
| 66,258    | 66,983    | 67,713    | 68,186    | 68,637    | 69,417    | 70,042    | 70,735    | 71,415    | 71,926    | 72,282    | 72,894   | 73,405   | 73,942   | 74,385   | 75,086   | 75,592   | 75,943   | 76,436   | 76,846   | 77,313    |
| 13,571    | 13,736    | 13,952    | 14,065    | 14,065    | 14,210    | 14,353    | 14,494    | 14,635    | 14,819    | 14,928    | 14,991   | 15,112   | 15,219   | 15,325   | 15,441   | 15,441   | 15,441   | 15,642   | 15,691   | 15,756    |
| 9,379     | 9,638     | 9,895     | 10,096    | 10,178    | 10,416    | 10,623    | 10,788    | 11,131    | 11,394    | 11,861    | 12,148   | 12,415   | 12,651   | 13,005   | 13,453   | 13,916   | 14,286   | 14,800   | 15,228   | 15,759    |
| 4,250     | 4,356     | 4,468     | 4,563     | 4,586     | 4,653     | 4,710     | 4,793     | 4,866     | 4,960     | 4,993     | 5,034    | 5,067    | 5,162    | 5,247    | 5,277    | 5,367    | 5,438    | 5,471    | 5,523    | 5,604     |
| 19,073    | 19,510    | 19,909    | 20,269    | 20,731    | 21,089    | 21,441    | 21,822    | 22,236    | 22,720    | 23,159    | 23,709   | 24,543   | 24,990   | 25,289   | 25,690   | 26,248   | 26,561   | 27,129   | 27,759   | 28,061    |
| 52,268    | 53,449    | 54,509    | 55,348    | 55,971    | 56,560    | 57,921    | 59,776    | 61,006    | 62,338    | 64,287    | 64,880   | 66,568   | 68,271   | 69,920   | 71,613   | 73,553   | 74,978   | 75,616   | 77,253   | 79,757    |
| 7,981     | 8,179     | 8,331     | 8,500     | 8,584     | 8,658     | 8,815     | 9,137     | 9,429     | 9,688     | 9,944     | 10,101   | 10,353   | 10,737   | 11,015   | 11,252   | 11,939   | 12,117   | 12,429   | 12,704   | 13,048    |
| 34,950    | 35,749    | 36,244    | 37,727    | 39,342    | 40,249    | 41,401    | 42,533    | 43,611    | 44,607    | 45,398    | 46,239   | 46,905   | 47,856   | 48,532   | 49,397   | 50,681   | 51,251   | 51,738   | 52,177   | 52,647    |
| 950       | 952       | 954       | 956       | 962       | 967       | 971       | 974       | 975       | 977       | 981       | 983      | 988      | 990      | 1,025    | 1,027    | 1,045    | 1,063    | 1,075    | 1,084    | 1,094     |
| 19,117    | 19,265    | 19,585    | 19,828    | 20,065    | 20,181    | 20,406    | 20,764    | 21,071    | 21,349    | 21,702    | 21,977   | 22,157   | 22,484   | 22,729   | 22,993   | 23,422   | 23,729   | 24,041   | 24,354   | 24,642    |
| 13,885    | 14,396    | 14,877    | 15,277    | 15,584    | 15,863    | 16,462    | 16,974    | 17,707    | 18,230    | 18,403    | 18,543   | 18,917   | 19,400   | 19,892   | 20,249   | 20,571   | 20,835   | 21,038   | 21,308   | 21,593    |
| 1,603     | 1,705     | 1,729     | 1,771     | 1,782     | 1,854     | 1,899     | 1,935     | 1,972     | 1,989     | 2,010     | 2,028    | 2,056    | 2,077    | 2,102    | 2,119    | 2,136    | 2,144    | 2,161    | 2,179    | 2,193     |
| 801       | 803       | 813       | 838       | 843       | 850       | 860       | 876       | 891       | 898       | 903       | 910      | 912      | 915      | 921      | 933      | 939      | 947      | 960      | 970      | 980       |

| 6/11/2020 | 6/12/2020 | 6/13/2020 | 6/14/2020 | 6/15/2020 | 6/16/2020 | 6/17/2020 | 6/18/2020 | 6/19/2020 | 6/20/2020 | 6/21/2020 | 6/22/2020 | 6/23/2020 | 6/24/2020 | 6/25/2020 | 6/26/2020 | 6/27/2020 | 6/28/2020 | 6/29/2020 | 6/30/2020 |
|-----------|-----------|-----------|-----------|-----------|-----------|-----------|-----------|-----------|-----------|-----------|-----------|-----------|-----------|-----------|-----------|-----------|-----------|-----------|-----------|
| 610       | 625       | 654       | 661       | 664       | 676       | 696       | 708       | 723       | 743       | 755       | 761       | 778       | 792       | 816       | 836       | 854       | 883       | 904       | 940       |
| 22,845    | 23,710    | 25,368    | 26,287    | 26,713    | 26,912    | 27,327    | 28,214    | 29,017    | 29,549    | 30,021    | 30,477    | 31,234    | 32,086    | 33,232    | 34,220    | 35,105    | 36,350    | 37,203    | 38,064    |
| 10,816    | 11,547    | 12,095    | 12,501    | 12,917    | 13,191    | 13,606    | 13,928    | 14,631    | 15,142    | 15,561    | 16,083    | 16,678    | 17,375    | 18,062    | 18,740    | 19,310    | 19,818    | 20,257    | 20,777    |
| 31,264    | 32,918    | 34,458    | 35,691    | 36,705    | 39,097    | 40,924    | 43,443    | 46,689    | 49,798    | 52,390    | 54,586    | 58,179    | 59,974    | 63,030    | 66,458    | 70,051    | 73,908    | 74,533    | 79,215    |
| 139,281   | 141,983   | 145,643   | 148,855   | 151,452   | 153,560   | 157,015   | 161,099   | 165,416   | 169,309   | 173,824   | 178,054   | 183,073   | 190,222   | 195,571   | 200,461   | 206,433   | 211,243   | 216,550   | 222,917   |
| 28,647    | 28,822    | 29,017    | 29,130    | 29,299    | 29,442    | 29,673    | 29,901    | 30,187    | 30,349    | 30,539    | 30,705    | 30,893    | 31,155    | 31,479    | 31,796    | 32,022    | 32,307    | 32,511    | 32,715    |
| 44,461    | 44,689    | 44,994    | 45,088    | 45,235    | 45,349    | 45,429    | 45,440    | 45,557    | 45,715    | 45,755    | 45,782    | 45,899    | 45,913    | 45,994    | 46,059    | 46,206    | 46,303    | 46,362    | 46,514    |
| 9,589     | 9,654     | 9,709     | 9,767     | 9,799     | 9,818     | 9,847     | 9,903     | 9,952     | 9,984     | 10,020    | 10,058    | 10,094    | 10,128    | 10,159    | 10,185    | 10,216    | 10,248    | 10,292    | 10,327    |
| 10,173    | 10,229    | 10,264    | 10,340    | 10,403    | 10,444    | 10,500    | 10,611    | 10,611    | 10,775    | 10,822    | 10,847    | 10,889    | 10,980    | 11,017    | 11,107    | 11,253    | 11,416    | 11,376    | 11,510    |
| 67,456    | 69,341    | 71,589    | 73,650    | 75,388    | 78,128    | 80,676    | 83,854    | 87,643    | 91,670    | 95,139    | 98,047    | 101,303   | 106,743   | 111,724   | 120,574   | 130,092   | 138,567   | 143,805   | 149,781   |
| 54,973    | 55,783    | 56,801    | 57,681    | 58,414    | 59,078    | 60,030    | 60,912    | 62,009    | 63,809    | 64,701    | 65,928    | 67,675    | 69,381    | 71,095    | 72,995    | 74,985    | 77,210    | 79,417    | 81,291    |
| 654       | 663       | 680       | 688       | 696       | 674       | 678       | 718       | 746       | 760       | 769       | 771       | 775       | 766       | 782       | 796       | 802       | 828       | 829       | 842       |
| 22,973    | 23,348    | 23,717    | 23,926    | 24,077    | 24,179    | 24,461    | 24,854    | 25,275    | 25,496    | 25,957    | 26,051    | 26,372    | 26,705    | 27,257    | 27,685    | 28,012    | 28,489    | 28,782    | 28,947    |
| 3,302     | 3,353     | 3,399     | 3,399     | 3,462     | 3,540     | 3,632     | 3,743     | 3,871     | 4,006     | 4,066     | 4,254     | 4,402     | 4,645     | 4,865     | 5,148     | 5,319     | 5,319     | 5,752     | 6,117     |
| 131,327   | 132,059   | 132,732   | 133,404   | 133,877   | 134,500   | 135,046   | 135,639   | 136,470   | 137,104   | 137,762   | 138,224   | 138,825   | 139,540   | 140,434   | 141,344   | 142,130   | 142,776   | 143,514   | 144,238   |
| 38,748    | 39,146    | 39,543    | 39,909    | 40,430    | 40,786    | 41,013    | 41,438    | 41,746    | 42,061    | 42,423    | 42,633    | 42,871    | 43,140    | 43,655    | 44,140    | 44,575    | 44,930    | 45,228    | 45,594    |
| 10,812    | 11,047    | 11,047    | 11,047    | 11,419    | 11,419    | 11,681    | 11,681    | 12,059    | 12,059    | 12,059    | 12,465    | 12,465    | 12,970    | 12,970    | 13,538    | 13,538    | 13,538    | 14,443    | 14,443    |
| 11,945    | 12,166    | 12,445    | 12,445    | 12,647    | 12,829    | 12,995    | 13,197    | 13,454    | 13,630    | 13,750    | 13,839    | 14,141    | 14,363    | 14,617    | 14,859    | 15,167    | 15,232    | 15,347    | 15,624    |
| 44,472    | 44,995    | 46,283    | 46,619    | 47,172    | 47,706    | 48,634    | 48,634    | 48,515    | 49,385    | 49,778    | 50,239    | 51,595    | 52,477    | 53,415    | 54,769    | 54,769    | 56,236    | 57,081    | 58,095    |
| 104,667   | 105,059   | 105,395   | 105,603   | 105,690   | 105,885   | 106,151   | 106,422   | 106,650   | 106,936   | 107,061   | 107,210   | 107,439   | 107,611   | 107,837   | 108,070   | 108,443   | 108,667   | 108,768   | 108,882   |
| 60,613    | 61,305    | 61,701    | 62,032    | 62,409    | 62,969    | 63,229    | 63,548    | 63,956    | 64,306    | 64,603    | 65,007    | 65,337    | 65,777    | 66,115    | 66,450    | 66,777    | 67,254    | 67,559    | 67,918    |
| 2,667     | 2,721     | 2,757     | 2,810     | 2,819     | 2,819     | 2,836     | 2,878     | 2,938     | 2,938     | 2,957     | 2,971     | 2,994     | 3,071     | 3,070     | 3,102     | 3,191     | 3,221     | 3,252     | 3,294     |
| 65,449    | 65,672    | 65,836    | 66,054    | 66,085    | 66,269    | 66,497    | 66,798    | 67,097    | 67,545    | 67,711    | 67,957    | 68,197    | 68,555    | 68,989    | 69,329    | 69,679    | 69,946    | 70,223    | 70,728    |
| 29,316    | 29,795    | 30,172    | 30,693    | 30,882    | 31,296    | 31,296    | 31,675    | 32,467    | 32,920    | 33,227    | 33,469    | 33,763    | 33,763    | 34,616    | 34,616    | 35,549    | 35,546    | 35,861    | 36,716    |
| 15,390    | 15,585    | 15,810    | 15,810    | 16,189    | 16,414    | 16,625    | 16,908    | 17,201    | 17,590    | 18,005    | 18,143    | 18,577    | 18,868    | 19,421    | 19,914    | 20,261    | 20,575    | 21,043    | 21,551    |
| 18,483    | 19,348    | 19,348    | 19,799    | 20,152    | 20,641    | 20,641    | 20,641    | 20,641    | 20,641    | 22,287    | 22,898    | 23,424    | 24,516    | 25,531    | 25,892    | 26,567    | 27,247    | 27,900    |           |
| 573       | 588       | 588       | 609       | 612       | 630       | 630       | 666       | 698       | 716       | 717       | 734       | 766       | 803       | 829       | 852       | 852       | 919       | 967       | 1,018     |
| 39,481    | 41,249    | 42,676    | 44,119    | 45,102    | 45,853    | 46,855    | 48,188    | 49,840    | 51,389    | 52,801    | 53,605    | 54,453    | 56,174    | 57,183    | 58,818    | 60,537    | 62,142    | 63,484    | 64,670    |
| 2,980     | 3,016     | 3,058     | 3,080     | 3,101     | 3,124     | 3,166     | 3,193     | 3,226     | 3,251     | 3,288     | 3,313     | 3,320     | 3,362     | 3,393     | 3,421     | 3,458     | 3,495     | 3,539     | 3,576     |
| 16,315    | 16,513    | 16,633    | 16,725    | 16,851    | 17,031    | 17,226    | 17,415    | 17,591    | 17,707    | 17,810    | 17,957    | 18,092    | 18,221    | 18,346    | 18,524    | 18,775    | 18,899    | 19,042    | 19,177    |
| 5,209     | 5,251     | 5,299     | 5,318     | 5,345     | 5,364     | 5,436     | 5,450     | 5,518     | 5,544     | 5,558     | 5,571     | 5,598     | 5,638     | 5,638     | 5,671     | 5,747     | 5,760     | 5,782     |           |
| 165,816   | 166,164   | 166,603   | 166,881   | 167,103   | 167,426   | 167,703   | 168,107   | 168,496   | 168,834   | 169,142   | 169,415   | 169,734   | 169,892   | 170,196   | 170,584   | 170,873   | 171,182   | 171,272   | 171,667   |
| 9,367     | 9,526     | 9,621     | 9,723     | 9,845     | 9,933     | 10,065    | 10,153    | 10,260    | 10,430    | 10,565    | 10,694    | 10,838    | 10,990    | 11,192    | 11,408    | 11,619    | 11,809    | 11,982    | 12,147    |
| 10,417    | 10,678    | 10,964    | 11,173    | 11,297    | 11,658    | 11,860    | 12,094    | 12,515    | 13,160    | 13,434    | 13,764    | 14,228    | 14,592    | 15,085    | 15,472    | 16,576    | 17,397    | 18,131    | 18,684    |
| 382,913   | 378,606   | 379,459   | 380,052   | 380,734   | 386,489   | 386,990   | 387,645   | 388,330   | 389,213   | 389,737   | 390,326   | 390,894   | 391,510   | 392,922   | 393,041   | 393,728   | 394,250   | 394,667   | 395,294   |
| 40,004    | 40,424    | 40,848    | 41,148    | 41,576    | 42,010    | 42,422    | 43,122    | 43,731    | 44,262    | 44,808    | 45,537    | 46,127    | 46,759    | 47,651    | 48,638    | 49,455    | 50,309    | 51,046    | 51,789    |
| 7,378     | 7,496     | 7,640     | 8,231     | 8,251     | 8,437     | 8,665     | 8,925     | 9,378     | 9,730     | 10,062    | 10,545    | 10,759    | 10,759    | 11,948    | 11,975    | 12,367    | 12,675    | 12,977    | 13,217    |
| 5,237     | 5,377     | 5,535     | 5,636     | 5,820     | 6,098     | 6,218     | 6,366     | 6,572     | 6,750     | 6,937     | 7,083     | 7,274     | 7,444     | 7,568     | 7,818     | 8,094     | 8,341     | 8,485     | 8,656     |
| 77,999    | 78,462    | 78,462    | 79,121    | 79,483    | 79,818    | 80,236    | 80,762    | 81,266    | 81,730    | 82,186    | 82,186    | 83,191    | 83,770    | 84,370    | 84,991    | 85,496    | 85,988    | 86,606    | 87,242    |
| 15,862    | 15,947    | 15,947    | 15,947    | 16,093    | 16,164    | 16,213    | 16,269    | 16,337    | 16,337    | 16,337    | 16,459    | 16,533    | 16,606    | 16,640    | 16,661    | 16,661    | 16,661    | 16,764    | 16,813    |
| 16,441    | 17,170    | 17,955    | 18,795    | 19,378    | 19,990    | 20,556    | 21,548    | 22,631    | 23,786    | 24,693    | 25,701    | 26,613    | 27,897    | 29,022    | 30,335    | 31,939    | 33,320    | 34,644    | 36,399    |
| 5,665     | 5,742     | 5,833     | 5,898     | 5,928     | 5,966     | 6,050     | 6,109     | 6,158     | 6,225     | 6,297     | 6,326     | 6,353     | 6,419     | 6,479     | 6,535     | 6,626     | 6,681     | 6,716     | 6,764     |
| 28,538    | 29,126    | 29,541    | 30,432    | 31,160    | 31,830    | 32,143    | 32,829    | 34,017    | 34,446    | 35,102    | 35,553    | 36,303    | 37,235    | 38,034    | 39,444    | 40,172    | 40,172    | 42,297    | 43,509    |
| 81,583    | 83,680    | 86,011    | 87,854    | 89,108    | 93,206    | 96,335    | 99,851    | 103,305   | 107,735   | 111,601   | 114,881   | 120,370   | 125,921   | 131,917   | 137,624   | 143,371   | 148,723   | 153,011   | 159,986   |
| 13,429    | 13,789    | 14,184    | 14,469    | 14,826    | 15,141    | 15,539    | 16,199    | 16,826    | 17,400    | 17,825    | 18,135    | 18,660    | 19,185    | 19,816    | 20,481    | 20,986    | 21,450    | 22,263    | 22,746    |
| 53,211    | 53,869    | 54,506    | 54,886    | 55,331    | 55,775    | 56,238    | 56,793    | 57,443    | 57,994    | 58,465    | 58,994    | 59,514    | 59,946    | 60,570    | 61,247    | 61,736    | 62,189    | 62,787    | 62,787    |
| 1,109     | 1,119     | 1,125     | 1,127     | 1,128     | 1,130     | 1,129     | 1,135     | 1,144     | 1,147     | 1,159     | 1,163     | 1,164     | 1,184     | 1,191     | 1,198     | 1,200     | 1,202     | 1,208     | 1,208     |
| 24,779    | 25,171    | 25,538    | 25,834    | 26,158    | 26,531    | 26,784    | 27,192    | 27,601    | 28,225    | 28,680    | 28,870    | 29,386    | 29,869    | 30,367    | 30,855    | 31,404    | 31,752    | 32,253    | 32,824    |
| 21,926    | 24,722    | 25,031    | 25,295    | 25,480    | 25,789    | 26,079    | 26,542    | 26,852    | 27,294    | 27,587    | 27,838    | 28,127    | 28,593    | 29,105    | 29,668    | 30,227    | 30,707    | 31,033    | 31,662    |
| 2,217     | 2,249     | 2,274     | 2,290     | 2,322     | 2,341     | 2,376     | 2,418     | 2,468     | 2,500     | 2,543     | 2,571     | 2,593     | 2,629     | 2,694     | 2,730     | 2,782     | 2,832     | 2,870     | 2,905     |
| 1,009     | 1,027     | 1,050     | 1,060     | 1,079     | 1,089     | 1,114     | 1,144     | 1,173     | 1,179     | 1,197     | 1,230     | 1,254     | 1,282     | 1,326     | 1,368     | 1,392     | 1,417     | 1,450     | 1,487     |

| 7/1/2020 | 7/2/2020 | 7/3/2020 | 7/4/2020 | 7/5/2020 | 7/6/2020 | 7/7/2020 | 7/8/2020 | 7/9/2020 | 7/10/2020 | 7/11/2020 | 7/12/2020 | 7/13/2020 | 7/14/2020 | 7/15/2020 | 7/16/2020 | 7/17/2020 | 7/18/2020 | 7/19/2020 | 7/20/2020 | 7/21/2020 |
|----------|----------|----------|----------|----------|----------|----------|----------|----------|-----------|-----------|-----------|-----------|-----------|-----------|-----------|-----------|-----------|-----------|-----------|-----------|
| 978      | 1,017    | 1,063    | 1,111    | 1,138    | 1,166    | 1,184    | 1,226    | 1,272    | 1,323     | 1,385     | 1,479     | 1,539     | 1,579     | 1,631     | 1,693     | 1,733     | 1,795     | 1,874     | 1,949     | 2,041     |
| 38,981   | 40,111   | 41,865   | 42,862   | 44,909   | 44,909   | 45,821   | 46,991   | 49,205   | 50,546    | 51,947    | 53,587    | 55,590    | 57,308    | 59,113    | 61,143    | 63,153    | 65,234    | 67,011    | 68,950    | 70,426    |
| 21,197   | 22,075   | 22,622   | 23,209   | 23,814   | 24,253   | 24,512   | 25,246   | 26,052   | 26,803    | 27,864    | 28,367    | 28,939    | 29,733    | 30,297    | 31,114    | 31,762    | 32,533    | 33,228    | 33,927    | 34,665    |
| 84,092   | 87,425   | 91,858   | 94,553   | 98,089   | 101,441  | 105,094  | 108,614  | 112,671  | 116,892   | 119,930   | 122,467   | 123,824   | 128,097   | 131,354   | 134,613   | 138,523   | 141,265   | 143,624   | 145,183   | 148,683   |
| 232,657  | 240,195  | 248,235  | 254,745  | 260,155  | 271,684  | 277,774  | 289,468  | 296,499  | 304,297   | 312,344   | 320,804   | 329,162   | 336,508   | 347,634   | 356,178   | 366,164   | 375,363   | 384,692   | 391,538   | 400,769   |
| 33,029   | 33,352   | 33,612   | 33,866   | 34,065   | 34,257   | 34,664   | 35,116   | 35,525   | 36,191    | 36,591    | 36,913    | 37,242    | 37,686    | 38,155    | 38,726    | 39,344    | 39,788    | 40,142    | 40,566    | 41,059    |
| 46,572   | 46,646   | 46,717   | 46,717   | 46,717   | 46,976   | 47,033   | 47,108   | 47,209   | 47,287    | 47,287    | 47,287    | 47,510    | 47,530    | 47,636    | 47,750    | 47,893    | 47,893    | 47,893    | 48,055    | 48,096    |
| 10,365   | 10,390   | 10,435   | 10,447   | 10,482   | 10,515   | 10,569   | 10,642   | 10,679   | 10,743    | 10,801    | 10,847    | 10,906    | 10,946    | 11,026    | 11,076    | 11,115    | 11,194    | 11,261    | 11,339    | 11,427    |
| 11,739   | 11,731   | 11,923   | 12,128   | 12,348   | 12,469   | 12,525   | 12,610   | 12,751   | 12,857    | 12,978    | 12,879    | 12,969    | 13,050    | 13,114    | 13,337    | 13,429    | 13,429    | 13,519    | 13,746    | 13,792    |
| 156,288  | 166,303  | 175,718  | 187,090  | 197,076  | 203,376  | 210,594  | 220,476  | 229,367  | 240,710   | 250,984   | 266,119   | 278,667   | 287,789   | 297,876   | 311,640   | 323,002   | 333,201   | 345,612   | 355,899   | 365,244   |
| 84,237   | 87,709   | 90,493   | 93,319   | 95,516   | 97,064   | 100,470  | 103,890  | 106,727  | 111,211   | 114,401   | 116,926   | 120,569   | 123,963   | 127,834   | 131,275   | 135,183   | 139,872   | 143,123   | 145,575   | 148,988   |
| 851      | 870      | 894      | 915      | 939      | 946      | 980      | 1,001    | 1,036    | 1,058     | 1,097     | 1,115     | 1,138     | 1,158     | 1,190     | 1,209     | 1,232     | 1,245     | 1,273     | 1,287     | 1,310     |
| 29,458   | 30,209   | 30,430   | 31,061   | 31,353   | 31,657   | 32,029   | 32,509   | 33,243   | 33,896    | 34,647    | 35,171    | 35,529    | 35,850    | 36,294    | 37,132    | 37,722    | 38,041    | 38,723    | 39,224    | 39,473    |
| 6,370    | 6,593    | 6,994    | 7,370    | 7,733    | 8,052    | 8,539    | 8,969    | 9,428    | 9,928     | 10,505    | 10,902    | 11,402    | 11,718    | 12,445    | 13,133    | 13,752    | 14,302    | 14,873    | 15,266    | 15,822    |
| 145,066  | 145,066  | 146,872  | 147,734  | 148,373  | 148,987  | 149,574  | 150,554  | 151,572  | 152,899   | 154,094   | 155,048   | 155,931   | 156,638   | 157,825   | 159,082   | 160,509   | 161,785   | 162,750   | 163,923   | 164,878   |
| 45,952   | 46,387   | 46,915   | 47,432   | 48,008   | 48,331   | 48,626   | 49,063   | 49,575   | 50,300    | 51,079    | 51,612    | 52,037    | 52,685    | 53,370    | 54,080    | 54,813    | 55,654    | 56,571    | 57,206    | 57,916    |
| 14,990   | 14,990   | 15,919   | 15,919   | 15,919   | 16,901   | 16,901   | 17,618   | 17,618   | 18,611    | 18,611    | 18,611    | 20,058    | 20,058    | 20,933    | 20,933    | 21,965    | 21,965    | 21,965    | 23,334    | 23,334    |
| 15,842   | 16,079   | 16,376   | 16,376   | 16,376   | 17,152   | 17,519   | 17,919   | 18,245   | 18,670    | 19,121    | 19,389    | 19,653    | 20,223    | 20,677    | 21,083    | 21,605    | 22,184    | 23,161    | 23,414    | 24,060    |
| 60,178   | 61,561   | 63,289   | 63,289   | 65,226   | 66,327   | 68,263   | 70,151   | 71,994   | 74,636    | 76,803    | 78,122    | 79,827    | 82,042    | 84,131    | 86,411    | 88,590    | 88,590    | 91,706    | 94,892    | 96,583    |
| 109,143  | 109,338  | 109,628  | 109,838  | 109,974  | 110,137  | 110,338  | 110,602  | 110,897  | 111,110   | 111,398   | 111,597   | 111,827   | 112,130   | 112,347   | 112,581   | 112,879   | 113,238   | 113,534   | 113,789   | 114,033   |
| 68,423   | 68,961   | 69,341   | 69,632   | 69,904   | 70,396   | 70,861   | 71,447   | 71,910   | 72,467    | 73,109    | 73,527    | 74,260    | 75,016    | 75,664    | 76,371    | 77,206    | 78,131    | 78,685    | 79,545    | 80,172    |
| 3,328    | 3,328    | 3,397    | 3,397    | 3,423    | 3,440    | 3,460    | 3,486    | 3,499    | 3,499     | 3,539     | 3,558     | 3,566     | 3,578     | 3,598     | 3,636     | 3,644     | 3,646     | 3,711     | 3,711     | 3,722     |
| 71,089   | 71,678   | 71,678   | 72,581   | 72,941   | 73,269   | 73,900   | 74,551   | 75,063   | 75,685    | 76,370    | 76,776    | 77,198    | 77,864    | 78,913    | 79,839    | 81,338    | 81,868    | 82,395    | 83,059    |           |
| 37,210   | 37,624   | 37,624   | 38,136   | 38,569   | 39,133   | 39,133   | 40,136   | 40,767   | 41,571    | 41,571    | 42,772    | 43,170    | 43,170    | 44,347    | 45,013    | 45,470    | 46,204    | 46,204    | 47,457    | 47,961    |
| 21,927   | 22,283   | 22,830   | 23,215   | 23,436   | 23,856   | 24,629   | 25,204   | 25,999   | 26,661    | 27,133    | 27,443    | 27,890    | 28,826    | 29,714    | 30,422    | 31,290    | 32,248    | 33,094    | 33,624    | 34,762    |
| 28,770   | 28,770   | 30,674   | 30,900   | 31,257   | 31,257   | 32,214   | 33,591   | 34,622   | 34,622    | 36,287    | 36,680    | 37,542    | 37,542    | 39,798    | 40,828    | 40,829    | 42,639    | 43,889    | 45,524    | 47,071    |
| 1,083    | 1,123    | 1,128    | 1,167    | 1,249    | 1,249    | 1,371    | 1,466    | 1,569    | 1,593     | 1,677     | 1,841     | 1,843     | 1,952     | 2,218     | 2,342     | 2,366     | 2,471     | 2,533     | 2,621     | 2,712     |
| 66,514   | 64,670   | 70,241   | 70,241   | 72,983   | 74,529   | 75,875   | 77,310   | 79,349   | 81,331    | 83,793    | 85,701    | 87,528    | 89,484    | 91,266    | 93,426    | 95,477    | 97,958    | 99,778    | 101,046   | 102,861   |
| 3,615    | 3,657    | 3,722    | 3,779    | 3,816    | 3,849    | 3,898    | 3,971    | 4,070    | 4,154     | 4,243     | 4,334     | 4,442     | 4,565     | 4,668     | 4,792     | 4,907     | 5,019     | 5,126     | 5,207     | 5,367     |
| 19,310   | 19,452   | 19,660   | 19,827   | 19,929   | 20,046   | 20,201   | 20,425   | 20,623   | 20,777    | 20,998    | 21,172    | 21,399    | 21,717    | 21,979    | 22,134    | 22,361    | 22,481    | 22,583    | 22,847    | 23,190    |
| 5,802    | 5,822    | 5,822    | 5,857    | 5,897    | 5,914    | 5,932    | 5,952    | 5,973    | 5,991     | 6,024     | 6,054     | 6,068     | 6,091     | 6,113     | 6,139     | 6,165     | 6,188     | 6,203     | 6,249     | 6,262     |
| 171,928  | 172,356  | 172,742  | 173,033  | 173,402  | 173,611  | 173,878  | 174,039  | 174,270  | 174,628   | 174,959   | 175,298   | 175,522   | 175,915   | 176,278   | 176,501   | 176,551   | 176,814   | 176,783   | 176,963   | 177,256   |
| 12,276   | 12,520   | 12,776   | 13,063   | 13,256   | 13,507   | 13,727   | 14,017   | 14,251   | 14,549    | 14,773    | 15,028    | 15,291    | 15,514    | 15,841    | 16,138    | 16,456    | 16,736    | 16,971    | 17,215    | 17,517    |
| 19,328   | 19,964   | 20,946   | 21,803   | 22,646   | 23,137   | 24,020   | 24,587   | 25,139   | 26,144    | 26,862    | 27,894    | 28,744    | 29,832    | 30,673    | 32,120    | 33,503    | 34,689    | 35,977    | 36,925    | 37,741    |
| 395982   | 396869   | 397675   | 398327   | 398828   | 399411   | 399925   | 400719   | 401345   | 402110    | 402861    | 403474    | 404051    | 405017    | 405876    | 406594    | 407334    | 407972    | 408495    | 408730    | 409845    |
| 52,865   | 54,166   | 55,257   | 56,183   | 57,151   | 57,956   | 58,904   | 60,181   | 61,331   | 62,856    | 64,214    | 65,592    | 66,853    | 67,995    | 69,311    | 70,601    | 72,280    | 73,822    | 74,932    | 76,168    | 77,215    |
| 13,853   | 14,217   | 14,217   | 15,645   | 15,776   | 16,063   | 16,501   | 17,357   | 18,036   | 18,680    | 19,779    | 19,934    | 20,401    | 20,922    | 21,832    | 22,907    | 23,535    | 25,056    | 25,265    | 25,581    | 26,326    |
| 8,931    | 9,294    | 9,636    | 9,930    | 10,230   | 10,395   | 10,605   | 10,819   | 11,188   | 11,454    | 11,851    | 12,170    | 12,438    | 12,805    | 13,081    | 13,509    | 13,802    | 14,149    | 14,579    | 14,847    | 15,139    |
| 88,074   | 88,741   | 89,375   | 89,854   | 90,304   | 91,299   | 92,148   | 92,867   | 93,876   | 94,689    | 95,266    | 95,742    | 96,671    | 97,665    | 98,446    | 99,478    | 100,241   | 101,027   | 101,738   | 102,765   | 103,396   |
| 16,853   | 16,941   | 16,991   | 16,991   | 16,991   | 16,991   | 17,154   | 17,204   | 17,243   | 17,312    | 17,312    | 17,312    | 17,487    | 17,487    | 17,640    | 17,793    | 17,793    | 17,793    | 17,994    | 17,994    | 17,996    |
| 37,919   | 39,701   | 41,532   | 43,386   | 44,847   | 46,380   | 47,352   | 48,909   | 50,691   | 52,419    | 54,699    | 56,648    | 58,168    | 60,389    | 62,245    | 64,083    | 66,060    | 67,612    | 69,986    | 71,445    | 73,337    |
| 6,826    | 6,893    | 6,978    | 7,028    | 7,063    | 7,105    | 7,163    | 7,242    | 7,336    | 7,401     | 7,454     | 7,499     | 7,524     | 7,572     | 7,652     | 7,694     | 7,789     | 7,862     | 7,906     | 7,943     | 8,019     |
| 45,315   | 46,890   | 48,712   | 50,140   | 51,431   | 52,155   | 53,514   | 55,986   | 57,591   | 59,546    | 61,006    | 61,960    | 65,274    | 66,788    | 69,061    | 71,540    | 73,819    | 76,336    | 78,115    | 79,754    | 81,944    |
| 168,062  | 175,977  | 183,532  | 191,790  | 195,239  | 200,557  | 210,585  | 220,554  | 230,346  | 240,111   | 250,462   | 258,658   | 264,313   | 275,058   | 282,365   | 292,656   | 307,572   | 317,730   | 325,030   | 332,434   | 341,739   |
| 23,386   | 23,921   | 24,571   | 25,002   | 25,500   | 26,004   | 26,706   | 27,480   | 28,054   | 28,963    | 29,605    | 30,177    | 30,722    | 31,196    | 31,664    | 32,587    | 33,392    | 34,045    | 34,682    | 35,084    | 35,648    |
| 63,203   | 63,735   | 64,393   | 65,748   | 66,102   | 66,740   | 67,375   | 67,988   | 68,931   | 69,782    | 70,670    | 71,642    | 72,443    | 73,527    | 74,431    | 75,433    | 76,373    | 77,430    | 78,375    | 79,371    | 80,393    |
| 1,210    | 1,227    | 1,238    | 1,238    | 1,251    | 1,251    | 1,254    | 1,256    | 1,272    | 1,283     | 1,283     | 1,296     | 1,301     | 1,305     | 1,318     | 1,325     | 1,334     | 1,338     | 1,350     | 1,360     | 1,366     |
| 33,435   | 34,151   | 34,778   | 35,247   | 35,898   | 36,985   | 37,420   | 37,941   | 38,581   | 39,218    | 39,218    | 40,656    | 41,757    | 42,304    | 43,046    | 44,313    | 45,067    | 46,026    | 46,946    | 47,743    | 48,575    |
| 32,225   | 32,809   | 33,431   | 34,207   | 34,740   | 35,230   | 35,765   | 36,410   | 37,210   | 38,099    | 39,080    | 39,877    | 40,382    | 41,349    | 42,197    | 43,139    | 44,068    | 45,099    | 45,948    | 46,675    | 47,836    |
| 2,979    | 3,053    | 3,126    | 3,205    | 3,335    | 3,442    | 3,505    | 3,707    | 3,826    | 3,983     | 4,146     | 4,244     | 4,313     | 4,407     | 4,557     | 4,657     | 4,783     | 4,922     | 5,042     | 5,142     | 5,199     |
| 1,514    | 1,550    | 1,582    | 1,606    | 1,634    | 1,675    | 1,711    | 1,740    | 1,774    | 1,790     | 1,839     | 1,862     | 1,903     | 1,951     | 1,985     | 2,026     | 2,069     | 2,108     | 2,126     | 2,187     | 2,238     |

| 7/22/2020 | 7/23/2020 | 7/24/2020 | 7/25/2020 | 7/26/2020 | 7/27/2020 | 7/28/2020 | 7/29/2020 | 7/30/2020 | 7/31/2020 | 8/1/2020 | 8/2/2020 | 8/3/2020 | 8/4/2020 | 8/5/2020 | 8/6/2020 | 8/7/2020 | 8/8/2020 | 8/9/2020 | 8/10/2020 | 8/11/2020 |
|-----------|-----------|-----------|-----------|-----------|-----------|-----------|-----------|-----------|-----------|----------|----------|----------|----------|----------|----------|----------|----------|----------|-----------|-----------|
| 2,132     | 2,192     | 2,249     | 2,338     | 2,524     | 2,622     | 2,729     | 2,797     | 2,878     | 2,990     | 3,136    | 3,280    | 3,341    | 3,394    | 3,449    | 3,484    | 3,536    | 3,613    | 3,711    | 3,775     | 3,821     |
| 71,886    | 74,344    | 76,136    | 78,130    | 79,294    | 81,270    | 82,530    | 83,782    | 85,906    | 87,867    | 89,349   | 91,444   | 92,661   | 93,847   | 94,819   | 96,592   | 98,484   | 100,353  | 101,334  | 103,020   | 103,851   |
| 35,246    | 36,259    | 37,249    | 37,981    | 38,623    | 39,447    | 40,181    | 40,968    | 41,759    | 42,511    | 43,173   | 43,810   | 44,597   | 45,381   | 46,293   | 47,028   | 48,039   | 48,811   | 49,383   | 50,028    | 50,411    |
| 150,609   | 152,944   | 156,301   | 160,041   | 162,014   | 163,827   | 165,934   | 168,273   | 170,798   | 174,010   | 177,022  | 178,467  | 179,497  | 180,505  | 182,203  | 183,647  | 185,053  | 186,107  | 186,923  | 187,523   | 188,737   |
| 413,576   | 425,616   | 435,334   | 445,400   | 453,659   | 460,550   | 466,550   | 475,305   | 485,502   | 493,588   | 500,130  | 509,162  | 514,901  | 519,427  | 524,722  | 529,980  | 538,416  | 545,787  | 554,160  | 561,911   | 574,411   |
| 41,698    | 42,314    | 42,980    | 43,789    | 44,336    | 44,565    | 45,314    | 45,796    | 46,204    | 46,809    | 47,267   | 47,716   | 47,968   | 48,394   | 48,988   | 49,436   | 49,893   | 50,324   | 50,660   | 51,039    | 51,441    |
| 48,223    | 48,232    | 48,776    | 48,776    | 48,776    | 48,983    | 49,077    | 49,540    | 49,670    | 49,810    | 49,810   | 49,810   | 50,062   | 50,110   | 50,225   | 50,245   | 50,320   | 50,320   | 50,320   | 50,567    | 50,684    |
| 11,529    | 11,571    | 11,649    | 11,717    | 11,780    | 11,858    | 11,945    | 11,999    | 12,057    | 12,126    | 12,205   | 12,274   | 12,313   | 12,398   | 12,443   | 12,518   | 12,589   | 12,653   | 12,753   | 12,807    | 12,896    |
| 13,924    | 13,924    | 14,202    | 14,175    | 14,406    | 14,476    | 14,602    | 14,689    | 14,689    | 14,877    | 14,877   | 14,949   | 15,055   | 15,296   | 15,365   | 15,365   | 15,502   | 15,575   | 15,634   | 15,634    | 15,699    |
| 374,920   | 385,091   | 397,470   | 409,585   | 418,844   | 427,698   | 436,867   | 446,251   | 456,105   | 465,030   | 474,621  | 481,668  | 486,426  | 491,773  | 497,181  | 504,768  | 512,421  | 520,846  | 527,036  | 531,188   | 536,981   |
| 152,302   | 156,588   | 161,401   | 165,188   | 167,953   | 170,843   | 175,052   | 178,323   | 182,286   | 186,352   | 190,012  | 193,177  | 195,435  | 197,948  | 201,713  | 204,895  | 209,004  | 213,427  | 216,596  | 219,025   | 222,588   |
| 1,339     | 1,389     | 1,449     | 1,516     | 1,576     | 1,603     | 1,647     | 1,750     | 1,871     | 1,989     | 2,067    | 2,110    | 2,311    | 2,442    | 2,603    | 2,741    | 2,919    | 3,138    | 3,270    | 3,408     | 3,523     |
| 40,000    | 40,635    | 41,271    | 41,671    | 42,199    | 42,554    | 42,782    | 43,280    | 44,039    | 44,582    | 44,981   | 45,492   | 45,845   | 46,045   | 46,659   | 47,362   | 47,865   | 48,286   | 48,789   | 49,074    | 49,329    |
| 16,322    | 16,736    | 17,264    | 17,827    | 18,177    | 18,694    | 19,222    | 19,679    | 20,246    | 20,721    | 21,114   | 21,344   | 21,675   | 22,234   | 22,707   | 23,399   | 23,922   | 24,495   | 24,671   | 25,100    | 25,595    |
| 166,476   | 168,100   | 169,699   | 171,125   | 172,666   | 173,897   | 174,973   | 176,366   | 178,138   | 180,118   | 181,757  | 183,224  | 184,522  | 185,993  | 187,752  | 189,705  | 191,808  | 193,998  | 195,380  | 196,699   | 198,248   |
| 58,673    | 59,602    | 60,598    | 61,520    | 62,372    | 62,907    | 63,678    | 64,299    | 65,253    | 66,154    | 67,122   | 67,857   | 68,433   | 69,255   | 69,975   | 71,015   | 72,254   | 73,287   | 74,328   | 74,992    | 75,862    |
| 24,104    | 24,104    | 25,109    | 25,109    | 25,109    | 26,172    | 26,172    | 26,870    | 26,870    | 27,812    | 27,812   | 27,812   | 28,876   | 28,876   | 29,717   | 29,717   | 30,638   | 30,638   | 30,638   | 31,730    | 31,730    |
| 24,540    | 25,147    | 25,931    | 26,764    | 27,079    | 27,601    | 28,126    | 28,727    | 29,386    | 30,151    | 30,723   | 31,185   | 31,508   | 32,197   | 32,741   | 33,254   | 33,796   | 34,758   | 34,982   | 35,254    | 35,793    |
| 99,354    | 101,650   | 103,734   | 105,734   | 107,574   | 109,917   | 111,038   | 112,773   | 114,481   | 116,280   | 119,747  | 120,846  | 124,461  | 125,943  | 127,246  | 128,746  | 131,399  | 131,399  | 131,399  | 131,961   | 133,125   |
| 114,320   | 114,647   | 114,985   | 115,274   | 115,637   | 115,926   | 116,182   | 116,684   | 117,098   | 117,612   | 118,040  | 118,458  | 118,657  | 119,203  | 119,643  | 119,874  | 120,291  | 120,711  | 121,040  | 121,315   | 121,707   |
| 80,836    | 81,766    | 83,054    | 83,748    | 84,876    | 85,524    | 86,285    | 87,177    | 88,346    | 89,365    | 90,274   | 91,144   | 91,854   | 92,426   | 93,005   | 93,806   | 94,581   | 95,503   | 96,258   | 96,843    | 97,384    |
| 3,737     | 3,758     | 3,757     | 3,814     | 3,832     | 3,838     | 3,866     | 3,888     | 3,910     | 3,937     | 3,958    | 3,970    | 3,975    | 3,992    | 3,997    | 4,015    | 4,026    | 4,042    | 4,051    | 4,050     | 4,069     |
| 83,730    | 84,431    | 85,072    | 85,622    | 86,661    | 87,173    | 87,958    | 88,974    | 89,781    | 90,574    | 91,332   | 91,761   | 92,374   | 93,175   | 93,893   | 94,656   | 95,470   | 96,191   | 96,726   | 97,306    | 98,213    |
| 48,721    | 49,490    | 50,291    | 50,291    | 51,803    | 52,281    | 52,947    | 53,692    | 54,464    | 55,188    | 55,947   | 55,947   | 57,162   | 57,779   | 58,640   | 59,185   | 60,101   | 60,898   | 61,516   | 61,839    | 61,839    |
| 36,063    | 37,700    | 39,352    | 40,709    | 41,927    | 43,050    | 44,823    | 46,750    | 48,834    | 50,323    | 51,258   | 51,840   | 52,887   | 54,080   | 55,321   | 56,383   | 57,379   | 57,379   | 58,927   | 59,954    | 60,935    |
| 48,053    | 49,663    | 51,097    | 52,304    | 52,304    | 52,957    | 55,804    | 57,579    | 57,579    | 59,881    | 59,881   | 61,125   | 62,199   | 62,199   | 63,444   | 64,400   | 66,646   | 66,646   | 67,173   | 67,649    | 68,293    |
| 2,909     | 3,037     | 3,247     | 3,342     | 3,381     | 3,381     | 3,667     | 3,780     | 3,954     | 3,965     | 4,081    | 4,193    | 4,314    | 4,429    | 4,593    | 4,744    | 4,888    | 4,952    | 5,017    | 5,017     | 5,289     |
| 105,001   | 106,893   | 108,995   | 111,092   | 112,713   | 114,338   | 116,087   | 117,850   | 120,194   | 122,148   | 123,878  | 125,219  | 126,532  | 128,161  | 129,288  | 131,267  | 132,812  | 134,766  | 136,218  | 136,844   | 137,895   |
| 5,493     | 5,614     | 5,736     | 5,876     | 5,986     | 6,141     | 6,227     | 6,301     | 6,469     | 6,602     | 6,660    | 6,785    | 6,933    | 7,057    | 7,177    | 7,327    | 7,508    | 7,596    | 7,713    | 7,885     | 7,970     |
| 23,486    | 23,818    | 24,174    | 24,395    | 24,618    | 24,889    | 25,157    | 25,422    | 25,766    | 26,211    | 26,391   | 26,702   | 26,956   | 27,178   | 27,489   | 27,821   | 28,104   | 28,245   | 28,432   | 28,696    | 29,030    |
| 6,295     | 6,318     | 6,375     | 6,415     | 6,436     | 6,441     | 6,500     | 6,513     | 6,544     | 6,583     | 6,613    | 6,634    | 6,660    | 6,693    | 6,719    | 6,742    | 6,779    | 6,818    | 6,831    | 6,840     | 6,861     |
| 177,645   | 177,887   | 178,345   | 178,858   | 179,363   | 179,812   | 180,295   | 180,766   | 180,970   | 181,660   | 182,029  | 182,350  | 182,614  | 182,970  | 183,327  | 183,701  | 184,061  | 184,429  | 184,773  | 185,031   | 185,475   |
| 17,828    | 18,163    | 18,475    | 18,788    | 19,042    | 19,502    | 19,791    | 20,136    | 20,388    | 20,600    | 20,796   | 21,016   | 21,130   | 21,340   | 21,566   | 21,773   | 21,965   | 22,115   | 22,315   | 22,444    | 22,643    |
| 38,877    | 40,140    | 40,140    | 42,037    | 43,067    | 44,055    | 45,151    | 46,021    | 47,170    | 48,312    | 49,306   | 50,437   | 51,422   | 52,423   | 53,068   | 53,919   | 54,757   | 55,644   | 56,456   | 57,198    | 57,745    |
| 410560    | 411140    | 412062    | 412562    | 413091    | 413834    | 414479    | 415209    | 415960    | 416633    | 417273   | 417730   | 418352   | 419131   | 419752   | 420523   | 421137   | 421834   | 422349   | 422824    | 423587    |
| 78,742    | 80,186    | 81,746    | 83,184    | 84,073    | 85,177    | 86,497    | 87,893    | 89,626    | 91,159    | 92,087   | 93,031   | 93,963   | 95,106   | 96,305   | 97,471   | 98,675   | 99,969   | 100,848  | 101,731   | 102,826   |
| 27,541    | 28,221    | 29,348    | 30,360    | 33,582    | 34,981    | 34,990    | 37,060    | 38,291    | 39,105    | 40,418   | 40,910   | 41,199   | 41,423   | 43,414   | 44,325   | 45,272   | 46,159   | 46,652   | 47,067    | 47,908    |
| 15,394    | 15,713    | 16,104    | 16,492    | 16,758    | 17,088    | 17,416    | 17,721    | 18,131    | 18,493    | 18,817   | 19,097   | 19,366   | 19,699   | 19,978   | 20,225   | 20,636   | 21,010   | 21,272   | 21,488    | 21,774    |
| 104,358   | 105,571   | 106,625   | 107,425   | 108,264   | 109,384   | 110,218   | 111,078   | 112,048   | 112,936   | 112,936  | 113,590  | 114,155  | 115,009  | 115,714  | 116,521  | 117,279  | 118,092  | 118,852  | 119,453   | 120,281   |
| 18,062    | 18,148    | 18,224    | 18,224    | 18,224    | 18,515    | 18,725    | 18,800    | 18,950    | 19,022    | 19,022   | 19,246   | 19,246   | 19,390   | 19,481   | 19,611   | 19,738   | 19,738   | 19,738   | 19,934    | 20,053    |
| 75,042    | 76,606    | 78,607    | 80,008    | 81,199    | 82,417    | 84,109    | 85,846    | 87,572    | 89,016    | 90,599   | 91,788   | 92,951   | 94,190   | 95,472   | 96,797   | 98,219   | 99,460   | 100,435  | 101,159   | 102,130   |
| 8,077     | 8,143     | 8,200     | 8,305     | 8,395     | 8,444     | 8,492     | 8,641     | 8,685     | 8,764     | 8,867    | 8,955    | 9,020    | 9,079    | 9,168    | 9,273    | 9,371    | 9,477    | 9,605    | 9,663     | 9,713     |
| 84,417    | 86,987    | 89,078    | 90,796    | 93,936    | 96,489    | 99,044    | 100,822   | 102,871   | 105,959   | 108,184  | 109,627  | 110,636  | 112,441  | 114,098  | 116,350  | 118,782  | 120,585  | 122,712  | 123,914   | 124,915   |
| 351,618   | 361,125   | 369,826   | 375,846   | 381,656   | 385,923   | 394,265   | 403,307   | 412,107   | 420,946   | 430,485  | 430,485  | 442,014  | 451,181  | 459,887  | 467,485  | 474,524  | 481,483  | 486,362  | 490,817   | 500,620   |
| 36,254    | 36,889    | 37,681    | 38,064    | 38,502    | 38,915    | 39,337    | 39,942    | 40,258    | 40,797    | 41,380   | 41,759   | 42,153   | 42,544   | 43,096   | 43,606   | 44,067   | 44,090   | 44,714   | 45,006    | 45,399    |
| 81,237    | 82,364    | 83,609    | 84,567    | 86,072    | 86,994    | 87,993    | 88,904    | 89,888    | 90,801    | 91,782   | 93,106   | 94,251   | 95,049   | 95,867   | 97,882   | 99,189   | 100,086  | 100,750  | 101,746   | 102,521   |
| 1,366     | 1,377     | 1,385     | 1,396     | 1,400     | 1,402     | 1,405     | 1,406     | 1,407     | 1,414     | 1,421    | 1,426    | 1,426    | 1,431    | 1,436    | 1,445    | 1,448    | 1,459    | 1,462    | 1,462     | 1,478     |
| 49,247    | 50,009    | 50,824    | 51,849    | 52,635    | 53,321    | 54,205    | 54,995    | 55,803    | 55,803    | 57,541   | 58,172   | 58,715   | 59,379   | 60,084   | 60,917   | 61,587   | 62,523   | 63,072   | 63,647    | 64,151    |
| 48,583    | 49,669    | 50,727    | 51,715    | 52,680    | 53,281    | 54,064    | 54,988    | 56,079    | 56,934    | 58,058   | 58,990   | 59,401   | 60,171   | 61,110   | 61,985   | 63,028   | 64,213   | 64,835   | 65,356    | 66,123    |
| 5,461     | 5,550     | 5,695     | 5,821     | 5,960     | 6,054     | 6,173     | 6,326     | 6,422     | 6,642     | 6,735    | 6,854    | 6,973    | 7,051    | 7,159    | 7,277    | 7,433    | 7,563    | 7,694    | 7,754     | 7,875     |
| 2,288     | 2,347     | 2,405     | 2,446     | 2,475     | 2,520     | 2,589     | 2,628     | 2,686     | 2,726     | 2,769    | 2,808    | 2,848    | 2,884    | 2,923    | 2,       |          |          |          |           |           |

| 8/12/2020 | 8/13/2020 | 8/14/2020 | 8/15/2020 | 8/16/2020 | 8/17/2020 | 8/18/2020 | 8/19/2020 | 8/20/2020 | 8/21/2020 | 8/22/2020 | 8/23/2020 |
|-----------|-----------|-----------|-----------|-----------|-----------|-----------|-----------|-----------|-----------|-----------|-----------|
| 3,881     | 3,963     | 4,073     | 4,156     | 4,259     | 4,309     | 4,371     | 4,438     | 4,520     | 4,588     | 4,677     | 4,741     |
| 104,786   | 105,557   | 106,309   | 107,580   | 108,433   | 109,004   | 110,361   | 111,478   | 112,449   | 113,632   | 114,532   | 115,992   |
| 51,114    | 51,766    | 52,392    | 51,992    | 52,665    | 53,077    | 53,487    | 54,216    | 54,765    | 55,652    | 56,199    | 56,574    |
| 189,443   | 190,794   | 191,721   | 192,654   | 193,537   | 194,005   | 194,920   | 195,557   | 196,280   | 196,899   | 197,895   | 198,103   |
| 586,056   | 593,141   | 601,075   | 613,689   | 621,562   | 628,031   | 632,667   | 638,831   | 644,751   | 650,336   | 656,892   | 663,669   |
| 51,756    | 52,129    | 52,538    | 52,838    | 53,176    | 53,370    | 53,631    | 53,901    | 54,230    | 54,586    | 54,883    | 55,133    |
| 50,706    | 50,782    | 50,897    | 50,897    | 50,897    | 51,267    | 51,255    | 51,314    | 51,432    | 51,519    | 51,519    | 51,519    |
| 12,959    | 13,024    | 13,118    | 13,159    | 13,220    | 13,273    | 13,325    | 13,354    | 13,409    | 13,469    | 13,534    | 13,590    |
| 15,967    | 15,967    | 16,396    | 16,451    | 16,536    | 16,536    | 16,643    | 16,718    | 16,770    | 16,831    | 16,895    | 16,942    |
| 545,040   | 551,232   | 557,337   | 563,628   | 567,375   | 570,024   | 573,811   | 577,891   | 582,407   | 587,023   | 591,283   | 594,287   |
| 226,153   | 228,668   | 231,895   | 235,168   | 237,030   | 238,861   | 241,677   | 243,982   | 246,741   | 249,630   | 252,222   | 253,949   |
| 3,699     | 4,022     | 4,241     | 4,510     | 4,697     | 4,839     | 4,965     | 5,176     | 5,372     | 5,587     | 5,864     | 6,111     |
| 49,806    | 50,336    | 50,935    | 51,793    | 52,433    | 52,829    | 52,969    | 53,280    | 54,533    | 55,006    | 55,735    | 56,275    |
| 26,133    | 26,631    | 27,173    | 27,477    | 27,660    | 27,942    | 28,326    | 28,696    | 29,120    | 29,369    | 29,662    | 29,853    |
| 199,893   | 201,727   | 204,023   | 205,851   | 207,413   | 209,186   | 210,926   | 213,221   | 215,053   | 217,346   | 219,702   | 221,595   |
| 76,522    | 77,565    | 78,632    | 79,676    | 80,415    | 81,006    | 81,847    | 82,336    | 83,277    | 84,317    | 85,317    | 85,932    |
| 32,547    | 32,547    | 33,885    | 33,885    | 33,885    | 35,167    | 35,167    | 35,890    | 35,890    | 36,856    | 36,856    | 36,856    |
| 36,945    | 37,686    | 38,298    | 38,930    | 39,315    | 39,691    | 40,299    | 40,926    | 41,626    | 42,265    | 43,066    | 43,529    |
| 134,304   | 135,439   | 136,737   | 136,737   | 137,918   | 138,485   | 139,125   | 139,903   | 140,821   | 141,720   | 141,720   | 142,943   |
| 121,936   | 122,255   | 124,081   | 123,199   | 123,593   | 123,842   | 124,063   | 124,415   | 124,728   | 125,159   | 125,268   | 125,268   |
| 98,160    | 98,875    | 99,693    | 100,212   | 100,715   | 101,235   | 101,649   | 102,229   | 102,899   | 103,523   | 104,102   | 104,669   |
| 4,089     | 4,115     | 4,144     | 4,168     | 4,197     | 4,213     | 4,235     | 4,253     | 4,285     | 4,316     | 4,335     | 4,356     |
| 98,689    | 99,856    | 100,724   | 101,782   | 102,259   | 102,749   | 103,403   | 104,091   | 104,618   | 104,618   | 106,044   | 106,808   |
| 62,296    | 63,723    | 64,413    | 65,162    | 65,716    | 65,716    | 66,061    | 67,308    | 68,133    | 68,133    | 69,584    | 70,298    |
| 62,530    | 63,797    | 65,270    | 66,397    | 67,475    | 68,623    | 69,417    | 70,675    | 71,733    | 72,964    | 74,257    | 75,075    |
| 69,374    | 69,986    | 70,930    | 71,755    | 72,136    | 73,207    | 73,207    | 75,449    | 75,449    | 77,268    | 77,894    | 78,405    |
| 5,403     | 5,539     | 5,541     | 5,659     | 5,779     | 5,847     | 5,847     | 5,956     | 6,214     | 6,216     | 6,376     | 6,490     |
| 139,061   | 140,824   | 142,170   | 143,706   | 144,952   | 145,516   | 146,779   | 147,932   | 149,904   | 151,912   | 153,641   | 155,113   |
| 8,171     | 8,322     | 8,444     | 8,587     | 8,647     | 8,782     | 8,968     | 9,242     | 9,474     | 9,736     | 9,876     | 10,000    |
| 29,244    | 29,660    | 29,988    | 30,241    | 30,372    | 30,563    | 30,825    | 31,040    | 31,348    | 31,626    | 31,780    | 31,889    |
| 6,887     | 6,921     | 6,964     | 6,980     | 6,988     | 7,004     | 7,017     | 7,036     | 7,050     | 7,071     | 7,092     | 7,107     |
| 185,938   | 186,594   | 187,164   | 187,442   | 187,455   | 187,767   | 188,098   | 188,427   | 188,527   | 188,817   | 189,236   | 189,494   |
| 22,816    | 22,987    | 23,160    | 23,302    | 23,408    | 23,500    | 23,579    | 23,749    | 23,951    | 24,095    | 24,302    | 24,396    |
| 58,270    | 58,856    | 59,955    | 60,814    | 61,511    | 62,171    | 62,854    | 63,248    | 63,804    | 64,697    | 65,334    | 65,866    |
| 424329    | 424955    | 425315    | 426386    | 426909    | 427270    | 427897    | 428558    | 429087    | 429727    | 430408    | 430885    |
| 104,248   | 105,426   | 106,557   | 107,674   | 108,287   | 109,062   | 109,923   | 110,881   | 112,003   | 113,046   | 114,165   | 114,802   |
| 48,700    | 49,505    | 50,384    | 51,387    | 51,387    | 52,468    | 53,264    | 54,132    | 54,993    | 56,079    | 57,113    | 57,686    |
| 22,022    | 22,300    | 22,613    | 23,018    | 23,744    | 23,451    | 23,676    | 23,870    | 24,165    | 24,421    | 24,710    | 24,937    |
| 121,130   | 122,121   | 122,950   | 123,800   | 124,460   | 124,844   | 125,579   | 126,149   | 126,940   | 127,633   | 128,429   | 129,048   |
| 20,129    | 20,240    | 20,355    | 20,355    | 20,335    | 20,572    | 20,692    | 20,795    | 20,871    | 21,022    | 21,022    | 21,022    |
| 102,974   | 103,909   | 104,841   | 105,882   | 106,497   | 106,953   | 107,672   | 108,411   | 109,320   | 110,378   | 111,295   | 111,988   |
| 9,815     | 9,897     | 10,024    | 10,118    | 10,274    | 10,360    | 10,443    | 10,566    | 10,691    | 10,884    | 11,135    | 11,276    |
| 126,393   | 128,511   | 130,458   | 131,747   | 133,708   | 134,744   | 135,778   | 137,800   | 139,175   | 140,844   | 142,083   | 143,937   |
| 506,820   | 513,575   | 520,593   | 528,838   | 535,042   | 542,950   | 550,232   | 557,256   | 562,559   | 567,580   | 573,139   | 577,537   |
| 45,722    | 46,155    | 46,628    | 46,942    | 47,248    | 47,487    | 47,785    | 48,260    | 48,761    | 49,088    | 49,416    | 49,728    |
| 103,623   | 104,838   | 105,753   | 106,691   | 107,421   | 108,283   | 109,019   | 109,882   | 110,860   | 112,072   | 112,072   | 113,630   |
| 1,478     | 1,484     | 1,501     | 1,509     | 1,515     | 1,527     | 1,530     | 1,533     | 1,537     | 1,541     | 1,553     | 1,557     |
| 64,702    | 65,339    | 66,139    | 66,885    | 67,461    | 67,721    | 68,264    | 68,689    | 69,389    | 69,779    | 70,595    | 71,012    |
| 66,654    | 67,622    | 68,681    | 69,547    | 70,246    | 70,715    | 71,424    | 72,134    | 72,893    | 73,751    | 74,726    | 75,205    |
| 8,008     | 8,151     | 8,274     | 8,457     | 8,564     | 8,632     | 8,731     | 8,801     | 8,982     | 9,066     | 9,185     | 9,272     |
| 3,086     | 3,119     | 3,183     | 3,227     | 3,286     | 3,331     | 3,363     | 3,430     | 3,468     | 3,524     | 3,543     | 3,579     |

eTable 4. COVID-19 death

| Date/Total | 1/22/2020 | 1/23/2020 | 1/24/2020 | 1/25/2020 | 1/26/2020 | 1/27/2020 | 1/28/2020 | 1/29/2020 | 1/30/2020 | 1/31/2020 | 2/1/2020 | 2/2/2020 | 2/3/2020 | 2/4/2020 | 2/5/2020 | 2/6/2020 | 2/7/2020 | 2/8/2020 | 2/9/2020 | 2/10/2020 |
|------------|-----------|-----------|-----------|-----------|-----------|-----------|-----------|-----------|-----------|-----------|----------|----------|----------|----------|----------|----------|----------|----------|----------|-----------|
| Death      |           |           |           |           |           |           |           |           |           |           |          |          |          |          |          |          |          |          |          |           |
| AK         | 0         | 0         | 0         | 0         | 0         | 0         | 0         | 0         | 0         | 0         | 0        | 0        | 0        | 0        | 0        | 0        | 0        | 0        | 0        | 0         |
| AL         | 0         | 0         | 0         | 0         | 0         | 0         | 0         | 0         | 0         | 0         | 0        | 0        | 0        | 0        | 0        | 0        | 0        | 0        | 0        | 0         |
| AR         | 0         | 0         | 0         | 0         | 0         | 0         | 0         | 0         | 0         | 0         | 0        | 0        | 0        | 0        | 0        | 0        | 0        | 0        | 0        | 0         |
| AZ         | 0         | 0         | 0         | 0         | 0         | 0         | 0         | 0         | 0         | 0         | 0        | 0        | 0        | 0        | 0        | 0        | 0        | 0        | 0        | 0         |
| CA         | 0         | 0         | 0         | 0         | 0         | 0         | 0         | 0         | 0         | 0         | 0        | 0        | 0        | 0        | 0        | 0        | 0        | 0        | 0        | 0         |
| CO         | 0         | 0         | 0         | 0         | 0         | 0         | 0         | 0         | 0         | 0         | 0        | 0        | 0        | 0        | 0        | 0        | 0        | 0        | 0        | 0         |
| CT         | 0         | 0         | 0         | 0         | 0         | 0         | 0         | 0         | 0         | 0         | 0        | 0        | 0        | 0        | 0        | 0        | 0        | 0        | 0        | 0         |
| DC         | 0         | 0         | 0         | 0         | 0         | 0         | 0         | 0         | 0         | 0         | 0        | 0        | 0        | 0        | 0        | 0        | 0        | 0        | 0        | 0         |
| DE         | 0         | 0         | 0         | 0         | 0         | 0         | 0         | 0         | 0         | 0         | 0        | 0        | 0        | 0        | 0        | 0        | 0        | 0        | 0        | 0         |
| FL         | 0         | 0         | 0         | 0         | 0         | 0         | 0         | 0         | 0         | 0         | 0        | 0        | 0        | 0        | 0        | 0        | 0        | 0        | 0        | 0         |
| GA         | 0         | 0         | 0         | 0         | 0         | 0         | 0         | 0         | 0         | 0         | 0        | 0        | 0        | 0        | 0        | 0        | 0        | 0        | 0        | 0         |
| HI         | 0         | 0         | 0         | 0         | 0         | 0         | 0         | 0         | 0         | 0         | 0        | 0        | 0        | 0        | 0        | 0        | 0        | 0        | 0        | 0         |
| IA         | 0         | 0         | 0         | 0         | 0         | 0         | 0         | 0         | 0         | 0         | 0        | 0        | 0        | 0        | 0        | 0        | 0        | 0        | 0        | 0         |
| ID         | 0         | 0         | 0         | 0         | 0         | 0         | 0         | 0         | 0         | 0         | 0        | 0        | 0        | 0        | 0        | 0        | 0        | 0        | 0        | 0         |
| IL         | 0         | 0         | 0         | 0         | 0         | 0         | 0         | 0         | 0         | 0         | 0        | 0        | 0        | 0        | 0        | 0        | 0        | 0        | 0        | 0         |
| IN         | 0         | 0         | 0         | 0         | 0         | 0         | 0         | 0         | 0         | 0         | 0        | 0        | 0        | 0        | 0        | 0        | 0        | 0        | 0        | 0         |
| KS         | 0         | 0         | 0         | 0         | 0         | 0         | 0         | 0         | 0         | 0         | 0        | 0        | 0        | 0        | 0        | 0        | 0        | 0        | 0        | 0         |
| KY         | 0         | 0         | 0         | 0         | 0         | 0         | 0         | 0         | 0         | 0         | 0        | 0        | 0        | 0        | 0        | 0        | 0        | 0        | 0        | 0         |
| LA         | 0         | 0         | 0         | 0         | 0         | 0         | 0         | 0         | 0         | 0         | 0        | 0        | 0        | 0        | 0        | 0        | 0        | 0        | 0        | 0         |
| MA         | 0         | 0         | 0         | 0         | 0         | 0         | 0         | 0         | 0         | 0         | 0        | 0        | 0        | 0        | 0        | 0        | 0        | 0        | 0        | 0         |
| MD         | 0         | 0         | 0         | 0         | 0         | 0         | 0         | 0         | 0         | 0         | 0        | 0        | 0        | 0        | 0        | 0        | 0        | 0        | 0        | 0         |
| ME         | 0         | 0         | 0         | 0         | 0         | 0         | 0         | 0         | 0         | 0         | 0        | 0        | 0        | 0        | 0        | 0        | 0        | 0        | 0        | 0         |
| MI         | 0         | 0         | 0         | 0         | 0         | 0         | 0         | 0         | 0         | 0         | 0        | 0        | 0        | 0        | 0        | 0        | 0        | 0        | 0        | 0         |
| MN         | 0         | 0         | 0         | 0         | 0         | 0         | 0         | 0         | 0         | 0         | 0        | 0        | 0        | 0        | 0        | 0        | 0        | 0        | 0        | 0         |
| MO         | 0         | 0         | 0         | 0         | 0         | 0         | 0         | 0         | 0         | 0         | 0        | 0        | 0        | 0        | 0        | 0        | 0        | 0        | 0        | 0         |
| MS         | 0         | 0         | 0         | 0         | 0         | 0         | 0         | 0         | 0         | 0         | 0        | 0        | 0        | 0        | 0        | 0        | 0        | 0        | 0        | 0         |
| MT         | 0         | 0         | 0         | 0         | 0         | 0         | 0         | 0         | 0         | 0         | 0        | 0        | 0        | 0        | 0        | 0        | 0        | 0        | 0        | 0         |
| NC         | 0         | 0         | 0         | 0         | 0         | 0         | 0         | 0         | 0         | 0         | 0        | 0        | 0        | 0        | 0        | 0        | 0        | 0        | 0        | 0         |
| ND         | 0         | 0         | 0         | 0         | 0         | 0         | 0         | 0         | 0         | 0         | 0        | 0        | 0        | 0        | 0        | 0        | 0        | 0        | 0        | 0         |
| NE         | 0         | 0         | 0         | 0         | 0         | 0         | 0         | 0         | 0         | 0         | 0        | 0        | 0        | 0        | 0        | 0        | 0        | 0        | 0        | 0         |
| NH         | 0         | 0         | 0         | 0         | 0         | 0         | 0         | 0         | 0         | 0         | 0        | 0        | 0        | 0        | 0        | 0        | 0        | 0        | 0        | 0         |
| NJ         | 0         | 0         | 0         | 0         | 0         | 0         | 0         | 0         | 0         | 0         | 0        | 0        | 0        | 0        | 0        | 0        | 0        | 0        | 0        | 0         |
| NM         | 0         | 0         | 0         | 0         | 0         | 0         | 0         | 0         | 0         | 0         | 0        | 0        | 0        | 0        | 0        | 0        | 0        | 0        | 0        | 0         |
| NV         | 0         | 0         | 0         | 0         | 0         | 0         | 0         | 0         | 0         | 0         | 0        | 0        | 0        | 0        | 0        | 0        | 0        | 0        | 0        | 0         |
| NY         | 0         | 0         | 0         | 0         | 0         | 0         | 0         | 0         | 0         | 0         | 0        | 0        | 0        | 0        | 0        | 0        | 0        | 0        | 0        | 0         |
| OH         | 0         | 0         | 0         | 0         | 0         | 0         | 0         | 0         | 0         | 0         | 0        | 0        | 0        | 0        | 0        | 0        | 0        | 0        | 0        | 0         |
| OK         | 0         | 0         | 0         | 0         | 0         | 0         | 0         | 0         | 0         | 0         | 0        | 0        | 0        | 0        | 0        | 0        | 0        | 0        | 0        | 0         |
| OR         | 0         | 0         | 0         | 0         | 0         | 0         | 0         | 0         | 0         | 0         | 0        | 0        | 0        | 0        | 0        | 0        | 0        | 0        | 0        | 0         |
| PA         | 0         | 0         | 0         | 0         | 0         | 0         | 0         | 0         | 0         | 0         | 0        | 0        | 0        | 0        | 0        | 0        | 0        | 0        | 0        | 0         |
| RI         | 0         | 0         | 0         | 0         | 0         | 0         | 0         | 0         | 0         | 0         | 0        | 0        | 0        | 0        | 0        | 0        | 0        | 0        | 0        | 0         |
| SC         | 0         | 0         | 0         | 0         | 0         | 0         | 0         | 0         | 0         | 0         | 0        | 0        | 0        | 0        | 0        | 0        | 0        | 0        | 0        | 0         |
| SD         | 0         | 0         | 0         | 0         | 0         | 0         | 0         | 0         | 0         | 0         | 0        | 0        | 0        | 0        | 0        | 0        | 0        | 0        | 0        | 0         |
| TN         | 0         | 0         | 0         | 0         | 0         | 0         | 0         | 0         | 0         | 0         | 0        | 0        | 0        | 0        | 0        | 0        | 0        | 0        | 0        | 0         |
| TX         | 0         | 0         | 0         | 0         | 0         | 0         | 0         | 0         | 0         | 0         | 0        | 0        | 0        | 0        | 0        | 0        | 0        | 0        | 0        | 0         |
| UT         | 0         | 0         | 0         | 0         | 0         | 0         | 0         | 0         | 0         | 0         | 0        | 0        | 0        | 0        | 0        | 0        | 0        | 0        | 0        | 0         |
| VA         | 0         | 0         | 0         | 0         | 0         | 0         | 0         | 0         | 0         | 0         | 0        | 0        | 0        | 0        | 0        | 0        | 0        | 0        | 0        | 0         |
| VT         | 0         | 0         | 0         | 0         | 0         | 0         | 0         | 0         | 0         | 0         | 0        | 0        | 0        | 0        | 0        | 0        | 0        | 0        | 0        | 0         |
| WA         | 0         | 0         | 0         | 0         | 0         | 0         | 0         | 0         | 0         | 0         | 0        | 0        | 0        | 0        | 0        | 0        | 0        | 0        | 0        | 0         |
| WI         | 0         | 0         | 0         | 0         | 0         | 0         | 0         | 0         | 0         | 0         | 0        | 0        | 0        | 0        | 0        | 0        | 0        | 0        | 0        | 0         |
| WV         | 0         | 0         | 0         | 0         | 0         | 0         | 0         | 0         | 0         | 0         | 0        | 0        | 0        | 0        | 0        | 0        | 0        | 0        | 0        | 0         |
| WY         | 0         | 0         | 0         | 0         | 0         | 0         | 0         | 0         | 0         | 0         | 0        | 0        | 0        | 0        | 0        | 0        | 0        | 0        | 0        | 0         |







| 3/23/2020 | 3/24/2020 | 3/25/2020 | 3/26/2020 | 3/27/2020 | 3/28/2020 | 3/29/2020 | 3/30/2020 | 3/31/2020 | 4/1/2020 | 4/2/2020 | 4/3/2020 | 4/4/2020 | 4/5/2020 | 4/6/2020 | 4/7/2020 | 4/8/2020 | 4/9/2020 | 4/10/2020 | 4/11/2020 | 4/12/2020 |
|-----------|-----------|-----------|-----------|-----------|-----------|-----------|-----------|-----------|----------|----------|----------|----------|----------|----------|----------|----------|----------|-----------|-----------|-----------|
| 0         | 1         | 1         | 1         | 2         | 2         | 3         | 3         | 3         | 3        | 3        | 3        | 5        | 6        | 6        | 6        | 7        | 7        | 7         | 8         | 8         |
| 0         | 0         | 0         | 1         | 3         | 3         | 4         | 6         | 13        | 17       | 17       | 21       | 26       | 31       | 32       | 39       | 48       | 48       | 58        | 60        | 61        |
| 0         | 2         | 2         | 3         | 3         | 5         | 6         | 7         | 8         | 10       | 12       | 12       | 14       | 16       | 16       | 18       | 18       | 21       | 24        | 27        | 29        |
| 2         | 5         | 6         | 8         | 13        | 15        | 17        | 20        | 24        | 29       | 32       | 41       | 52       | 64       | 65       | 73       | 80       | 89       | 97        | 108       | 115       |
| 35        | 44        | 57        | 64        | 107       | 119       | 137       | 151       | 172       | 172      | 203      | 270      | 276      | 319      | 343      | 374      | 442      | 492      | 541       | 609       | 651       |
| 7         | 11        | 19        | 24        | 31        | 44        | 47        | 51        | 69        | 80       | 97       | 111      | 126      | 140      | 150      | 179      | 193      | 226      | 250       | 274       | 290       |
| 10        | 12        | 19        | 21        | 27        | 33        | 34        | 36        | 69        | 85       | 112      | 132      | 165      | 189      | 206      | 277      | 335      | 380      | 444       | 494       | 554       |
| 2         | 2         | 3         | 3         | 4         | 5         | 9         | 9         | 9         | 11       | 12       | 15       | 21       | 22       | 24       | 24       | 27       | 32       | 38        | 47        | 50        |
| 0         | 0         | 0         | 2         | 2         | 5         | 6         | 7         | 10        | 11       | 12       | 14       | 14       | 14       | 15       | 16       | 19       | 23       | 32        | 33        | 35        |
| 17        | 20        | 23        | 29        | 46        | 56        | 60        | 71        | 85        | 101      | 144      | 170      | 195      | 221      | 254      | 296      | 323      | 371      | 419       | 446       | 461       |
| 31        | 38        | 47        | 60        | 65        | 79        | 84        | 103       | 130       | 154      | 176      | 198      | 208      | 219      | 319      | 351      | 371      | 413      | 420       | 432       | 447       |
| 0         | 0         | 0         | 0         | 0         | 0         | 0         | 0         | 1         | 1        | 2        | 3        | 4        | 4        | 5        | 5        | 5        | 6        | 8         | 9         | 9         |
| 0         | 0         | 1         | 1         | 3         | 3         | 4         | 6         | 7         | 9        | 11       | 11       | 14       | 22       | 25       | 26       | 27       | 29       | 31        | 34        | 41        |
| 0         | 0         | 0         | 3         | 4         | 5         | 6         | 7         | 9         | 9        | 9        | 10       | 10       | 10       | 13       | 15       | 18       | 24       | 25        | 27        | 27        |
| 12        | 16        | 19        | 26        | 34        | 47        | 65        | 73        | 99        | 141      | 157      | 210      | 243      | 274      | 307      | 380      | 462      | 528      | 596       | 677       | 720       |
| 7         | 12        | 14        | 17        | 24        | 31        | 32        | 35        | 49        | 65       | 78       | 102      | 116      | 127      | 139      | 173      | 203      | 245      | 300       | 350       | 350       |
| 2         | 2         | 2         | 3         | 4         | 5         | 6         | 8         | 9         | 10       | 13       | 17       | 21       | 23       | 25       | 27       | 39       | 44       | 52        | 56        | 57        |
| 4         | 4         | 5         | 5         | 8         | 9         | 9         | 11        | 18        | 20       | 31       | 37       | 40       | 45       | 59       | 65       | 73       | 79       | 90        | 94        | 97        |
| 34        | 46        | 73        | 83        | 119       | 137       | 151       | 185       | 239       | 273      | 310      | 370      | 409      | 477      | 512      | 582      | 652      | 702      | 755       | 806       | 840       |
| 9         | 11        | 15        | 25        | 35        | 44        | 48        | 56        | 89        | 122      | 154      | 192      | 216      | 231      | 260      | 356      | 433      | 503      | 599       | 692       | 756       |
| 3         | 4         | 4         | 5         | 5         | 5         | 10        | 18        | 18        | 31       | 36       | 42       | 53       | 91       | 103      | 124      | 138      | 171      | 171       | 206       | 262       |
| 0         | 0         | 0         | 0         | 1         | 1         | 3         | 5         | 5         | 7        | 7        | 9        | 10       | 10       | 10       | 12       | 14       | 16       | 17        | 19        | 19        |
| 15        | 24        | 43        | 60        | 92        | 111       | 132       | 184       | 259       | 337      | 417      | 478      | 540      | 617      | 727      | 845      | 959      | 1,076    | 1,278     | 1,391     | 1,487     |
| 1         | 1         | 2         | 4         | 4         | 5         | 10        | 10        | 17        | 18       | 22       | 22       | 24       | 29       | 34       | 39       | 50       | 57       | 57        | 67        | 70        |
| 3         | 5         | 8         | 8         | 9         | 10        | 12        | 13        | 14        | 18       | 19       | 19       | 24       | 34       | 39       | 53       | 58       | 77       | 96        | 109       | 110       |
| 1         | 2         | 5         | 7         | 8         | 13        | 16        | 20        | 22        | 26       | 29       | 29       | 35       | 51       | 59       | 67       | 76       | 82       | 82        | 93        | 98        |
| 0         | 0         | 0         | 1         | 1         | 1         | 2         | 4         | 5         | 5        | 5        | 5        | 6        | 6        | 6        | 6        | 6        | 6        | 6         | 6         | 6         |
| 0         | 0         | 1         | 3         | 3         | 4         | 6         | 8         | 9         | 16       | 19       | 21       | 24       | 33       | 33       | 46       | 65       | 65       | 74        | 80        | 81        |
| 0         | 0         | 0         | 0         | 1         | 1         | 1         | 3         | 3         | 3        | 3        | 3        | 3        | 3        | 3        | 4        | 4        | 5        | 6         | 7         | 8         |
| 0         | 0         | 0         | 0         | 2         | 2         | 2         | 2         | 3         | 4        | 5        | 6        | 8        | 8        | 8        | 10       | 14       | 15       | 17        | 17        | 17        |
| 1         | 1         | 1         | 1         | 2         | 2         | 3         | 3         | 3         | 4        | 5        | 7        | 9        | 9        | 9        | 13       | 18       | 21       | 22        | 23        | 23        |
| 27        | 44        | 62        | 81        | 108       | 140       | 161       | 198       | 267       | 355      | 537      | 646      | 846      | 917      | 1,003    | 1,232    | 1,504    | 1,700    | 1,932     | 2,187     | 2,350     |
| 0         | 0         | 1         | 1         | 1         | 2         | 2         | 4         | 5         | 6        | 7        | 10       | 11       | 12       | 12       | 13       | 16       | 17       | 19        | 20        | 26        |
| 4         | 4         | 6         | 10        | 29        | 14        | 15        | 17        | 26        | 32       | 38       | 43       | 45       | 46       | 58       | 71       | 80       | 85       | 102       | 112       | 114       |
| 156       | 231       | 332       | 424       | 546       | 779       | 895       | 1069      | 1307      | 1672     | 1957     | 2375     | 2820     | 3489     | 5940     | 5489     | 6240     | 7451     | 7844      | 8627      | 9162      |
| 6         | 8         | 10        | 15        | 19        | 25        | 29        | 39        | 55        | 65       | 81       | 91       | 102      | 119      | 142      | 167      | 193      | 213      | 231       | 247       | 248       |
| 2         | 3         | 7         | 7         | 8         | 15        | 17        | 17        | 23        | 30       | 34       | 38       | 42       | 46       | 51       | 67       | 79       | 80       | 88        | 94        | 96        |
| 5         | 8         | 10        | 11        | 12        | 13        | 13        | 16        | 18        | 18       | 21       | 22       | 26       | 27       | 29       | 33       | 38       | 44       | 48        | 51        | 52        |
| 2         | 7         | 10        | 16        | 22        | 34        | 38        | 49        | 63        | 74       | 90       | 102      | 136      | 150      | 162      | 240      | 310      | 338      | 416       | 494       | 507       |
| 0         | 0         | 0         | 0         | 0         | 2         | 3         | 4         | 8         | 10       | 12       | 14       | 17       | 25       | 27       | 30       | 35       | 47       | 49        | 56        | 63        |
| 5         | 7         | 7         | 9         | 13        | 15        | 16        | 18        | 22        | 26       | 31       | 34       | 40       | 44       | 48       | 51       | 63       | 67       | 72        | 80        | 82        |
| 1         | 1         | 1         | 1         | 1         | 1         | 1         | 1         | 1         | 2        | 2        | 2        | 2        | 2        | 2        | 4        | 6        | 6        | 6         | 6         | 6         |
| 2         | 2         | 3         | 3         | 6         | 6         | 7         | 13        | 23        | 23       | 32       | 36       | 42       | 44       | 65       | 72       | 79       | 94       | 98        | 100       | 101       |
| 8         | 11        | 12        | 18        | 23        | 27        | 34        | 38        | 41        | 58       | 70       | 90       | 105      | 127      | 140      | 154      | 177      | 199      | 226       | 254       | 271       |
| 1         | 1         | 1         | 2         | 2         | 2         | 3         | 5         | 5         | 7        | 7        | 7        | 8        | 8        | 13       | 13       | 13       | 15       | 17        | 18        | 18        |
| 6         | 9         | 13        | 14        | 14        | 17        | 25        | 27        | 34        | 41       | 46       | 46       | 52       | 54       | 63       | 75       | 109      | 121      | 121       | 130       | 149       |
| 5         | 7         | 8         | 8         | 10        | 12        | 12        | 12        | 13        | 16       | 17       | 17       | 20       | 22       | 23       | 23       | 23       | 24       | 25        | 27        | 27        |
| 110       | 123       | 132       | 147       | 175       | 189       | 189       | 195       | 195       | 246      | 261      | 284      | 310      | 337      | 371      | 394      | 420      | 445      | 475       | 491       | 508       |
| 5         | 5         | 6         | 8         | 13        | 13        | 13        | 14        | 16        | 24       | 31       | 37       | 56       | 68       | 77       | 92       | 99       | 111      | 128       | 137       | 144       |
| 0         | 0         | 0         | 0         | 0         | 0         | 1         | 1         | 1         | 2        | 2        | 2        | 2        | 3        | 4        | 4        | 4        | 5        | 5         | 6         | 8         |
| 0         | 0         | 0         | 0         | 0         | 0         | 0         | 0         | 0         | 0        | 0        | 0        | 0        | 0        | 0        | 0        | 0        | 0        | 0         | 0         | 0         |

| 4/13/2020 | 4/14/2020 | 4/15/2020 | 4/16/2020 | 4/17/2020 | 4/18/2020 | 4/19/2020 | 4/20/2020 | 4/21/2020 | 4/22/2020 | 4/23/2020 | 4/24/2020 | 4/25/2020 | 4/26/2020 | 4/27/2020 | 4/28/2020 | 4/29/2020 | 4/30/2020 | 5/1/2020 | 5/2/2020 | 5/3/2020 |
|-----------|-----------|-----------|-----------|-----------|-----------|-----------|-----------|-----------|-----------|-----------|-----------|-----------|-----------|-----------|-----------|-----------|-----------|----------|----------|----------|
| 8         | 9         | 9         | 9         | 9         | 9         | 9         | 9         | 9         | 9         | 9         | 9         | 9         | 9         | 9         | 9         | 9         | 9         | 9        | 9        | 9        |
| 62        | 73        | 75        | 82        | 96        | 113       | 165       | 147       | 180       | 187       | 198       | 209       | 213       | 220       | 228       | 243       | 260       | 280       | 289      | 288      | 290      |
| 30        | 32        | 33        | 37        | 40        | 41        | 40        | 42        | 43        | 42        | 45        | 47        | 48        | 49        | 50        | 52        | 59        | 61        | 64       | 72       | 76       |
| 122       | 131       | 142       | 150       | 169       | 177       | 184       | 187       | 208       | 229       | 249       | 266       | 273       | 275       | 275       | 293       | 254       | 320       | 330      | 348      | 362      |
| 687       | 758       | 821       | 890       | 985       | 1,072     | 1,072     | 1,208     | 1,268     | 1,354     | 1,469     | 1,562     | 1,651     | 1,710     | 1,755     | 1,809     | 1,887     | 1,982     | 2,073    | 2,171    | 2,215    |
| 308       | 329       | 357       | 373       | 391       | 411       | 421       | 448       | 485       | 507       | 551       | 672       | 670       | 679       | 706       | 736       | 766       | 777       | 820      | 832      | 842      |
| 602       | 608       | 868       | 971       | 1,036     | 1,086     | 1,127     | 1,331     | 1,423     | 1,544     | 1,639     | 1,764     | 1,862     | 1,924     | 2,012     | 2,089     | 2,168     | 2,257     | 2,339    | 2,436    | 2,495    |
| 52        | 67        | 72        | 81        | 86        | 91        | 96        | 105       | 112       | 127       | 139       | 153       | 165       | 178       | 185       | 190       | 205       | 224       | 231      | 240      | 251      |
| 41        | 43        | 46        | 52        | 61        | 67        | 72        | 72        | 89        | 92        | 100       | 100       | 112       | 125       | 137       | 144       | 152       | 152       | 159      | 168      | 177      |
| 499       | 571       | 614       | 668       | 726       | 748       | 774       | 823       | 867       | 927       | 987       | 1,046     | 1,055     | 1,074     | 1,088     | 1,171     | 1,218     | 1,268     | 1,314    | 1,364    | 1,399    |
| 481       | 526       | 579       | 624       | 661       | 670       | 691       | 782       | 821       | 838       | 873       | 899       | 897       | 912       | 944       | 1,025     | 1,054     | 1,111     | 1,167    | 1,174    | 1,178    |
| 9         | 9         | 9         | 9         | 9         | 9         | 10        | 10        | 12        | 12        | 12        | 13        | 14        | 14        | 16        | 16        | 16        | 16        | 16       | 16       | 17       |
| 43        | 49        | 53        | 60        | 64        | 74        | 75        | 79        | 83        | 90        | 96        | 107       | 112       | 118       | 127       | 136       | 148       | 162       | 170      | 175      | 184      |
| 33        | 39        | 41        | 41        | 43        | 44        | 45        | 48        | 51        | 54        | 54        | 54        | 56        | 56        | 58        | 60        | 60        | 63        | 63       | 64       | 64       |
| 794       | 868       | 948       | 1,072     | 1,134     | 1,259     | 1,290     | 1,349     | 1,468     | 1,565     | 1,688     | 1,795     | 1,874     | 1,933     | 1,983     | 2,125     | 2,215     | 2,355     | 2,457    | 2,559    | 2,618    |
| 350       | 387       | 436       | 477       | 519       | 545       | 562       | 569       | 630       | 661       | 706       | 741       | 872       | 901       | 932       | 992       | 1,065     | 1,114     | 1,175    | 1,229    | 1,246    |
| 62        | 71        | 76        | 80        | 88        | 88        | 92        | 100       | 107       | 110       | 112       | 111       | 117       | 118       | 120       | 124       | 125       | 129       | 130      | 131      | 134      |
| 104       | 115       | 122       | 129       | 137       | 144       | 148       | 154       | 171       | 185       | 191       | 200       | 205       | 208       | 213       | 225       | 235       | 240       | 248      | 248      | 253      |
| 884       | 1,013     | 1,103     | 1,156     | 1,213     | 1,267     | 1,296     | 1,328     | 1,405     | 1,532     | 1,599     | 1,601     | 1,644     | 1,729     | 1,740     | 1,801     | 1,845     | 1,905     | 1,970    | 1,950    | 2,012    |
| 844       | 957       | 1,108     | 1,245     | 1,404     | 1,560     | 1,706     | 1,809     | 1,961     | 2,182     | 2,360     | 2,556     | 2,730     | 2,899     | 3,003     | 3,153     | 3,405     | 3,562     | 3,716    | 3,846    | 4,004    |
| 302       | 413       | 459       | 494       | 494       | 534       | 582       | 652       | 698       | 748       | 798       | 798       | 875       | 945       | 1,016     | 1,078     | 1,140     | 1,192     | 1,192    | 1,251    | 1,317    |
| 19        | 20        | 24        | 27        | 29        | 32        | 34        | 35        | 36        | 39        | 44        | 47        | 50        | 50        | 51        | 51        | 53        | 55        | 55       | 56       | 57       |
| 1,602     | 1,768     | 1,921     | 2,093     | 2,226     | 2,307     | 2,391     | 2,468     | 2,700     | 2,813     | 2,977     | 3,084     | 3,273     | 3,315     | 3,407     | 3,567     | 3,670     | 3,789     | 3,866    | 4,020    | 4,049    |
| 79        | 87        | 90        | 101       | 115       | 121       | 143       | 160       | 179       | 179       | 221       | 221       | 244       | 272       | 301       | 319       | 343       | 343       | 371      | 395      | 428      |
| 114       | 133       | 147       | 152       | 165       | 175       | 176       | 177       | 189       | 208       | 218       | 262       | 273       | 274       | 288       | 314       | 318       | 329       | 337      | 351      | 352      |
| 111       | 122       | 129       | 140       | 140       | 152       | 169       | 183       | 183       | 201       | 209       | 209       | 221       | 229       | 239       | 250       | 250       | 282       | 281      | 291      | 310      |
| 7         | 7         | 7         | 8         | 8         | 10        | 10        | 12        | 13        | 14        | 14        | 14        | 14        | 14        | 16        | 15        | 16        | 16        | 16       | 16       | 16       |
| 86        | 108       | 117       | 131       | 152       | 164       | 172       | 179       | 213       | 242       | 253       | 269       | 289       | 299       | 306       | 342       | 354       | 378       | 399      | 420      | 422      |
| 8         | 9         | 9         | 9         | 9         | 9         | 10        | 13        | 13        | 14        | 15        | 15        | 16        | 17        | 19        | 19        | 19        | 19        | 23       | 24       | 25       |
| 18        | 20        | 21        | 24        | 24        | 28        | 28        | 33        | 38        | 42        | 47        | 50        | 53        | 56        | 55        | 55        | 68        | 70        | 73       | 76       | 78       |
| 23        | 27        | 32        | 34        | 37        | 38        | 41        | 42        | 42        | 48        | 51        | 53        | 60        | 60        | 60        | 60        | 66        | 72        | 81       | 84       | 86       |
| 2,443     | 2,805     | 3,156     | 3,518     | 3,840     | 4,070     | 4,202     | 4,377     | 4,753     | 5,063     | 5,368     | 5,617     | 5,863     | 5,938     | 6,044     | 6,442     | 6,770     | 7,228     | 7,538    | 7,742    | 7,871    |
| 31        | 36        | 36        | 44        | 51        | 53        | 55        | 58        | 65        | 71        | 78        | 84        | 93        | 99        | 104       | 110       | 112       | 123       | 131      | 139      | 151      |
| 120       | 130       | 137       | 142       | 151       | 155       | 157       | 164       | 170       | 179       | 197       | 203       | 206       | 213       | 213       | 232       | 237       | 252       | 254      | 257      | 262      |
| 8843      | 9522      | 14306     | 14724     | 15759     | 16274     | 17027     | 18367     | 19103     | 19256     | 20255     | 20400     | 20985     | 21504     | 21883     | 22275     | 22759     | 23211     | 23673    | 23826    | 24560    |
| 268       | 324       | 361       | 389       | 418       | 451       | 471       | 509       | 557       | 610       | 656       | 690       | 711       | 728       | 753       | 799       | 937       | 975       | 1,002    | 1,021    | 1,038    |
| 99        | 108       | 123       | 131       | 136       | 139       | 140       | 143       | 164       | 170       | 179       | 188       | 194       | 195       | 197       | 207       | 214       | 222       | 230      | 238      | 238      |
| 53        | 55        | 58        | 64        | 70        | 72        | 74        | 75        | 78        | 78        | 83        | 86        | 87        | 91        | 92        | 99        | 101       | 103       | 104      | 109      | 109      |
| 524       | 584       | 647       | 707       | 756       | 836       | 1,112     | 1,204     | 1,564     | 1,622     | 1,421     | 1,492     | 1,537     | 1,550     | 1,597     | 1,716     | 2,195     | 2,292     | 2,354    | 2,418    | 2,444    |
| 73        | 80        | 87        | 114       | 118       | 137       | 150       | 155       | 181       | 186       | 189       | 202       | 215       | 226       | 233       | 239       | 251       | 266       | 279      | 296      | 320      |
| 87        | 97        | 107       | 109       | 116       | 119       | 120       | 124       | 135       | 140       | 150       | 157       | 166       | 174       | 177       | 192       | 203       | 244       | 256      | 267      | 275      |
| 6         | 6         | 6         | 7         | 7         | 7         | 7         | 7         | 8         | 9         | 9         | 10        | 10        | 11        | 11        | 11        | 13        | 17        | 21       | 21       | 21       |
| 109       | 124       | 134       | 141       | 141       | 145       | 147       | 152       | 157       | 165       | 170       | 168       | 176       | 181       | 184       | 188       | 192       | 199       | 204      | 209      | 210      |
| 287       | 318       | 364       | 393       | 428       | 453       | 477       | 495       | 517       | 543       | 561       | 593       | 623       | 648       | 663       | 690       | 732       | 782       | 816      | 847      | 867      |
| 18        | 20        | 21        | 22        | 23        | 25        | 28        | 32        | 34        | 35        | 38        | 39        | 41        | 41        | 44        | 45        | 46        | 46        | 46       | 49       | 50       |
| 154       | 195       | 208       | 231       | 231       | 258       | 300       | 324       | 324       | 372       | 410       | 436       | 436       | 458       | 492       | 522       | 552       | 581       | 581      | 616      | 684      |
| 28        | 29        | 30        | 35        | 35        | 38        | 38        | 38        | 40        | 40        | 43        | 44        | 46        | 46        | 47        | 47        | 47        | 49        | 50       | 51       | 52       |
| 508       | 546       | 567       | 583       | 603       | 624       | 635       | 652       | 682       | 692       | 711       | 723       | 738       | 749       | 765       | 786       | 801       | 814       | 824      | 830      | 834      |
| 154       | 170       | 182       | 197       | 205       | 211       | 220       | 230       | 242       | 246       | 257       | 262       | 266       | 272       | 281       | 300       | 308       | 316       | 327      | 334      | 339      |
| 9         | 10        | 12        | 13        | 16        | 18        | 18        | 24        | 26        | 29        | 31        | 32        | 33        | 34        | 37        | 38        | 40        | 44        | 47       | 50       | 50       |
| 1         | 1         | 2         | 2         | 2         | 2         | 2         | 2         | 6         | 6         | 7         | 7         | 7         | 7         | 7         | 7         | 7         | 7         | 7        | 7        | 7        |

| 5/4/2020 | 5/5/2020 | 5/6/2020 | 5/7/2020 | 5/8/2020 | 5/9/2020 | 5/10/2020 | 5/11/2020 | 5/12/2020 | 5/13/2020 | 5/14/2020 | 5/15/2020 | 5/16/2020 | 5/17/2020 | 5/18/2020 | 5/19/2020 | 5/20/2020 | 5/21/2020 | 5/22/2020 | 5/23/2020 | 5/24/2020 |
|----------|----------|----------|----------|----------|----------|-----------|-----------|-----------|-----------|-----------|-----------|-----------|-----------|-----------|-----------|-----------|-----------|-----------|-----------|-----------|
| 9        | 9        | 10       | 10       | 10       | 10       | 10        | 10        | 10        | 10        | 10        | 10        | 10        | 10        | 10        | 10        | 10        | 10        | 10        | 10        | 10        |
| 300      | 323      | 343      | 370      | 386      | 394      | 394       | 424       | 433       | 451       | 475       | 484       | 487       | 488       | 496       | 504       | 524       | 534       | 543       | 551       | 554       |
| 80       | 83       | 87       | 88       | 88       | 90       | 91        | 94        | 95        | 97        | 98        | 98        | 98        | 98        | 100       | 102       | 107       | 110       | 113       | 115       | 116       |
| 362      | 395      | 426      | 450      | 517      | 532      | 536       | 542       | 562       | 594       | 624       | 651       | 679       | 680       | 686       | 704       | 747       | 763       | 775       | 799       | 800       |
| 2,254    | 2,317    | 2,412    | 2,504    | 2,585    | 2,678    | 2,745     | 2,770     | 2,847     | 2,934     | 3,032     | 3,108     | 3,204     | 3,261     | 3,302     | 3,334     | 3,436     | 3,542     | 3,630     | 3,708     | 3,774     |
| 851      | 903      | 921      | 944      | 960      | 967      | 971       | 986       | 1,006     | 1,059     | 1,090     | 1,150     | 1,192     | 1,215     | 1,224     | 1,257     | 1,299     | 1,309     | 1,323     | 1,327     | 1,330     |
| 2,556    | 2,633    | 2,718    | 2,797    | 2,874    | 2,932    | 2,967     | 3,008     | 3,041     | 3,125     | 3,219     | 3,285     | 3,339     | 3,408     | 3,449     | 3,472     | 3,529     | 3,582     | 3,637     | 3,675     | 3,693     |
| 258      | 264      | 277      | 285      | 304      | 311      | 323       | 328       | 336       | 350       | 358       | 368       | 375       | 383       | 392       | 400       | 407       | 412       | 418       | 427       | 432       |
| 182      | 187      | 193      | 213      | 213      | 224      | 225       | 237       | 247       | 260       | 271       | 271       | 286       | 297       | 304       | 310       | 317       | 322       | 324       | 324       | 326       |
| 1,399    | 1,471    | 1,539    | 1,600    | 1,669    | 1,715    | 1,735     | 1,735     | 1,779     | 1,827     | 1,875     | 1,917     | 1,964     | 1,973     | 1,997     | 2,052     | 2,096     | 2,144     | 2,190     | 2,233     | 2,237     |
| 1,211    | 1,258    | 1,327    | 1,336    | 1,362    | 1,404    | 1,404     | 1,442     | 1,464     | 1,505     | 1,527     | 1,557     | 1,592     | 1,606     | 1,642     | 1,668     | 1,689     | 1,758     | 1,808     | 1,814     | 1,827     |
| 17       | 17       | 17       | 17       | 17       | 17       | 17        | 17        | 17        | 17        | 17        | 17        | 17        | 17        | 17        | 17        | 17        | 17        | 17        | 17        | 17        |
| 188      | 207      | 219      | 231      | 243      | 252      | 265       | 271       | 289       | 306       | 318       | 336       | 346       | 351       | 364       | 372       | 386       | 407       | 424       | 445       | 454       |
| 64       | 65       | 66       | 67       | 67       | 67       | 67        | 70        | 69        | 69        | 72        | 73        | 73        | 73        | 74        | 77        | 77        | 77        | 79        | 79        | 79        |
| 2,662    | 2,838    | 2,974    | 3,111    | 3,241    | 3,349    | 3,406     | 3,459     | 3,601     | 3,792     | 3,928     | 4,058     | 4,129     | 4,177     | 4,234     | 4,379     | 4,225     | 4,607     | 4,715     | 4,790     | 4,856     |
| 1,264    | 1,326    | 1,377    | 1,414    | 1,447    | 1,490    | 1,508     | 1,540     | 1,578     | 1,619     | 1,646     | 1,691     | 1,741     | 1,751     | 1,765     | 1,824     | 1,864     | 1,913     | 1,941     | 1,964     | 1,976     |
| 136      | 137      | 144      | 147      | 152      | 157      | 157       | 158       | 158       | 164       | 164       | 172       | 172       | 172       | 173       | 173       | 178       | 178       | 185       | 185       | 185       |
| 261      | 275      | 283      | 294      | 298      | 304      | 304       | 311       | 321       | 326       | 328       | 332       | 334       | 334       | 346       | 366       | 376       | 386       | 391       | 391       | 391       |
| 2,064    | 2,115    | 2,094    | 2,208    | 2,227    | 2,267    | 2,286     | 2,308     | 2,347     | 2,381     | 2,417     | 2,448     | 2,479     | 2,491     | 2,563     | 2,581     | 2,608     | 2,629     | 2,668     | 2,683     | 2,690     |
| 4,090    | 4,212    | 4,420    | 4,552    | 4,702    | 4,840    | 4,979     | 5,108     | 5,141     | 5,315     | 5,649     | 5,592     | 5,705     | 5,797     | 5,862     | 5,938     | 6,066     | 6,148     | 6,228     | 6,304     | 6,372     |
| 1,390    | 1,437    | 1,437    | 1,560    | 1,614    | 1,644    | 1,683     | 1,756     | 1,809     | 1,866     | 1,911     | 1,957     | 1,992     | 1,992     | 2,080     | 2,123     | 2,159     | 2,159     | 2,243     | 2,277     | 2,302     |
| 61       | 62       | 62       | 62       | 63       | 64       | 64        | 65        | 66        | 66        | 69        | 70        | 70        | 71        | 73        | 73        | 73        | 75        | 75        | 77        | 78        |
| 4,135    | 4,179    | 4,250    | 4,343    | 4,393    | 4,526    | 4,551     | 4,584     | 4,674     | 4,714     | 4,787     | 4,825     | 4,880     | 4,891     | 4,915     | 5,017     | 5,060     | 5,129     | 5,158     | 5,223     | 5,228     |
| 428      | 455      | 485      | 534      | 534      | 578      | 578       | 591       | 646       | 638       | 691       | 692       | 730       | 739       | 757       | 786       | 786       | 851       | 861       | 861       | 878       |
| 358      | 377      | 396      | 418      | 449      | 472      | 482       | 488       | 524       | 542       | 562       | 576       | 589       | 594       | 605       | 616       | 631       | 661       | 671       | 676       | 681       |
| 342      | 374      | 374      | 409      | 422      | 430      | 435       | 457       | 466       | 480       | 493       | 511       | 521       | 528       | 555       | 570       | 580       | 595       | 615       | 625       | 635       |
| 16       | 16       | 16       | 16       | 16       | 16       | 16        | 16        | 16        | 16        | 16        | 16        | 16        | 16        | 16        | 16        | 16        | 16        | 16        | 16        | 16        |
| 430      | 452      | 477      | 507      | 527      | 544      | 547       | 550       | 577       | 597       | 615       | 641       | 652       | 659       | 661       | 691       | 702       | 716       | 728       | 737       | 744       |
| 25       | 25       | 31       | 31       | 33       | 35       | 35        | 36        | 38        | 40        | 40        | 42        | 42        | 43        | 44        | 45        | 49        | 51        | 52        | 52        | 53        |
| 78       | 82       | 86       | 90       | 92       | 96       | 98        | 100       | 103       | 107       | 113       | 119       | 123       | 123       | 125       | 132       | 138       | 143       | 147       | 147       | 150       |
| 86       | 92       | 111      | 114      | 121      | 131      | 133       | 133       | 142       | 150       | 151       | 159       | 171       | 172       | 172       | 182       | 190       | 199       | 204       | 208       | 209       |
| 7,910    | 8,244    | 8,549    | 8,801    | 8,952    | 9,116    | 9,255     | 9,310     | 9,508     | 9,702     | 9,946     | 10,138    | 10,249    | 10,356    | 10,435    | 10,586    | 10,747    | 10,843    | 10,985    | 11,081    | 11,133    |
| 156      | 162      | 169      | 172      | 181      | 191      | 200       | 208       | 219       | 231       | 242       | 253       | 259       | 265       | 270       | 276       | 283       | 294       | 302       | 308       | 317       |
| 275      | 285      | 286      | 293      | 301      | 306      | 317       | 317       | 332       | 342       | 339       | 354       | 349       | 365       | 379       | 373       | 394       | 397       | 387       | 392       | 410       |
| 24717    | 25014    | 25779    | 26120    | 26359    | 26697    | 26923     | 27184     | 27282     | 27448     | 27617     | 27755     | 28097     | 28168     | 28302     | 28484     | 28609     | 28663     | 28802     | 28978     | 29046     |
| 1,056    | 1,135    | 1,225    | 1,271    | 1,306    | 1,331    | 1,341     | 1,357     | 1,436     | 1,483     | 1,534     | 1,581     | 1,610     | 1,625     | 1,657     | 1,720     | 1,781     | 1,836     | 1,872     | 1,956     | 1,969     |
| 238      | 239      | 253      | 254      | 254      | 261      | 272       | 269       | 269       | 280       | 283       | 288       | 283       | 288       | 293       | 293       | 293       | 300       | 300       | 305       | 310       |
| 109      | 113      | 115      | 121      | 124      | 127      | 127       | 130       | 130       | 134       | 137       | 137       | 137       | 137       | 138       | 140       | 144       | 145       | 147       | 147       | 148       |
| 2,458    | 3,012    | 3,106    | 3,416    | 3,616    | 3,688    | 3,707     | 3,731     | 3,806     | 3,943     | 4,218     | 4,342     | 4,403     | 4,418     | 4,418     | 4,418     | 4,767     | 4,418     | 5,096     | 5,124     | 5,139     |
| 341      | 355      | 370      | 388      | 399      | 418      | 422       | 430       | 444       | 462       | 468       | 479       | 489       | 499       | 506       | 532       | 538       | 556       | 579       | 597       | 608       |
| 283      | 296      | 305      | 316      | 320      | 330      | 331       | 346       | 355       | 362       | 371       | 380       | 380       | 385       | 391       | 399       | 407       | 416       | 419       | 425       | 435       |
| 21       | 24       | 29       | 31       | 31       | 34       | 34        | 34        | 39        | 39        | 43        | 44        | 44        | 44        | 44        | 46        | 46        | 48        | 50        | 50        | 50        |
| 219      | 226      | 239      | 237      | 241      | 242      | 243       | 251       | 264       | 273       | 287       | 290       | 295       | 298       | 301       | 305       | 310       | 314       | 316       | 330       | 337       |
| 884      | 906      | 948      | 973      | 1,004    | 1,049    | 1,088     | 1,100     | 1,133     | 1,158     | 1,216     | 1,272     | 1,305     | 1,336     | 1,347     | 1,369     | 1,419     | 1,440     | 1,480     | 1,506     | 1,519     |
| 56       | 58       | 58       | 61       | 66       | 67       | 67        | 72        | 75        | 75        | 77        | 78        | 79        | 80        | 85        | 91        | 92        | 94        | 96        | 97        | 98        |
| 684      | 713      | 713      | 812      | 812      | 827      | 850       | 891       | 927       | 955       | 977       | 1,002     | 1,009     | 1,014     | 1,041     | 1,074     | 1,099     | 1,136     | 1,159     | 1,171     | 1,208     |
| 52       | 52       | 52       | 53       | 53       | 53       | 53        | 53        | 53        | 53        | 53        | 53        | 53        | 54        | 54        | 54        | 54        | 54        | 54        | 54        | 54        |
| 841      | 862      | 870      | 891      | 905      | 921      | 931       | 945       | 962       | 975       | 983       | 992       | 1,000     | 1,001     | 1,002     | 1,031     | 1,037     | 1,044     | 1,050     | 1,057     | 1,061     |
| 340      | 353      | 362      | 374      | 384      | 398      | 400       | 409       | 418       | 421       | 434       | 445       | 453       | 453       | 459       | 467       | 481       | 487       | 496       | 507       | 510       |
| 50       | 50       | 51       | 51       | 52       | 53       | 54        | 57        | 58        | 59        | 62        | 64        | 65        | 67        | 68        | 68        | 69        | 71        | 72        | 72        | 72        |
| 7        | 7        | 7        | 7        | 7        | 7        | 7         | 7         | 7         | 7         | 7         | 7         | 7         | 8         | 10        | 10        | 11        | 12        | 12        | 12        | 12        |

| 5/25/2020 | 5/26/2020 | 5/27/2020 | 5/28/2020 | 5/29/2020 | 5/30/2020 | 5/31/2020 | 6/1/2020 | 6/2/2020 | 6/3/2020 | 6/4/2020 | 6/5/2020 | 6/6/2020 | 6/7/2020 | 6/8/2020 | 6/9/2020 | 6/10/2020 | 6/11/2020 | 6/12/2020 | 6/13/2020 | 6/14/2020 |
|-----------|-----------|-----------|-----------|-----------|-----------|-----------|----------|----------|----------|----------|----------|----------|----------|----------|----------|-----------|-----------|-----------|-----------|-----------|
| 10        | 10        | 10        | 10        | 10        | 10        | 10        | 10       | 10       | 10       | 10       | 10       | 10       | 10       | 10       | 11       | 11        | 11        | 11        | 12        | 12        |
| 568       | 579       | 584       | 594       | 613       | 620       | 632       | 646      | 653      | 653      | 674      | 688      | 692      | 728      | 729      | 744      | 755       | 769       | 774       | 776       |           |
| 117       | 119       | 120       | 125       | 132       | 133       | 133       | 133      | 136      | 142      | 151      | 152      | 154      | 154      | 155      | 161      | 165       | 171       | 176       | 177       | 179       |
| 806       | 807       | 831       | 857       | 885       | 903       | 906       | 917      | 941      | 981      | 996      | 1,012    | 1,042    | 1,044    | 1,047    | 1,070    | 1,095     | 1,127     | 1,144     | 1,183     | 1,186     |
| 3,795     | 3,814     | 3,884     | 3,973     | 4,068     | 4,156     | 4,213     | 4,251    | 4,286    | 4,361    | 4,422    | 4,485    | 4,559    | 4,626    | 4,653    | 4,697    | 4,776     | 4,881     | 4,943     | 4,989     | 5,063     |
| 1,331     | 1,350     | 1,392     | 1,421     | 1,436     | 1,443     | 1,445     | 1,458    | 1,474    | 1,494    | 1,512    | 1,524    | 1,527    | 1,527    | 1,543    | 1,553    | 1,573     | 1,583     | 1,595     | 1,598     | 1,599     |
| 3,742     | 3,769     | 3,803     | 3,826     | 3,868     | 3,912     | 3,944     | 3,964    | 3,972    | 3,989    | 4,007    | 4,038    | 4,055    | 4,071    | 4,084    | 4,097    | 4,120     | 4,146     | 4,159     | 4,186     | 4,201     |
| 440       | 440       | 445       | 453       | 460       | 462       | 466       | 468      | 470      | 473      | 475      | 479      | 483      | 489      | 491      | 495      | 499       | 502       | 506       | 511       | 515       |
| 337       | 344       | 345       | 356       | 361       | 366       | 369       | 373      | 375      | 386      | 388      | 390      | 398      | 398      | 410      | 413      | 414       | 414       | 418       | 422       | 423       |
| 2,252     | 2,259     | 2,319     | 2,364     | 2,413     | 2,447     | 2,451     | 2,460    | 2,530    | 2,566    | 2,607    | 2,660    | 2,688    | 2,700    | 2,712    | 2,765    | 2,801     | 2,848     | 2,877     | 2,925     | 2,931     |
| 1,830     | 1,874     | 1,909     | 1,973     | 1,971     | 2,003     | 2,052     | 2,074    | 2,102    | 2,123    | 2,147    | 2,174    | 2,160    | 2,180    | 2,208    | 2,285    | 2,329     | 2,375     | 2,418     | 2,446     | 2,451     |
| 17        | 17        | 17        | 17        | 17        | 17        | 17        | 17       | 17       | 17       | 17       | 17       | 17       | 17       | 17       | 17       | 17        | 17        | 17        | 17        | 17        |
| 459       | 475       | 492       | 506       | 523       | 531       | 534       | 549      | 561      | 574      | 580      | 592      | 598      | 604      | 614      | 624      | 631       | 640       | 643       | 650       | 652       |
| 79        | 81        | 82        | 82        | 82        | 82        | 82        | 83       | 83       | 83       | 83       | 83       | 83       | 83       | 83       | 85       | 85        | 86        | 87        | 87        | 87        |
| 4,884     | 4,923     | 5,083     | 5,186     | 5,270     | 5,330     | 5,390     | 5,412    | 5,525    | 5,621    | 5,736    | 5,795    | 5,864    | 5,904    | 6,102    | 6,196    | 6,273     | 6,363     | 6,441     | 6,470     | 6,489     |
| 1,984     | 2,004     | 2,030     | 2,068     | 2,110     | 2,125     | 2,134     | 2,142    | 2,197    | 2,207    | 2,231    | 2,258    | 2,292    | 2,303    | 2,316    | 2,339    | 2,355     | 2,380     | 2,396     | 2,413     | 2,422     |
| 188       | 188       | 205       | 205       | 208       | 208       | 208       | 217      | 217      | 222      | 222      | 232      | 232      | 232      | 236      | 236      | 240       | 240       | 243       | 243       | 243       |
| 391       | 394       | 400       | 409       | 418       | 431       | 431       | 439      | 442      | 450      | 458      | 466      | 470      | 470      | 472      | 477      | 484       | 493       | 497       | 499       | 499       |
| 2,690     | 2,701     | 2,722     | 2,740     | 2,766     | 2,785     | 2,791     | 2,801    | 2,835    | 2,870    | 2,883    | 2,912    | 2,925    | 2,936    | 2,944    | 2,957    | 2,968     | 2,987     | 2,996     | 3,004     | 3,014     |
| 6,416     | 6,473     | 6,547     | 6,640     | 6,718     | 6,768     | 6,846     | 7,035    | 7,085    | 7,012    | 7,201    | 7,235    | 7,289    | 7,316    | 7,353    | 7,408    | 7,454     | 7,492     | 7,538     | 7,576     | 7,624     |
| 2,333     | 2,392     | 2,428     | 2,466     | 2,509     | 2,532     | 2,552     | 2,597    | 2,641    | 2,668    | 2,702    | 2,740    | 2,749    | 2,776    | 2,811    | 2,844    | 2,875     | 2,900     | 2,926     | 2,939     | 2,947     |
| 79        | 79        | 84        | 85        | 89        | 89        | 89        | 94       | 95       | 95       | 95       | 98       | 99       | 99       | 99       | 100      | 100       | 100       | 100       | 100       | 101       |
| 5,240     | 5,266     | 5,334     | 5,372     | 5,406     | 5,463     | 5,491     | 5,516    | 5,553    | 5,570    | 5,585    | 5,855    | 5,891    | 5,895    | 5,912    | 5,943    | 5,955     | 5,985     | 5,990     | 6,013     | 6,016     |
| 908       | 908       | 942       | 1,006     | 1,006     | 1,050     | 1,060     | 1,060    | 1,082    | 1,097    | 1,126    | 1,181    | 1,197    | 1,208    | 1,228    | 1,267    | 1,280     | 1,280     | 1,305     | 1,314     | 1,335     |
| 685       | 686       | 696       | 707       | 738       | 771       | 772       | 773      | 783      | 786      | 789      | 799      | 809      | 809      | 819      | 840      | 848       | 860       | 872       | 879       | 879       |
| 652       | 671       | 692       | 710       | 723       | 734       | 739       | 768      | 782      | 794      | 794      | 803      | 817      | 837      | 837      | 868      | 868       | 868       | 889       | 889       | 895       |
| 16        | 17        | 17        | 17        | 17        | 17        | 17        | 17       | 17       | 17       | 17       | 18       | 18       | 18       | 18       | 18       | 18        | 18        | 18        | 18        | 19        |
| 764       | 766       | 794       | 827       | 859       | 877       | 886       | 898      | 921      | 939      | 960      | 966      | 992      | 996      | 1,006    | 1,029    | 1,053     | 1,064     | 1,092     | 1,104     | 1,109     |
| 54        | 54        | 56        | 57        | 59        | 60        | 61        | 61       | 65       | 66       | 66       | 71       | 72       | 72       | 72       | 73       | 74        | 74        | 74        | 74        | 74        |
| 150       | 153       | 163       | 164       | 170       | 170       | 170       | 178      | 181      | 187      | 186      | 186      | 188      | 188      | 188      | 191      | 195       | 212       | 216       | 216       | 216       |
| 210       | 214       | 223       | 232       | 238       | 242       | 245       | 245      | 256      | 265      | 273      | 278      | 283      | 286      | 286      | 294      | 301       | 308       | 315       | 318       | 320       |
| 11,144    | 11,191    | 11,339    | 11,401    | 11,531    | 11,634    | 11,698    | 11,721   | 11,770   | 11,880   | 11,970   | 12,049   | 12,106   | 12,176   | 12,214   | 12,303   | 12,377    | 12,443    | 12,489    | 12,589    | 12,625    |
| 320       | 325       | 329       | 335       | 344       | 351       | 356       | 362      | 367      | 375      | 383      | 387      | 392      | 396      | 400      | 404      | 410       | 420       | 426       | 431       | 435       |
| 412       | 396       | 402       | 427       | 415       | 417       | 438       | 421      | 420      | 445      | 429      | 452      | 437      | 438      | 461      | 444      | 448       | 476       | 462       | 481       | 464       |
| 29193     | 29289     | 29392     | 29500     | 29535     | 29612     | 29737     | 29766    | 29886    | 29918    | 30011    | 30066    | 30152    | 30216    | 30280    | 30351    | 30409     | 30481     | 30511     | 30565     | 30605     |
| 1,987     | 2,002     | 2,044     | 2,098     | 2,131     | 2,149     | 2,155     | 2,206    | 2,258    | 2,299    | 2,339    | 2,355    | 2,370    | 2,377    | 2,404    | 2,421    | 2,457     | 2,490     | 2,508     | 2,554     | 2,557     |
| 312       | 316       | 317       | 319       | 328       | 333       | 333       | 338      | 343      | 343      | 347      | 350      | 354      | 354      | 359      | 361      | 360       | 366       | 367       | 369       | 359       |
| 148       | 148       | 148       | 151       | 151       | 153       | 153       | 154      | 157      | 159      | 159      | 161      | 163      | 164      | 164      | 169      | 169       | 171       | 173       | 174       | 176       |
| 5,152     | 5,265     | 5,373     | 5,464     | 5,537     | 5,555     | 5,567     | 5,742    | 5,817    | 5,886    | 5,931    | 5,943    | 5,953    | 6,014    | 6,062    | 6,113    | 6,162     | 6,211     | 6,211     | 6,211     | 6,243     |
| 608       | 634       | 655       | 677       | 693       | 711       | 718       | 720      | 732      | 742      | 756      | 772      | 772      | 799      | 808      | 812      | 823       | 833       | 833       | 833       | 833       |
| 440       | 446       | 466       | 470       | 483       | 487       | 494       | 500      | 501      | 518      | 525      | 538      | 545      | 546      | 557      | 568      | 575       | 588       | 593       | 599       | 600       |
| 50        | 50        | 54        | 54        | 59        | 62        | 62        | 62       | 62       | 62       | 64       | 65       | 65       | 65       | 65       | 68       | 69        | 73        | 74        | 75        | 75        |
| 339       | 344       | 354       | 357       | 361       | 366       | 366       | 369      | 396      | 403      | 416      | 423      | 432      | 433      | 436      | 450      | 456       | 461       | 468       | 472       | 475       |
| 1,527     | 1,536     | 1,562     | 1,601     | 1,626     | 1,648     | 1,672     | 1,678    | 1,698    | 1,734    | 1,767    | 1,788    | 1,819    | 1,830    | 1,836    | 1,853    | 1,885     | 1,920     | 1,939     | 1,957     | 1,976     |
| 101       | 103       | 106       | 107       | 110       | 112       | 113       | 114      | 113      | 117      | 119      | 120      | 121      | 121      | 126      | 128      | 131       | 134       | 139       | 139       | 139       |
| 1,236     | 1,281     | 1,338     | 1,358     | 1,370     | 1,375     | 1,392     | 1,407    | 1,428    | 1,445    | 1,453    | 1,460    | 1,472    | 1,477    | 1,496    | 1,514    | 1,520     | 1,534     | 1,541     | 1,546     | 1,552     |
| 54        | 54        | 54        | 55        | 55        | 55        | 55        | 55       | 55       | 55       | 55       | 55       | 55       | 55       | 55       | 55       | 55        | 55        | 55        | 55        | 55        |
| 1,070     | 1,078     | 1,095     | 1,106     | 1,111     | 1,118     | 1,118     | 1,124    | 1,129    | 1,135    | 1,138    | 1,149    | 1,153    | 1,159    | 1,161    | 1,176    | 1,190     | 1,194     | 1,204     | 1,213     | 1,217     |
| 514       | 517       | 539       | 550       | 568       | 588       | 592       | 595      | 607      | 616      | 626      | 633      | 645      | 647      | 646      | 661      | 671       | 682       | 695       | 697       | 698       |
| 73        | 74        | 74        | 74        | 74        | 75        | 75        | 76       | 78       | 78       | 79       | 84       | 84       | 84       | 84       | 84       | 85        | 86        | 88        | 88        | 88        |
| 12        | 13        | 14        | 15        | 15        | 16        | 17        | 17       | 17       | 17       | 17       | 17       | 17       | 17       | 17       | 17       | 18        | 18        | 18        | 18        | 18        |

| 6/15/2020 | 6/16/2020 | 6/17/2020 | 6/18/2020 | 6/19/2020 | 6/20/2020 | 6/21/2020 | 6/22/2020 | 6/23/2020 | 6/24/2020 | 6/25/2020 | 6/26/2020 | 6/27/2020 | 6/28/2020 | 6/29/2020 | 6/30/2020 | 7/1/2020 | 7/2/2020 | 7/3/2020 | 7/4/2020 | 7/5/2020 |
|-----------|-----------|-----------|-----------|-----------|-----------|-----------|-----------|-----------|-----------|-----------|-----------|-----------|-----------|-----------|-----------|----------|----------|----------|----------|----------|
| 12        | 12        | 12        | 12        | 12        | 12        | 12        | 12        | 12        | 12        | 12        | 14        | 14        | 14        | 14        | 14        | 14       | 14       | 15       | 16       | 16       |
| 781       | 785       | 792       | 810       | 823       | 838       | 839       | 843       | 870       | 890       | 895       | 910       | 923       | 924       | 931       | 947       | 969      | 985      | 1,006    | 1,007    | 1,009    |
| 182       | 188       | 197       | 208       | 214       | 224       | 225       | 227       | 237       | 240       | 242       | 249       | 259       | 264       | 265       | 270       | 277      | 279      | 281      | 286      | 287      |
| 1,194     | 1,219     | 1,239     | 1,271     | 1,312     | 1,338     | 1,339     | 1,342     | 1,384     | 1,463     | 1,490     | 1,535     | 1,579     | 1,588     | 1,588     | 1,632     | 1,720    | 1,757    | 1,788    | 1,805    | 1,809    |
| 5,089     | 5,121     | 5,208     | 5,290     | 5,360     | 5,424     | 5,495     | 5,515     | 5,580     | 5,632     | 5,733     | 5,812     | 5,872     | 5,905     | 5,936     | 5,980     | 6,090    | 6,163    | 6,263    | 6,313    | 6,331    |
| 1,605     | 1,617     | 1,631     | 1,638     | 1,643     | 1,647     | 1,647     | 1,651     | 1,665     | 1,667     | 1,669     | 1,673     | 1,674     | 1,676     | 1,682     | 1,690     | 1,697    | 1,701    | 1,701    | 1,701    | 1,701    |
| 4,204     | 4,210     | 4,219     | 4,226     | 4,238     | 4,251     | 4,260     | 4,263     | 4,277     | 4,287     | 4,298     | 4,307     | 4,311     | 4,316     | 4,320     | 4,322     | 4,324    | 4,326    | 4,335    | 4,335    | 4,335    |
| 515       | 520       | 523       | 527       | 530       | 531       | 533       | 535       | 537       | 541       | 543       | 546       | 548       | 550       | 551       | 551       | 553      | 554      | 555      | 557      | 559      |
| 424       | 426       | 431       | 433       | 433       | 435       | 435       | 435       | 504       | 505       | 507       | 507       | 507       | 507       | 507       | 507       | 509      | 510      | 510      | 512      | 512      |
| 2,938     | 2,993     | 3,018     | 3,061     | 3,104     | 3,144     | 3,161     | 3,173     | 3,238     | 3,281     | 3,327     | 3,366     | 3,390     | 3,419     | 3,447     | 3,505     | 3,550    | 3,617    | 3,684    | 3,702    | 3,731    |
| 2,494     | 2,529     | 2,575     | 2,605     | 2,636     | 2,642     | 2,643     | 2,648     | 2,687     | 2,698     | 2,745     | 2,770     | 2,776     | 2,778     | 2,784     | 2,805     | 2,827    | 2,849    | 2,856    | 2,857    | 2,860    |
| 17        | 17        | 17        | 17        | 17        | 17        | 17        | 17        | 17        | 17        | 17        | 17        | 17        | 18        | 18        | 18        | 18       | 18       | 19       | 19       | 19       |
| 655       | 669       | 673       | 680       | 681       | 682       | 685       | 686       | 688       | 692       | 695       | 704       | 704       | 705       | 708       | 714       | 717      | 718      | 721      | 721      | 721      |
| 88        | 88        | 88        | 89        | 89        | 89        | 89        | 89        | 89        | 90        | 90        | 90        | 91        | 91        | 91        | 91        | 92       | 92       | 92       | 113      | 93       |
| 6,507     | 6,579     | 6,666     | 6,718     | 6,784     | 6,829     | 6,851     | 6,875     | 6,911     | 6,974     | 7,014     | 7,048     | 7,074     | 7,089     | 7,103     | 7,124     | 7,152    | 7,152    | 7,215    | 7,224    | 7,230    |
| 2,433     | 2,447     | 2,475     | 2,491     | 2,516     | 2,536     | 2,540     | 2,553     | 2,569     | 2,578     | 2,586     | 2,595     | 2,616     | 2,619     | 2,624     | 2,640     | 2,650    | 2,662    | 2,681    | 2,687    | 2,693    |
| 245       | 245       | 247       | 247       | 254       | 254       | 254       | 259       | 259       | 261       | 261       | 264       | 264       | 264       | 270       | 270       | 272      | 272      | 277      | 277      | 277      |
| 505       | 512       | 518       | 520       | 522       | 524       | 526       | 526       | 537       | 538       | 546       | 553       | 554       | 558       | 560       | 565       | 572      | 581      | 585      | 585      | 585      |
| 3,018     | 3,042     | 3,062     | 3,062     | 3,084     | 3,104     | 3,105     | 3,117     | 3,134     | 3,152     | 3,164     | 3,190     | 3,190     | 3,199     | 3,199     | 3,221     | 3,238    | 3,255    | 3,278    | 3,278    | 3,288    |
| 7,647     | 7,665     | 7,734     | 7,770     | 7,800     | 7,828     | 7,858     | 7,874     | 7,890     | 7,938     | 7,963     | 8,013     | 8,041     | 8,060     | 8,095     | 8,054     | 8,081    | 8,132    | 8,149    | 8,172    | 8,183    |
| 2,982     | 2,996     | 3,016     | 3,030     | 3,052     | 3,066     | 3,074     | 3,092     | 3,108     | 3,129     | 3,142     | 3,157     | 3,168     | 3,175     | 3,190     | 3,205     | 3,212    | 3,223    | 3,236    | 3,243    | 3,246    |
| 101       | 101       | 102       | 102       | 102       | 102       | 102       | 102       | 102       | 103       | 103       | 103       | 104       | 105       | 105       | 105       | 105      | 105      | 107      | 107      | 109      |
| 6,017     | 6,034     | 6,036     | 6,061     | 6,067     | 6,087     | 6,090     | 6,097     | 6,109     | 6,114     | 6,133     | 6,134     | 6,153     | 6,157     | 6,161     | 6,193     | 6,198    | 6,212    | 6,212    | 6,218    | 6,218    |
| 1,344     | 1,357     | 1,357     | 1,376     | 1,406     | 1,412     | 1,416     | 1,425     | 1,432     | 1,446     | 1,446     | 1,460     | 1,470     | 1,470     | 1,482     | 1,495     | 1,503    | 1,503    | 1,508    | 1,511    | 1,511    |
| 880       | 882       | 909       | 946       | 948       | 955       | 956       | 961       | 966       | 975       | 982       | 990       | 996       | 997       | 998       | 1,015     | 1,017    | 1,022    | 1,026    | 1,027    | 1,028    |
| 915       | 939       | 938       | 938       | 938       | 938       | 938       | 978       | 989       | 1,011     | 1,016     | 1,035     | 1,039     | 1,059     | 1,073     | 1,082     | 1,092    | 1,092    | 1,107    | 1,111    | 1,114    |
| 19        | 20        | 20        | 20        | 20        | 20        | 20        | 21        | 21        | 21        | 22        | 22        | 22        | 22        | 22        | 22        | 22       | 23       | 23       | 23       | 23       |
| 1,118     | 1,154     | 1,168     | 1,175     | 1,197     | 1,212     | 1,220     | 1,223     | 1,251     | 1,271     | 1,290     | 1,303     | 1,318     | 1,322     | 1,325     | 1,343     | 1,373    | 1,343    | 1,392    | 1,392    | 1,396    |
| 77        | 74        | 74        | 75        | 76        | 76        | 77        | 77        | 78        | 78        | 78        | 87        | 78        | 79        | 79        | 79        | 80       | 80       | 89       | 80       | 80       |
| 220       | 231       | 234       | 240       | 244       | 244       | 244       | 249       | 256       | 257       | 260       | 266       | 267       | 267       | 269       | 274       | 276      | 282      | 284      | 284      | 284      |
| 320       | 326       | 330       | 331       | 331       | 339       | 339       | 339       | 343       | 347       | 357       | 357       | 365       | 367       | 367       | 371       | 373      | 375      | 375      | 376      | 381      |
| 12,676    | 12,727    | 12,769    | 12,800    | 12,835    | 12,857    | 12,870    | 12,895    | 12,949    | 12,995    | 14,872    | 14,914    | 14,948    | 14,975    | 14,992    | 15,035    | 15,080   | 15,107   | 15,164   | 15,189   | 15,211   |
| 440       | 447       | 452       | 456       | 464       | 466       | 469       | 469       | 476       | 480       | 485       | 489       | 491       | 492       | 493       | 497       | 500      | 503      | 511      | 513      | 513      |
| 483       | 467       | 491       | 493       | 499       | 507       | 508       | 510       | 513       | 516       | 517       | 520       | 522       | 522       | 536       | 529       | 533      | 548      | 551      | 553      | 557      |
| 30645     | 30709     | 30750     | 30804     | 30824     | 30880     | 30927     | 30956     | 30992     | 31020     | 31066     | 31095     | 31134     | 31744     | 31769     | 31784     | 31810    | 31831    | 31855    | 31891    | 31906    |
| 2,573     | 2,597     | 2,611     | 2,633     | 2,667     | 2,697     | 2,700     | 2,704     | 2,735     | 2,755     | 2,772     | 2,788     | 2,804     | 2,807     | 2,818     | 2,863     | 2,876    | 2,886    | 2,903    | 2,907    | 2,911    |
| 371       | 371       | 376       | 377       | 379       | 380       | 381       | 382       | 382       | 382       | 375       | 390       | 393       | 401       | 401       | 401       | 406      | 407      | 407      | 398      | 416      |
| 180       | 182       | 183       | 187       | 188       | 189       | 190       | 192       | 192       | 195       | 197       | 202       | 202       | 202       | 204       | 207       | 208      | 209      | 209      | 213      | 215      |
| 6,276     | 6,319     | 6,361     | 6,399     | 6,419     | 6,423     | 6,426     | 6,518     | 6,557     | 6,579     | 6,603     | 6,606     | 6,614     | 6,649     | 6,687     | 6,712     | 6,746    | 6,740    | 6,749    | 6,754    | 6,754    |
| 851       | 865       | 876       | 885       | 894       | 894       | 894       | 903       | 906       | 912       | 920       | 927       | 927       | 946       | 950       | 956       | 959      | 960      | 960      | 960      | 960      |
| 602       | 607       | 617       | 621       | 639       | 644       | 653       | 659       | 673       | 683       | 693       | 694       | 711       | 716       | 720       | 739       | 766      | 784      | 793      | 813      | 820      |
| 75        | 77        | 78        | 78        | 81        | 81        | 81        | 81        | 83        | 84        | 87        | 88        | 91        | 91        | 91        | 91        | 93       | 97       | 97       | 97       | 97       |
| 483       | 493       | 497       | 509       | 515       | 524       | 526       | 531       | 542       | 556       | 567       | 577       | 584       | 584       | 592       | 604       | 609      | 620      | 633      | 637      | 646      |
| 1,983     | 2,029     | 2,062     | 2,105     | 2,140     | 2,165     | 2,182     | 2,192     | 2,220     | 2,249     | 2,266     | 2,324     | 2,366     | 2,393     | 2,403     | 2,424     | 2,481    | 2,525    | 2,575    | 2,608    | 2,637    |
| 144       | 146       | 149       | 155       | 156       | 155       | 158       | 160       | 163       | 165       | 168       | 168       | 170       | 168       | 171       | 173       | 175      | 183      | 182      | 181      | 185      |
| 1,570     | 1,583     | 1,586     | 1,602     | 1,607     | 1,611     | 1,620     | 1,645     | 1,661     | 1,675     | 1,700     | 1,724     | 1,732     | 1,740     | 1,763     | 1,763     | 1,786    | 1,816    | 1,845    | 1,853    | 1,853    |
| 55        | 55        | 55        | 56        | 56        | 56        | 56        | 56        | 56        | 56        | 56        | 56        | 56        | 56        | 56        | 56        | 56       | 56       | 56       | 56       | 56       |
| 1,221     | 1,231     | 1,226     | 1,245     | 1,255     | 1,265     | 1,270     | 1,276     | 1,284     | 1,293     | 1,300     | 1,304     | 1,310     | 1,310     | 1,320     | 1,332     | 1,339    | 1,342    | 1,352    | 1,354    | 1,359    |
| 700       | 709       | 718       | 725       | 736       | 751       | 751       | 751       | 757       | 764       | 773       | 773       | 784       | 784       | 784       | 791       | 793      | 800      | 803      | 803      | 803      |
| 88        | 88        | 88        | 88        | 88        | 88        | 89        | 90        | 92        | 92        | 92        | 92        | 93        | 93        | 93        | 93        | 93       | 93       | 93       | 94       | 95       |
| 18        | 18        | 18        | 18        | 20        | 20        | 20        | 20        | 20        | 20        | 20        | 20        | 20        | 20        | 20        | 20        | 20       | 20       | 20       | 20       | 20       |

| 7/6/2020 | 7/7/2020 | 7/8/2020 | 7/9/2020 | 7/10/2020 | 7/11/2020 | 7/12/2020 | 7/13/2020 | 7/14/2020 | 7/15/2020 | 7/16/2020 | 7/17/2020 | 7/18/2020 | 7/19/2020 | 7/20/2020 | 7/21/2020 | 7/22/2020 | 7/23/2020 | 7/24/2020 | 7/25/2020 | 7/26/2020 |
|----------|----------|----------|----------|-----------|-----------|-----------|-----------|-----------|-----------|-----------|-----------|-----------|-----------|-----------|-----------|-----------|-----------|-----------|-----------|-----------|
| 16       | 17       | 17       | 17       | 17        | 17        | 17        | 17        | 17        | 17        | 17        | 17        | 18        | 18        | 18        | 18        | 19        | 19        | 19        | 20        | 20        |
| 1,009    | 1,032    | 1,057    | 1,067    | 1,103     | 1,114     | 1,121     | 1,124     | 1,166     | 1,211     | 1,230     | 1,263     | 1,286     | 1,287     | 1,292     | 1,307     | 1,363     | 1,399     | 1,439     | 1,456     | 1,473     |
| 292      | 301      | 305      | 309      | 313       | 319       | 321       | 323       | 331       | 335       | 341       | 353       | 357       | 357       | 363       | 374       | 380       | 386       | 394       | 399       | 401       |
| 1,810    | 1,927    | 1,963    | 2,038    | 2,082     | 2,151     | 2,237     | 2,245     | 2,337     | 2,434     | 2,492     | 2,583     | 2,730     | 2,761     | 2,784     | 2,918     | 2,974     | 3,063     | 3,142     | 3,286     | 3,305     |
| 6,337    | 6,488    | 6,562    | 6,711    | 6,851     | 6,945     | 7,017     | 7,040     | 7,087     | 7,227     | 7,345     | 7,475     | 7,595     | 7,685     | 7,694     | 7,755     | 7,870     | 8,027     | 8,186     | 8,337     | 8,416     |
| 1,691    | 1,696    | 1,704    | 1,706    | 1,724     | 1,725     | 1,725     | 1,727     | 1,738     | 1,744     | 1,745     | 1,751     | 1,752     | 1,752     | 1,758     | 1,763     | 1,771     | 1,786     | 1,790     | 1,794     | 1,794     |
| 4,338    | 4,338    | 4,343    | 4,348    | 4,348     | 4,348     | 4,348     | 4,371     | 4,372     | 4,380     | 4,389     | 4,396     | 4,396     | 4,396     | 4,406     | 4,406     | 4,406     | 4,410     | 4,413     | 4,413     | 4,413     |
| 561      | 561      | 564      | 568      | 568       | 568       | 568       | 568       | 568       | 571       | 574       | 577       | 578       | 578       | 579       | 580       | 580       | 581       | 581       | 581       | 581       |
| 514      | 515      | 517      | 518      | 518       | 518       | 518       | 517       | 518       | 521       | 521       | 523       | 523       | 523       | 525       | 527       | 529       | 529       | 529       | 529       | 529       |
| 3,778    | 3,841    | 3,953    | 4,009    | 4,102     | 4,197     | 4,242     | 4,277     | 4,409     | 4,521     | 4,677     | 4,805     | 4,895     | 4,982     | 5,072     | 5,206     | 5,345     | 5,518     | 5,653     | 5,777     | 5,854     |
| 2,878    | 2,899    | 2,922    | 2,930    | 2,965     | 2,996     | 3,001     | 3,026     | 3,054     | 3,091     | 3,104     | 3,132     | 3,168     | 3,173     | 3,176     | 3,254     | 3,335     | 3,360     | 3,442     | 3,495     | 3,498     |
| 19       | 19       | 19       | 19       | 19        | 19        | 19        | 22        | 22        | 22        | 22        | 23        | 24        | 24        | 24        | 24        | 25        | 26        | 26        | 26        | 26        |
| 723      | 725      | 735      | 740      | 743       | 748       | 750       | 754       | 757       | 767       | 778       | 784       | 787       | 793       | 797       | 802       | 808       | 818       | 823       | 826       | 827       |
| 94       | 94       | 98       | 100      | 101       | 102       | 102       | 102       | 103       | 110       | 114       | 118       | 119       | 119       | 122       | 126       | 135       | 138       | 144       | 146       | 146       |
| 7,236    | 7,273    | 7,309    | 7,329    | 7,345     | 7,369     | 7,388     | 7,394     | 7,419     | 7,427     | 7,452     | 7,465     | 7,483     | 7,488     | 7,494     | 7,517     | 7,540     | 7,560     | 7,577     | 7,589     | 7,590     |
| 2,698    | 2,717    | 2,732    | 2,739    | 2,748     | 2,756     | 2,760     | 2,762     | 2,775     | 2,785     | 2,795     | 2,803     | 2,820     | 2,822     | 2,825     | 2,846     | 2,863     | 2,880     | 2,884     | 2,895     | 2,903     |
| 280      | 280      | 282      | 282      | 284       | 284       | 284       | 288       | 288       | 299       | 299       | 299       | 299       | 299       | 307       | 307       | 308       | 308       | 326       | 326       | 326       |
| 593      | 602      | 608      | 612      | 620       | 622       | 625       | 629       | 635       | 645       | 650       | 658       | 667       | 670       | 671       | 674       | 677       | 684       | 691       | 696       | 700       |
| 3,296    | 3,319    | 3,339    | 3,355    | 3,380     | 3,403     | 3,416     | 3,423     | 3,445     | 3,461     | 3,485     | 3,509     | 3,509     | 3,543     | 3,572     | 3,608     | 3,670     | 3,686     | 3,715     | 3,715     | 3,763     |
| 8,198    | 8,213    | 8,243    | 8,268    | 8,296     | 8,310     | 8,325     | 8,330     | 8,340     | 8,368     | 8,380     | 8,402     | 8,419     | 8,431     | 8,433     | 8,450     | 8,468     | 8,484     | 8,498     | 8,510     | 8,529     |
| 3,266    | 3,275    | 3,288    | 3,303    | 3,310     | 3,319     | 3,325     | 3,334     | 3,341     | 3,347     | 3,359     | 3,368     | 3,377     | 3,382     | 3,402     | 3,405     | 3,409     | 3,422     | 3,433     | 3,440     | 3,447     |
| 110      | 110      | 111      | 111      | 111       | 114       | 114       | 114       | 114       | 114       | 115       | 117       | 117       | 117       | 118       | 118       | 118       | 118       | 118       | 119       | 119       |
| 6,221    | 6,251    | 6,262    | 6,271    | 6,285     | 6,313     | 6,314     | 6,321     | 6,326     | 6,330     | 6,348     | 6,355     | 6,364     | 6,366     | 6,373     | 6,382     | 6,388     | 6,395     | 6,400     | 6,400     | 6,400     |
| 1,514    | 1,514    | 1,528    | 1,533    | 1,537     | 1,537     | 1,542     | 1,548     | 1,548     | 1,564     | 1,573     | 1,578     | 1,581     | 1,581     | 1,588     | 1,592     | 1,601     | 1,606     | 1,611     | 1,611     | 1,616     |
| 1,028    | 1,042    | 1,046    | 1,051    | 1,064     | 1,069     | 1,069     | 1,083     | 1,093     | 1,103     | 1,113     | 1,121     | 1,130     | 1,129     | 1,132     | 1,143     | 1,159     | 1,179     | 1,178     | 1,182     | 1,197     |
| 1,114    | 1,158    | 1,204    | 1,215    | 1,215     | 1,249     | 1,250     | 1,273     | 1,272     | 1,308     | 1,333     | 1,332     | 1,357     | 1,358     | 1,389     | 1,423     | 1,436     | 1,463     | 1,480     | 1,495     | 1,495     |
| 23       | 23       | 25       | 27       | 28        | 29        | 31        | 32        | 34        | 34        | 37        | 37        | 37        | 37        | 39        | 40        | 42        | 45        | 46        | 46        | 47        |
| 1,398    | 1,420    | 1,441    | 1,461    | 1,479     | 1,499     | 1,503     | 1,510     | 1,552     | 1,568     | 1,588     | 1,606     | 1,629     | 1,634     | 1,642     | 1,668     | 1,698     | 1,726     | 1,746     | 1,778     | 1,785     |
| 80       | 84       | 89       | 85       | 85        | 87        | 87        | 87        | 88        | 89        | 89        | 90        | 92        | 93        | 94        | 96        | 97        | 99        | 99        | 99        | 99        |
| 283      | 282      | 282      | 284      | 286       | 285       | 285       | 288       | 286       | 291       | 299       | 301       | 301       | 301       | 313       | 310       | 311       | 316       | 316       | 316       | 316       |
| 382      | 384      | 386      | 387      | 390       | 391       | 391       | 391       | 392       | 394       | 395       | 395       | 396       | 398       | 398       | 400       | 402       | 405       | 407       | 409       | 409       |
| 15,229   | 15,281   | 15,423   | 15,448   | 15,479    | 15,525    | 15,541    | 15,560    | 15,582    | 15,634    | 15,665    | 15,684    | 15,699    | 15,706    | 15,715    | 15,737    | 15,707    | 15,730    | 15,765    | 15,776    | 15,787    |
| 515      | 519      | 527      | 533      | 539       | 543       | 545       | 548       | 551       | 557       | 562       | 565       | 569       | 571       | 578       | 588       | 591       | 596       | 601       | 607       | 614       |
| 560      | 571      | 576      | 594      | 603       | 621       | 617       | 617       | 636       | 643       | 651       | 663       | 672       | 673       | 674       | 702       | 730       | 735       | 735       | 758       | 760       |
| 31928    | 31940    | 31968    | 31999    | 32015     | 32024     | 32069     | 32088     | 32109     | 32133     | 32139     | 32158     | 32179     | 32198     | 32203     | 32222     | 32263     | 32272     | 32289     | 32304     | 32320     |
| 2,927    | 2,970    | 2,991    | 3,006    | 3,032     | 3,036     | 3,058     | 3,064     | 3,069     | 3,075     | 3,103     | 3,112     | 3,132     | 3,174     | 3,189     | 3,219     | 3,235     | 3,256     | 3,297     | 3,297     | 3,307     |
| 415      | 416      | 424      | 428      | 432       | 432       | 441       | 424       | 424       | 430       | 432       | 438       | 451       | 451       | 451       | 461       | 473       | 477       | 483       | 495       | 496       |
| 215      | 220      | 224      | 230      | 232       | 232       | 234       | 237       | 244       | 247       | 249       | 254       | 257       | 260       | 262       | 269       | 271       | 273       | 282       | 286       | 289       |
| 6,787    | 6,812    | 6,848    | 6,880    | 6,897     | 6,904     | 6,911     | 6,931     | 6,957     | 6,973     | 6,992     | 7,007     | 7,015     | 7,018     | 7,038     | 7,063     | 7,079     | 7,101     | 7,114     | 7,118     | 7,122     |
| 960      | 969      | 971      | 974      | 976       | 976       | 976       | 984       | 984       | 987       | 988       | 990       | 990       | 990       | 995       | 996       | 997       | 1,001     | 1,002     | 1,002     | 1,002     |
| 827      | 846      | 884      | 905      | 929       | 951       | 961       | 972       | 993       | 998       | 1,070     | 1,096     | 1,135     | 1,155     | 1,164     | 1,221     | 1,285     | 1,334     | 1,385     | 1,465     | 1,491     |
| 97       | 98       | 98       | 101      | 107       | 109       | 109       | 109       | 109       | 111       | 115       | 116       | 116       | 118       | 118       | 118       | 119       | 121       | 122       | 122       | 123       |
| 653      | 665      | 685      | 710      | 723       | 738       | 741       | 749       | 767       | 783       | 796       | 815       | 838       | 843       | 847       | 871       | 888       | 925       | 938       | 964       | 967       |
| 2,655    | 2,715    | 2,813    | 2,918    | 3,013     | 3,112     | 3,192     | 3,235     | 3,322     | 3,432     | 3,561     | 3,735     | 3,865     | 3,958     | 4,020     | 4,151     | 4,348     | 4,521     | 4,717     | 4,885     | 5,038     |
| 190      | 199      | 201      | 209      | 213       | 215       | 216       | 220       | 226       | 234       | 235       | 243       | 243       | 243       | 249       | 258       | 263       | 267       | 274       | 273       | 275       |
| 1,881    | 1,905    | 1,937    | 1,958    | 1,962     | 1,966     | 1,968     | 1,977     | 1,992     | 2,007     | 2,013     | 2,025     | 2,027     | 2,031     | 2,048     | 2,051     | 2,054     | 2,067     | 2,075     | 2,078     | 2,082     |
| 56       | 56       | 56       | 56       | 56        | 56        | 56        | 56        | 56        | 56        | 56        | 56        | 56        | 56        | 56        | 56        | 56        | 56        | 56        | 56        | 56        |
| 1,370    | 1,384    | 1,394    | 1,409    | 1,424     | 1,424     | 1,438     | 1,399     | 1,404     | 1,421     | 1,427     | 1,434     | 1,444     | 1,447     | 1,453     | 1,465     | 1,468     | 1,482     | 1,495     | 1,494     | 1,501     |
| 803      | 812      | 814      | 816      | 821       | 828       | 820       | 827       | 833       | 834       | 838       | 840       | 850       | 851       | 853       | 866       | 872       | 885       | 885       | 898       | 899       |
| 95       | 95       | 95       | 95       | 95        | 96        | 96        | 97        | 97        | 98        | 99        | 100       | 100       | 100       | 100       | 101       | 102       | 103       | 103       | 103       | 103       |
| 20       | 20       | 21       | 21       | 21        | 21        | 21        | 21        | 22        | 22        | 24        | 24        | 24        | 24        | 24        | 25        | 25        | 25        | 25        | 25        | 25        |

| 7/27/2020 | 7/28/2020 | 7/29/2020 | 7/30/2020 | 7/31/2020 | 8/1/2020 | 8/2/2020 | 8/3/2020 | 8/4/2020 | 8/5/2020 | 8/6/2020 | 8/7/2020 | 8/8/2020 | 8/9/2020 | 8/10/2020 | 8/11/2020 | 8/12/2020 | 8/13/2020 | 8/14/2020 | 8/15/2020 | 8/16/2020 |
|-----------|-----------|-----------|-----------|-----------|----------|----------|----------|----------|----------|----------|----------|----------|----------|-----------|-----------|-----------|-----------|-----------|-----------|-----------|
| 21        | 22        | 22        | 23        | 23        | 24       | 24       | 25       | 25       | 25       | 25       | 25       | 26       | 26       | 26        | 27        | 27        | 27        | 27        | 28        | 28        |
| 1,492     | 1,493     | 1,538     | 1,567     | 1,581     | 1,603    | 1,627    | 1,633    | 1,668    | 1,698    | 1,714    | 1,731    | 1,751    | 1,768    | 1,797     | 1,847     | 1,882     | 1,890     | 1,893     | 1,896     | 1,898     |
| 408       | 428       | 434       | 442       | 453       | 458      | 464      | 475      | 490      | 508      | 515      | 521      | 535      | 544      | 555       | 566       | 573       | 582       | 587       | 600       | 599       |
| 3,304     | 3,408     | 3,454     | 3,626     | 3,694     | 3,747    | 3,765    | 3,779    | 3,845    | 3,932    | 4,002    | 4,081    | 4,137    | 4,150    | 4,154     | 4,199     | 4,347     | 4,383     | 4,423     | 4,492     | 4,506     |
| 8,445     | 8,518     | 8,715     | 8,909     | 9,005     | 9,224    | 9,356    | 9,388    | 9,501    | 9,703    | 9,869    | 10,011   | 10,189   | 10,293   | 10,359    | 10,468    | 10,648    | 10,808    | 10,996    | 11,147    | 11,224    |
| 1,799     | 1,807     | 1,822     | 1,822     | 1,838     | 1,844    | 1,844    | 1,844    | 1,849    | 1,851    | 1,852    | 1,857    | 1,857    | 1,858    | 1,863     | 1,875     | 1,875     | 1,882     | 1,888     | 1,896     | 1,896     |
| 4,418     | 4,423     | 4,425     | 4,431     | 4,432     | 4,432    | 4,432    | 4,437    | 4,437    | 4,437    | 4,437    | 4,441    | 4,441    | 4,441    | 4,444     | 4,444     | 4,450     | 4,450     | 4,453     | 4,453     | 4,453     |
| 582       | 583       | 584       | 584       | 585       | 585      | 586      | 586      | 587      | 587      | 587      | 589      | 590      | 591      | 591       | 593       | 593       | 594       | 594       | 597       | 597       |
| 580       | 581       | 581       | 581       | 585       | 585      | 585      | 585      | 587      | 587      | 587      | 590      | 591      | 591      | 591       | 591       | 593       | 593       | 593       | 593       | 593       |
| 5,931     | 6,117     | 6,333     | 6,586     | 6,843     | 7,022    | 7,084    | 7,292    | 7,402    | 7,627    | 7,747    | 7,927    | 8,109    | 8,186    | 8,359     | 8,553     | 8,765     | 8,913     | 9,141     | 9,345     | 9,452     |
| 3,509     | 3,563     | 3,642     | 3,671     | 3,752     | 3,825    | 3,840    | 3,842    | 3,921    | 3,984    | 4,026    | 4,117    | 4,186    | 4,199    | 4,229     | 4,351     | 4,456     | 4,538     | 4,573     | 4,669     | 4,702     |
| 26        | 26        | 26        | 26        | 26        | 26       | 26       | 26       | 27       | 27       | 29       | 30       | 31       | 31       | 34        | 34        | 38        | 38        | 40        | 40        | 40        |
| 834       | 839       | 845       | 857       | 867       | 871      | 876      | 883      | 887      | 899      | 908      | 913      | 925      | 930      | 933       | 940       | 951       | 959       | 966       | 973       | 975       |
| 152       | 160       | 173       | 177       | 189       | 197      | 197      | 200      | 210      | 217      | 223      | 229      | 235      | 237      | 239       | 246       | 246       | 251       | 265       | 269       | 269       |
| 7,608     | 7,638     | 7,654     | 7,670     | 7,692     | 7,700    | 7,714    | 7,723    | 7,742    | 7,770    | 7,791    | 7,822    | 7,840    | 7,845    | 7,846     | 7,866     | 7,881     | 7,905     | 7,932     | 7,937     | 7,955     |
| 2,906     | 2,924     | 2,932     | 2,946     | 2,965     | 2,971    | 2,975    | 2,980    | 2,996    | 3,007    | 3,013    | 3,023    | 3,036    | 3,041    | 3,044     | 3,069     | 3,086     | 3,105     | 3,113     | 3,128     | 3,133     |
| 335       | 335       | 349       | 349       | 358       | 358      | 358      | 365      | 365      | 368      | 368      | 380      | 380      | 380      | 387       | 387       | 395       | 395       | 402       | 402       | 402       |
| 709       | 719       | 724       | 731       | 735       | 740      | 742      | 744      | 751      | 752      | 760      | 764      | 772      | 773      | 775       | 783       | 790       | 796       | 804       | 810       | 813       |
| 3,786     | 3,812     | 3,883     | 3,925     | 3,949     | 3,949    | 4,007    | 4,024    | 4,051    | 4,096    | 4,146    | 4,207    | 4,207    | 4,263    | 4,287     | 4,313     | 4,361     | 4,402     | 4,430     | 4,430     | 4,507     |
| 8,536     | 8,551     | 8,580     | 8,595     | 8,609     | 8,626    | 8,638    | 8,648    | 8,657    | 8,659    | 8,691    | 8,709    | 8,721    | 8,735    | 8,741     | 8,751     | 8,769     | 8,790     | 8,804     | 8,813     | 8,837     |
| 3,458     | 3,478     | 3,488     | 3,493     | 3,506     | 3,515    | 3,523    | 3,530    | 3,536    | 3,551    | 3,565    | 3,577    | 3,585    | 3,591    | 3,604     | 3,612     | 3,620     | 3,631     | 3,636     | 3,639     | 3,641     |
| 121       | 121       | 121       | 123       | 123       | 123      | 123      | 123      | 124      | 124      | 124      | 125      | 125      | 125      | 126       | 126       | 126       | 126       | 127       | 127       | 127       |
| 6,405     | 6,421     | 6,422     | 6,443     | 6,450     | 6,457    | 6,457    | 6,463    | 6,471    | 6,478    | 6,506    | 6,524    | 6,520    | 6,519    | 6,526     | 6,533     | 6,539     | 6,555     | 6,566     | 6,586     | 6,592     |
| 1,620     | 1,629     | 1,634     | 1,640     | 1,646     | 1,654    | 1,654    | 1,660    | 1,670    | 1,677    | 1,681    | 1,689    | 1,698    | 1,701    | 1,707     | 1,707     | 1,726     | 1,739     | 1,745     | 1,752     | 1,759     |
| 1,201     | 1,213     | 1,220     | 1,233     | 1,243     | 1,253    | 1,253    | 1,255    | 1,266    | 1,273    | 1,280    | 1,301    | 1,301    | 1,307    | 1,307     | 1,312     | 1,323     | 1,325     | 1,335     | 1,346     | 1,367     |
| 1,501     | 1,563     | 1,611     | 1,611     | 1,693     | 1,693    | 1,711    | 1,753    | 1,753    | 1,804    | 1,825    | 1,874    | 1,874    | 1,896    | 1,912     | 1,944     | 1,989     | 2,011     | 2,043     | 2,080     | 2,084     |
| 47        | 52        | 55        | 58        | 60        | 61       | 61       | 64       | 65       | 66       | 70       | 74       | 75       | 75       | 75        | 79        | 79        | 81        | 81        | 82        | 82        |
| 1,790     | 1,820     | 1,865     | 1,903     | 1,924     | 1,964    | 1,969    | 1,982    | 2,010    | 2,050    | 2,092    | 2,134    | 2,160    | 2,168    | 2,172     | 2,204     | 2,249     | 2,287     | 2,313     | 2,343     | 2,347     |
| 100       | 102       | 103       | 103       | 103       | 105      | 105      | 107      | 108      | 109      | 110      | 112      | 112      | 113      | 118       | 120       | 120       | 121       | 121       | 125       | 126       |
| 317       | 321       | 324       | 328       | 332       | 332      | 332      | 332      | 332      | 335      | 340      | 345      | 345      | 345      | 348       | 351       | 356       | 360       | 361       | 361       | 361       |
| 409       | 409       | 411       | 415       | 415       | 416      | 417      | 417      | 418      | 418      | 419      | 419      | 419      | 419      | 419       | 419       | 420       | 422       | 423       | 423       | 423       |
| 15,804    | 15,825    | 15,798    | 15,809    | 15,819    | 15,830   | 15,836   | 15,846   | 15,857   | 15,842   | 15,849   | 15,860   | 15,869   | 15,874   | 15,878    | 15,890    | 15,885    | 15,893    | 15,903    | 15,876    | 15,903    |
| 619       | 626       | 632       | 635       | 642       | 651      | 654      | 655      | 658      | 667      | 669      | 675      | 681      | 685      | 690       | 693       | 695       | 697       | 703       | 711       | 714       |
| 765       | 785       | 806       | 827       | 856       | 858      | 858      | 874      | 889      | 917      | 927      | 947      | 977      | 985      | 991       | 1,009     | 1,024     | 1,058     | 1,073     | 1,097     | 1,100     |
| 32329     | 32338     | 32355     | 32368     | 32377     | 32395    | 32410    | 32419    | 32429    | 32431    | 32438    | 32449    | 32455    | 32465    | 32472     | 32487     | 32497     | 32509     | 32512     | 32526     | 32535     |
| 3,344     | 3,382     | 3,422     | 3,442     | 3,489     | 3,515    | 3,529    | 3,539    | 3,570    | 3,596    | 3,618    | 3,652    | 3,668    | 3,669    | 3,673     | 3,708     | 3,734     | 3,755     | 3,784     | 3,824     | 3,826     |
| 496       | 503       | 523       | 536       | 541       | 549      | 550      | 551      | 566      | 583      | 593      | 599      | 603      | 603      | 605       | 618       | 627       | 637       | 644       | 657       | 657       |
| 289       | 303       | 311       | 316       | 322       | 325      | 326      | 328      | 333      | 338      | 339      | 348      | 355      | 356      | 357       | 368       | 375       | 383       | 385       | 386       | 393       |
| 7,146     | 7,162     | 7,176     | 7,189     | 7,204     | 7,204    | 7,209    | 7,209    | 7,232    | 7,244    | 7,282    | 7,297    | 7,313    | 7,314    | 7,317     | 7,352     | 7,385     | 7,409     | 7,445     | 7,465     | 7,468     |
| 1,004     | 1,005     | 1,007     | 1,007     | 1,007     | 1,007    | 1,010    | 1,011    | 1,012    | 1,014    | 1,014    | 1,014    | 1,014    | 1,014    | 1,015     | 1,016     | 1,018     | 1,019     | 1,021     | 1,021     | 1,021     |
| 1,506     | 1,565     | 1,615     | 1,667     | 1,712     | 1,751    | 1,777    | 1,793    | 1,847    | 1,894    | 1,943    | 1,962    | 2,007    | 2,031    | 2,049     | 2,098     | 2,144     | 2,186     | 2,204     | 2,260     | 2,269     |
| 123       | 123       | 129       | 129       | 130       | 134      | 135      | 135      | 136      | 137      | 141      | 144      | 146      | 146      | 146       | 146       | 147       | 148       | 150       | 152       | 153       |
| 978       | 999       | 1,020     | 1,033     | 1,060     | 1,067    | 1,073    | 1,092    | 1,117    | 1,144    | 1,186    | 1,206    | 1,215    | 1,223    | 1,233     | 1,271     | 1,289     | 1,313     | 1,326     | 1,345     | 1,366     |
| 5,713     | 5,877     | 6,190     | 6,274     | 6,569     | 6,837    | 6,837    | 7,016    | 7,261    | 7,497    | 7,803    | 8,096    | 8,343    | 8,459    | 8,490     | 8,710     | 9,034     | 9,289     | 9,602     | 9,840     | 9,983     |
| 283       | 292       | 293       | 303       | 307       | 311      | 311      | 319      | 324      | 328      | 331      | 336      | 336      | 337      | 347       | 350       | 353       | 357       | 361       | 362       | 363       |
| 2,095     | 2,125     | 2,141     | 2,174     | 2,215     | 2,218    | 2,218    | 2,244    | 2,274    | 2,299    | 2,317    | 2,322    | 2,326    | 2,327    | 2,344     | 2,352     | 2,364     | 2,370     | 2,381     | 2,382     | 2,385     |
| 56        | 56        | 56        | 57        | 57        | 57       | 57       | 57       | 57       | 57       | 58       | 58       | 58       | 58       | 58        | 58        | 58        | 58        | 58        | 58        | 58        |
| 1,518     | 1,548     | 1,554     | 1,564     | 1,564     | 1,592    | 1,596    | 1,600    | 1,619    | 1,624    | 1,653    | 1,672    | 1,688    | 1,688    | 1,697     | 1,716     | 1,724     | 1,736     | 1,755     | 1,766     | 1,781     |
| 900       | 913       | 918       | 926       | 941       | 954      | 955      | 956      | 968      | 977      | 985      | 997      | 1,003    | 1,005    | 1,005     | 1,013     | 1,018     | 1,025     | 1,032     | 1,045     | 1,046     |
| 106       | 111       | 112       | 115       | 116       | 116      | 117      | 117      | 124      | 124      | 124      | 127      | 131      | 139      | 141       | 147       | 153       | 153       | 157       | 160       | 160       |
| 25        | 26        | 26        | 26        | 26        | 26       | 26       | 27       | 27       | 27       | 27       | 28       | 28       | 28       | 28        | 29        | 29        | 30        | 30        | 30        | 30        |



| 8/17/2020 | 8/18/2020 | 8/19/2020 | 8/20/2020 | 8/21/2020 | 8/22/2020 | 8/23/2020 |
|-----------|-----------|-----------|-----------|-----------|-----------|-----------|
| 28        | 29        | 29        | 29        | 30        | 31        | 32        |
| 1,925     | 1,936     | 1,944     | 1,974     | 1,996     | 2,011     | 2,017     |
| 603       | 619       | 631       | 641       | 663       | 674       | 687       |
| 4,506     | 4,529     | 4,634     | 4,684     | 4,688     | 4,756     | 4,771     |
| 11,242    | 11,342    | 11,523    | 11,686    | 11,821    | 11,988    | 12,134    |
| 1,896     | 1,899     | 1,900     | 1,903     | 1,910     | 1,918     | 1,918     |
| 4,456     | 4,456     | 4,457     | 4,458     | 4,460     | 4,460     | 4,460     |
| 597       | 599       | 600       | 601       | 602       | 604       | 604       |
| 593       | 595       | 595       | 600       | 600       | 600       | 604       |
| 9,539     | 9,758     | 9,932     | 10,049    | 10,168    | 10,274    | 10,325    |
| 4,727     | 4,794     | 4,849     | 4,904     | 4,998     | 5,092     | 5,132     |
| 40        | 41        | 43        | 45        | 46        | 47        | 47        |
| 987       | 989       | 1,005     | 1,016     | 1,021     | 1,030     | 1,036     |
| 273       | 282       | 291       | 298       | 304       | 306       | 307       |
| 7,967     | 7,993     | 8,017     | 8,044     | 8,066     | 8,083     | 8,089     |
| 3,135     | 3,165     | 3,180     | 3,191     | 3,208     | 3,218     | 3,220     |
| 405       | 405       | 411       | 411       | 419       | 419       | 419       |
| 818       | 830       | 842       | 856       | 864       | 872       | 881       |
| 4,526     | 4,554     | 4,609     | 4,637     | 4,687     | 4,687     | 4,746     |
| 8,842     | 8,848     | 8,876     | 8,888     | 8,901     | 8,921     | 8,921     |
| 3,650     | 3,661     | 3,669     | 3,674     | 3,685     | 3,691     | 3,694     |
| 127       | 127       | 128       | 129       | 130       | 131       | 131       |
| 6,592     | 6,608     | 6,618     | 6,634     | 6,634     | 6,655     | 6,659     |
| 1,758     | 1,767     | 1,792     | 1,800     | 1,799     | 1,813     | 1,817     |
| 1,396     | 1,402     | 1,414     | 1,417     | 1,419     | 1,425     | 1,426     |
| 2,128     | 2,128     | 2,190     | 2,190     | 2,237     | 2,240     | 2,248     |
| 84        | 84        | 84        | 89        | 89        | 90        | 91        |
| 2,348     | 2,396     | 2,431     | 2,465     | 2,494     | 2,521     | 2,531     |
| 128       | 130       | 130       | 132       | 135       | 136       | 137       |
| 362       | 368       | 371       | 373       | 376       | 376       | 378       |
| 423       | 424       | 427       | 428       | 428       | 429       | 429       |
| 15,916    | 15,925    | 15,926    | 15,932    | 15,941    | 15,943    | 15,946    |
| 718       | 723       | 729       | 734       | 739       | 743       | 745       |
| 1,105     | 1,130     | 1,162     | 1,200     | 1,215     | 1,227     | 1,227     |
| 32548     | 32553     | 32553     | 32559     | 32567     | 32582     | 32592     |
| 3,832     | 3,871     | 3,907     | 3,929     | 3,955     | 3,975     | 3,978     |
| 665       | 682       | 699       | 709       | 715       | 725       | 726       |
| 396       | 397       | 408       | 412       | 414       | 417       | 417       |
| 7,468     | 7,499     | 7,523     | 7,523     | 7,558     | 7,576     | 7,578     |
| 1,023     | 1,024     | 1,027     | 1,028     | 1,030     | 1,030     | 1,030     |
| 2,288     | 2,343     | 2,360     | 2,401     | 2,459     | 2,493     | 2,504     |
| 153       | 154       | 155       | 157       | 159       | 160       | 161       |
| 1,387     | 1,426     | 1,452     | 1,488     | 1,549     | 1,563     | 1,567     |
| 10,034    | 10,250    | 10,559    | 10,793    | 11,051    | 11,266    | 11,370    |
| 365       | 371       | 377       | 382       | 383       | 385       | 385       |
| 2,397     | 2,410     | 2,427     | 2,436     | 2,443     | 2,443     | 2,471     |
| 58        | 58        | 58        | 58        | 58        | 58        | 58        |
| 1,785     | 1,809     | 1,822     | 1,837     | 1,850     | 1,857     | 1,863     |
| 1,046     | 1,059     | 1,067     | 1,074     | 1,075     | 1,089     | 1,089     |
| 160       | 164       | 166       | 166       | 170       | 176       | 178       |
| 33        | 34        | 34        | 34        | 37        | 37        | 37        |
